# Supplementary material for: Decomposing the role of alpha oscillations during brain maturation
Source: eLife. 2022 Aug 25;11:e77571. doi: 10.7554/eLife.77571 (PMC9410707; doi:10.7554/eLife.77571)
Supplement: Figure 1—source data 1. [file elife-77571-fig1-data1.csv]

aperiodicInt	aperiodicSlope	indAlphaTotal	indAlphaRel	indAlphaAdj	IAF	age
1.880004982	2.12733968	0.697360814	4.145028424	0.738024609	9.2	6.72804
2.610183078	2.466502848	1.09175383	3.520912053	0.781377588	9.75	7.475929
1.858622845	2.253542636	0.352457105	3.222268476	0.332976303	7.8	7.98266
1.862191353	2.148531822	0.710496741	4.415643262	0.556193991	7.5	5.805384
1.463947294	1.876130994	0.640451535	4.400298703	1.008929636	10.65	12.836185
2.108788398	1.938844251	1.080626923	4.530581394	0.513044461	7.5	5.055213
2.047490669	2.254921881	0.639061537	3.54545301	0.499443093	8.25	6.785649
1.156768235	1.205286597	0.345676565	2.387049938	0.328141103	10	13.439082
1.818481099	1.888539923	0.838107361	4.573589921	0.804667744	10	12.921058
2.490048635	2.339646825	0.949680411	2.788242566	0.628772115	9.65	7.957449
1.833027934	1.986017743	0.484900857	2.245371791	0.387468609	8.7	9.189938
1.687307428	1.872207662	0.781613086	4.121879143	0.839982125	9.75	10.227469
0.599341111	1.580482337	-0.770050977	1.254403527	0.183059353	10.9	11.33858
1.34421138	1.530431525	0.790486709	4.029234703	1.015183179	11.75	12.942961
0.895619549	1.419936504	0.239641699	3.442295388	0.793835387	11.65	16.445242
1.368953621	1.822928628	-0.043393012	1.779081379	0.337762423	10.3	8.694273
1.849069662	2.069615936	0.44055165	2.839553419	0.322406883	8.1	6.304243
1.714968633	1.928673533	0.784379617	4.546603779	0.805042744	9.15	11.929956
1.916259881	2.037525389	0.336746306	1.764892049	0.293438932	9.5	6.927903
2.153501184	2.051697993	0.953051605	3.245661149	0.731704097	9.95	8.984029
2.359982583	2.170221994	1.022685261	4.082030402	0.817139851	11	9.985968
1.487599494	1.365737885	1.031258668	4.564885674	0.799085099	9.5	15.169404
1.26059327	1.573145025	0.100967512	2.097727867	0.263279738	9.25	11.341318
0.697788433	1.103379273	-0.070817403	2.030156434	0.198983016	8.75	14.251654
1.917371652	1.939814101	0.522123622	2.467896992	0.251905261	8.3	7.253593
0.962274139	0.835571793	0.211922038	1.234283139	0.079142272	11	13.121492
1.742167739	1.845157558	0.799121046	4.279159842	0.800989926	10	9.285649
2.154030281	2.417531897	0.718083162	3.639682364	0.84295486	9.95	10.725872
1.138878613	1.528981534	0.428633725	4.109773367	0.807615801	11	14.678872
0.885481634	1.576288013	-0.404525162	1.896837087	0.107860508	8.833333333	11.286675
2.126239316	2.184648869	0.870263186	3.874612568	0.733817416	9.35	7.013347
1.891881124	2.041331075	0.485245506	2.563112367	0.518122126	10.05	9.342687
1.459252433	1.749590008	0.422145739	3.188687096	0.62953403	10.15	11.582249
1.659421616	1.760120944	0.838296175	4.12578276	0.88555326	10.5	14.353524
1.872637939	1.990797016	0.414735306	2.237359338	0.322572468	9.05	10.211156
0.673327352	1.47367975	-0.113838134	3.442385515	0.384276716	7.5	15.015628
0.595358409	1.371190438	-0.245374143	2.847262516	0.434018723	9.7	17.603239
1.563388386	1.905816621	0.465756363	4.040176101	0.750318624	10.5	12.989504
1.315044608	1.864734024	0.324840714	3.372211025	0.83973615	10.75	16.162673
2.854508016	2.595298982	1.263448244	3.8594891	0.722701688	9	5.548482
2.185929439	2.179922345	1.094053073	3.937663308	0.941590637	9.8	10.9449
1.777790804	1.981949723	0.761714967	3.802593128	0.795041663	9.4	11.752566
1.643353216	1.892458959	0.545951519	3.765732635	0.667157404	9.75	12.069472
0.286041358	1.114890016	-0.367994153	2.238405811	0.399467288	9.125	7.287018
0.719550455	1.600197572	-0.348369929	2.769841831	0.555674896	11.5	14.342573
1.21057732	1.656209153	-0.203332039	1.372605369	0.234067906	11.05	10.708875
1.41407041	1.838823177	0.295840954	3.091412391	0.504193732	8.9	11.224161
2.250833874	2.251709944	0.800221934	3.406686541	0.654805855	9.8	6.755304
2.110967573	2.013909453	1.005773672	3.787502144	0.678401823	8.9	9.175564
2.331058002	2.247796975	1.276040555	4.896473613	1.069592573	10	9.198151
0.469100772	1.630516715	-0.49404405	3.105035143	0.636948163	10.75	12.842231
2.240944757	2.246736601	0.88777163	3.72511715	0.706113749	9.45	11.612822
1.255466766	1.845138188	-0.215845993	1.800937622	0.252631098	9.8	7.437257
1.435420455	1.916379479	0.354249954	3.906935631	0.725102037	9.95	11.346794
1.763121421	1.991545099	0.748465197	3.873394561	0.935314739	10.7	12.579283
2.028672244	2.150762564	0.782625105	3.730895043	0.510136458	7.85	9.14271
1.489209066	1.447511691	0.484306245	2.544367794	0.406173355	10.6	9.863449
1.422804103	1.665539382	0.619855147	3.683208298	0.812019948	10.5	13.506958
1.805815749	1.963594504	0.580398638	3.080020336	0.605469914	9.75	11.174309
1.898322683	2.164601163	0.91356348	4.811338303	1.033549657	9.75	12.075062
0.258348003	1.156594003	-0.671423798	1.879830914	0.048813574	8.25	6.835044
1.873738476	2.159078787	0.237311366	2.100371036	0.294562014	9.05	8.110654
2.11569505	2.17855503	0.801899684	3.800890899	0.798612582	10.5	9.337326
1.746016633	1.857841836	0.933337707	4.438843705	0.928788739	9.85	15.68355
2.276710479	2.18655165	1.275702468	4.528621311	1.002842152	9.45	11.68355
2.108361358	2.054470262	0.918849647	3.70040997	0.726109329	9.75	10.044261
2.064914789	2.230308849	0.684244627	3.172788714	0.73541295	10.1	10.468628
1.424851694	1.863968099	-0.129449798	1.39455197	0.175203917	10.3125	9.903832
1.877641231	1.689269002	0.910213946	3.109221126	0.520082162	8.8	12.58704
1.304637699	1.609588067	0.766227837	4.631132364	1.014354278	10.4	16.546543
1.69822501	2.092783201	0.377116548	3.301324604	0.550576429	9.05	9.183892
1.149216538	1.566904052	0.101209176	2.679074227	0.423567296	9.9	13.312685
1.858400984	2.037755925	0.774931441	4.056988173	0.916263995	10.75	13.173511
2.585513796	2.359599291	1.32983482	4.467808552	0.85420093	9.05	6.552817
0.756780978	1.535541251	-0.121685093	3.439653905	0.610451812	10.5	14.963951
1.582157303	1.544215196	0.884104535	4.176346504	0.741798261	9.75	13.507529
1.672938746	1.929071129	0.729127961	4.576608458	0.829447417	9.5	14.895619
2.178630259	2.31247864	0.943152733	3.968730675	0.683291976	8	7.289299
0.877876703	1.15499191	0.364386576	3.920687067	0.561026291	9.7	13.874515
1.18036476	1.757560546	0.438371587	4.777270145	0.91924705	10	15.150239
1.652587758	1.45289165	0.756731562	2.88200519	0.52992602	10.75	14.451973
1.256932133	1.625625037	0.290672999	3.620221558	0.629033446	10.75	8.905315
0.697786083	1.538531107	0.170372644	4.648718934	0.982410292	10.75	16.962126
0.687247002	1.477634882	-0.355026787	2.608338041	0.424613711	11	17.788957
2.101164827	2.240436208	0.619787821	2.347273691	0.483333725	8.75	11.847935
1.896370397	1.972926744	0.52654701	2.722424717	0.524232768	10.3	11.3906
1.264580881	1.916581926	0.026764665	2.736277856	0.578323663	10.05	13.696326
2.21852215	2.145980425	0.930377611	3.492049821	0.485252664	7.95	6.900524
1.768182341	2.04880052	0.716154853	4.329282117	0.707035939	8.45	12.176477
1.962565969	2.118481842	0.905465278	4.658385382	0.768616275	8.5	10.005247
1.682869648	1.985475544	0.902770416	5.072901697	1.101499573	10.05	13.975701
1.196520003	1.730245855	0.288479798	3.891616839	0.658883415	9.25	15.138831
2.08689978	2.137302256	0.473996971	2.145258622	0.545665257	11.4	7.409765
1.070090971	1.747607857	0.073295693	3.608633224	0.609656615	9.5	16.565708
1.474579129	1.91930797	0.307687187	3.383986363	0.544209878	9	8.803331
1.365963719	1.835742954	0.18107925	3.008004455	0.408356695	8.6	10.109171
1.580003078	1.675894536	0.7461898	3.956022846	0.884214645	11.75	10.898357
1.796018529	1.885768778	0.680528911	3.495836115	0.617963805	9.5	7.85649
0.815891995	1.522745338	0.208441916	4.479751443	0.907623355	11.05	17.277663
0.382758301	1.038447362	0.171761149	4.738848083	0.759944176	9.8	18.895391
0.77420307	0.801462203	0.343540725	1.690058436	0.024834734	7.75	13.638945
1.47608664	1.689132641	0.871408205	5.150400141	1.06849858	10.95	12.866301
1.792958033	2.243273293	0.277429707	2.83802461	0.558176178	9.6	10.227127
1.705883732	1.877625504	0.26754597	1.906561711	0.466722061	11.5	8.688341
0.80593064	1.184575303	-0.23358156	1.95206533	0.188691255	9	8.828542
1.999874436	2.079993448	0.58797158	2.916947756	0.527516412	9.75	9.73477
1.423972058	1.312988235	0.353074584	1.876995117	0.08053036	8.5625	10.443189
0.652990318	0.982404383	0.027162599	2.286221513	0.33171073	10.6	11.407597
1.823943401	1.937848667	0.527486035	2.761923744	0.458472918	9.25	8.488478
2.500462104	2.419290133	1.166186562	4.208970782	0.822570476	9	9.427675
2.131634289	1.989204439	1.044563976	4.058560544	0.657327181	8.75	7.250969
1.670480996	1.978093025	0.438106657	3.090368838	0.585100536	9.5	11.020876
1.469903768	1.747121297	0.656930311	4.483515363	0.802512479	9.6	12.899726
1.929540307	2.056240065	0.732456636	3.626889119	0.681346602	9.4	8.226214
1.309735795	1.915148194	0.02103161	3.294169862	0.516619299	9.95	8.36516
2.230455408	2.318903931	0.780549792	3.350980363	0.770667459	10.25	9.690965
0.044283358	1.321197464	-0.314402123	4.763761033	0.973123776	11.35	16.595938
2.164660874	2.069894184	1.050168183	4.290930677	0.700664241	8.75	6.057951
1.597437272	1.861447023	0.167923268	1.745206419	0.281582156	9.5	11.568446
1.779498661	2.066430884	0.434838471	2.988744919	0.672482147	10.65	10.437942
1.252683366	1.479923375	0.597445212	4.296414366	0.761930515	10.25	9.436344
1.209560787	1.763021038	0.557830197	4.455832318	1.013178409	10	16.579283
1.260419695	1.800730739	0.35408562	3.096273256	0.860796918	10.75	12.03947
1.63379436	1.978444218	0.2966904	2.749834125	0.657158665	11.35	9.504677
1.379440206	1.588819757	0.054508755	1.268704062	0.30702609	11.8	13.70146
1.097162072	1.18318514	0.279831753	1.245267227	0.069194854	10.75	15.042892
1.464943875	1.683549781	0.910267473	4.796679177	1.010519257	9.7	15.231804
2.161240074	2.169784465	0.998847298	4.927503716	0.802580305	9.25	8.831165
0.841051848	1.631745221	-0.160788482	3.259354416	0.560712329	10.25	17.435774
2.133911176	2.028078778	0.800764295	3.372417104	0.593177409	10.1	6.268651
1.970151085	2.047413075	0.968115391	4.398503504	0.912213143	9.8	11.183093
0.628963967	1.266276257	-0.358242232	1.113953306	0.159345559	9.25	12.540497
2.567486291	2.371064496	1.140635184	3.44472953	0.759045586	9.55	11.201574
0.520496443	1.162476352	-0.082179791	3.371718256	0.507844152	10.2	16.258955
1.051812039	1.61791142	0.27110148	4.378829332	0.776394087	10.35	17.310403
1.790185029	1.955565481	0.821865901	4.137631327	0.635816306	7.85	10.344855
2.29500154	2.247189502	0.729537434	1.606006006	0.444120797	9.05	9.460415
0.943277867	1.698012874	0.115361146	3.699222357	0.727553629	9.45	14.79101
1.378057655	1.877595891	0.121675149	2.810071295	0.411745155	8.95	8.261122
2.712905877	2.664476348	0.926464077	2.986784668	0.476522766	8.3	12.080652
2.32956262	2.346927189	1.105981755	4.043048602	0.901813996	9.25	6.999657
0.812948766	1.572342663	0.004157516	3.239875744	0.719938728	10.55	13.750627
2.113068541	2.190316882	0.880591648	3.657606652	0.780925991	9.5	9.854665
1.293209736	1.605946974	0.110958572	1.99747187	0.068118341	7.5625	8.385124
1.60688983	1.786284793	0.957350192	5.015682879	1.086930216	10.55	14.920146
1.824433548	1.849220163	1.035498418	4.617517607	0.977269369	10.2	10.306525
1.218269015	1.94494277	-0.392525291	2.346619318	0.096212948	7.75	10.966689
1.301846668	1.695395995	0.317120261	3.425548632	0.670847772	10.65	9.822267
1.48337895	1.470180233	0.17661381	1.408807116	0.082844193	10	13.458247
1.701743996	2.035748285	0.39208138	2.92210767	0.487491451	8.85	7.147501
2.363094158	2.230055031	0.83321887	2.97835686	0.356957285	8.25	8.351471
0.62779315	1.490162125	-0.467674015	1.82025807	0.245387517	9.15	8.214693
1.758214172	2.124401393	0.161559905	2.241174014	0.129861781	7.75	9.33493
2.200281949	2.297618816	1.043656729	4.295218745	1.015076234	10	12.765229
2.947095601	2.700458015	1.302574424	3.449753638	0.82314874	9.4	10.178302
0.778714623	0.70692726	0.296675435	1.919363506	0.066731482	7.25	17.345425
1.455962171	1.635794035	0.38085133	3.249745863	0.406276503	9.25	7.45414
1.186902655	2.079624596	-0.27415374	2.394168591	0.331173225	8.5	6.747205
2.222729926	2.251651083	1.211522802	5.103726961	1.040045859	9.35	15.268195
2.491245174	2.435972053	1.153747973	4.044312242	0.797779157	8.75	7.445471
1.656366483	1.83711539	0.497895862	3.374169861	0.365868207	8	7.05989
2.299628284	2.360720349	1.040808745	3.865484565	1.110898332	11.25	13.326374
2.265283518	2.214123036	1.046353763	4.194122847	0.729356861	8.8	6.229751
1.995448841	2.399816482	0.503406615	3.564977968	0.776256112	10	9.430527
1.857714243	2.002847042	0.593623412	3.326859809	0.549702469	9.25	10.925165
1.166868529	1.694892115	0.442453725	3.997156249	0.881780485	10.05	15.001825
1.021856827	1.074231596	0.323902742	3.145746054	0.328709625	7.75	7.478667
1.858219195	2.024472453	0.353063853	2.264787583	0.476550983	10.7	11.757472
0.518361209	1.62987467	-0.487776611	3.456679723	0.554623606	10.25	18.914099
1.44027971	1.701867984	0.039216221	1.690455787	0.215178577	10.1	9.208989
1.786765542	1.712525318	0.762467538	3.375031616	0.414000017	8.15	9.937371
1.906196918	2.210810571	0.519728639	3.791747997	0.75721584	10.5	8.25576
1.45040874	1.854896981	0.108141246	2.326926956	0.391995937	9.8	8.556924
2.271653019	2.008175224	1.143816585	3.844760984	0.842868348	10.75	6.682067
1.750729163	2.04653267	0.780443644	4.380446853	0.953689848	9.9	11.81759
2.866464949	2.575280547	1.208930576	3.222732903	0.645840745	9.05	7.620693
1.758908136	1.957687553	0.398067684	2.589410473	0.356276547	8.75	10.021788
0.970234004	1.544478306	0.059527015	3.638784991	0.549128629	10	16.138603
2.021129228	2.042494223	0.906485661	4.110978448	0.508954729	7.5	9.504791
1.556555569	1.874646382	0.244453069	2.541239716	0.374329919	9.15	8.549281
1.488522621	2.021855349	0.272848025	3.431419786	0.636204584	9.45	10.112594
1.730992104	1.834812637	0.400918726	2.14431721	0.531198961	11.5	10.21937
0.531534661	1.254841217	0.077833932	4.643477283	0.813875358	11.4	16.548825
1.833645014	1.898165895	0.86023929	4.349870758	0.889342388	10.75	12.625941
1.866723503	2.127799096	0.553559041	3.192175453	0.640736379	9.55	12.066849
1.624890399	1.849660893	0.613600191	3.87480516	0.642879051	9.05	6.164042
0.647867666	1.297972651	0.302546409	4.79885181	0.92214534	10.65	16.009354
1.877641946	1.973305056	0.773830235	3.739717993	0.596791262	8.5	5.219484
1.399578989	1.592262568	0.508906588	3.423470088	0.375032423	7.5	8.69644
1.871486657	1.980324036	0.960939908	4.496324696	0.764990332	8.25	5.917522
1.53506499	1.769922925	0.504336477	3.57201429	0.449247616	8.1	13.603239
1.851976634	2.034070208	0.624448203	3.709801111	0.705195205	10.1	11.549395
2.571640877	2.383292951	1.344089775	4.656050077	0.924314617	9.2	16.456194
1.885617835	2.115949779	0.691744698	3.834213221	0.616355764	8.4	11.177503
0.551807139	1.20002665	-0.090353268	2.719381048	0.545573043	10.9	13.743098
2.291754947	2.209236654	0.854817407	2.820535052	0.622990167	9.75	7.790326
1.443312109	1.683894139	0.405430156	3.472528223	0.594884405	10.5	9.387063
1.941449805	2.173612093	1.006692591	4.781613741	1.039499272	9.3	9.688341
1.334049121	1.81995919	0.651833036	5.360142054	1.014743069	9.75	20.297399
2.152913175	2.172274538	0.94447437	4.20534531	0.788379032	9.5	8.357061
1.380274911	1.760727765	0.214689046	2.960613088	0.452926228	9.5	7.404175
1.877174215	2.134007015	0.692811309	3.913156477	0.741696546	9.2	17.230321
2.390556841	2.420358456	1.092439651	4.274553983	0.660386645	7.7	7.182637
1.709570896	1.853143506	0.336029738	3.06651636	0.189742164	7.25	7.752566
1.861388663	2.130318591	0.423932092	2.25896222	0.364473705	8.35	13.438512
2.374819073	2.026712255	1.250867052	3.881122309	0.846120248	10.55	11.875199
0.619486403	1.402360829	-0.00274238	4.428661463	0.756952907	10.8	15.661647
1.899850227	1.860660966	0.538177262	2.289756294	0.212618104	8.25	6.602099
1.157496588	1.042014585	0.359585229	1.757934573	0.100101391	8.5	9.222792
0.738835097	1.407060207	-0.052303786	3.140852985	0.55625631	10.25	14.361282
1.172154172	1.732882666	-0.114661448	1.965303201	0.543190832	12.55	17.772644
1.519914357	1.895613035	0.447266227	3.647752608	0.438399914	7.3125	8.237166
1.991287665	1.897317806	1.172904046	5.183738711	0.998480279	10.25	10.503536
2.275912119	2.389103587	1.169947581	4.831040215	1.057625584	9.25	10.865046
2.525132567	2.374024959	1.149589765	3.977267311	0.60046615	8.05	5.70454
2.222191711	2.116745793	0.666966057	2.215237062	0.412803153	9.7	6.394136
0.942075021	1.616159631	-0.193519894	2.543972104	0.330859209	9.3	9.518366
0.971186517	1.384749408	-0.014464384	2.321361674	0.321870502	10.5	13.47456
1.35182085	1.756893653	0.049655101	2.166843685	0.127064909	8.333333333	11.760209
1.450980519	1.887772911	0.677928529	4.72416752	1.057402806	10.5	15.779374
2.189067698	2.075573481	1.148162363	4.382941778	0.779231957	8.75	8.453
1.997288721	2.266738742	0.569037254	3.429750915	0.459395732	8.05	7.757472
2.642480108	2.491303609	1.080183555	3.867435134	0.753945831	9.7	10.427446
1.898079739	1.996530374	0.698039212	3.229303095	0.560343584	8.85	11.333675
0.688864824	1.203582413	-0.081412968	2.621818782	0.319658157	9.25	11.108487
1.253041602	1.993221611	-0.422520724	1.522917738	0.062739903	7.75	13.747889
1.036226865	1.709846932	0.340601379	4.461940716	0.894087611	9.7	12.841546
2.137161298	2.233027758	0.301621618	1.341849399	0.228594232	9.6	9.063883
1.651096166	1.936495855	0.405338122	2.810988631	0.507947123	9.25	9.036162
1.360023317	1.678795438	0.405454709	3.943203843	0.726935665	11.2	10.484827
1.687684319	2.029018644	0.33876465	3.00127055	0.411821388	8.6	7.147501
1.774286971	1.933065929	0.6801151	3.369132597	0.708249821	9.75	7.598676
1.762449121	1.995905522	0.476017008	3.164468598	0.537298917	9.4	7.532968
2.391788307	2.441603334	0.967533168	3.644028735	0.785324899	9.3	8.882728
2.215359853	2.243835484	0.776993468	3.110974031	0.582876522	9.2	10.345197
1.665242932	2.086334099	0.343111328	3.124475218	0.555409205	9.15	9.36459
1.386413073	1.781160018	0.581335698	4.383103257	0.827418462	9.45	15.393908
2.21553765	2.314384484	0.871106145	4.080125005	0.621045871	8.3	8.53274
1.935709263	2.084039324	0.639648149	3.511144223	0.531500147	8.75	6.333789
1.690862019	2.034259114	0.253834297	2.694370144	0.43292233	9.5	10.002623
1.277255066	1.720630226	0.467823699	4.305721053	0.825741861	10.1	15.221423
1.729613999	1.925981499	0.424931367	2.663446895	0.539629502	10.25	7.574492
2.148628041	2.338157858	0.806172173	4.097156448	0.714772159	8.8	9.759297
0.390695459	1.010874272	0.243821943	4.29587783	0.833307759	10.5	18.038558
1.94954619	2.052125945	1.052405455	4.511260166	1.021423865	9.8	10.289984
1.771644576	2.071201163	0.365276572	2.527145472	0.409935061	8.75	6.94433
0.535502904	0.873895494	0.045538942	2.224639794	0.310980497	9.45	15.974332
0.923042057	1.621332882	-0.311791993	2.092420944	0.255542219	9.5	7.974332
2.130403311	2.278767284	0.536672048	2.746605887	0.564914996	10.05	11.615674
2.349670616	2.311062004	1.098348724	4.179767292	0.815513671	9.05	9.463153
2.160408701	2.22987078	1.143914011	4.726705617	0.883547938	8.35	11.949691
1.259168559	1.362052781	0.320263413	2.392601591	0.412588432	11	17.101756
1.580938396	1.680373633	0.954075852	4.928018272	1.033333562	10.9	12.6013
1.747767023	1.860408198	0.719007234	3.638191108	0.736763455	10.1	7.810061
2.002832019	1.815453356	0.80833618	2.952411177	0.397533729	8.75	7.853524
0.975665262	1.263631052	0.106995251	2.340668947	0.112256454	7.25	10.4214
2.267117992	2.348917929	0.676674982	3.055164963	0.36621521	8.05	8.58704
1.950408767	1.992064882	1.029900053	4.138195371	0.920953504	9.6	17.468742
1.597917088	1.660941334	0.922527077	4.545151174	0.894526062	10	7.774469
1.66061564	1.993066124	0.415043593	3.059236729	0.677336106	10.4	9.972393
0.804207658	1.581321298	-0.44467964	2.023915012	0.141035687	8.75	13.00924
2.52435464	2.484983812	0.951205712	3.055303963	0.649395904	9.05	6.952543
1.98334708	2.13082404	0.672035465	3.412010685	0.556982421	8.75	5.614305
1.598489292	2.149120062	-0.081006853	1.813071829	0.196769463	8.7	9.673853
1.667973578	1.894260848	0.659904831	4.014608854	0.777712344	9.95	15.661647
1.250134856	1.566611793	0.83079623	5.060924972	1.170163208	11.5	14.596509
1.874021108	2.046937106	0.72473706	4.359118391	0.780372186	9.95	9.7731
1.934295701	2.029394131	0.764103164	3.87968655	0.695285481	9.5	9.293976
0.394991834	1.117013385	-0.37549122	2.11180321	0.374612979	11.75	19.204882
1.392803781	1.583768993	0.615090019	4.434062254	0.757967533	10.5	13.548026
1.827708087	2.035943447	0.492787216	3.067638502	0.614690382	10.25	10.506502
1.731741657	1.742552573	0.848354138	4.146458136	0.780787889	10.2	12.91832
1.111655133	0.882827279	0.338219591	1.275347553	0.124142002	11.55	15.142026
1.72101623	2.042594354	0.712285575	4.280367387	0.942408515	10.2	14.188683
2.741887574	2.569751856	1.068455093	3.297003307	0.781057859	10.2	10.200205
1.142036177	1.660879746	0.228514996	3.292116824	0.635109747	9.75	17.73979
2.010272499	2.033580556	0.838847707	3.54658052	0.760263432	10.1	10.361168
1.649793947	1.949016241	0.582444138	3.598298233	0.822488796	10.5	9.649326
1.008570375	1.758859989	-0.017284364	3.304919966	0.39667858	7.75	7.90851
1.909601045	2.201301889	0.594528634	3.717598594	0.547432348	8.25	13.895847
1.616447992	1.902686948	0.515816713	3.642859514	0.648373817	9.5	9.561829
2.464823133	2.439718383	1.071974895	3.52938521	0.728422876	9.125	8.332991
1.602025053	1.66393696	0.846859988	4.24204673	0.817582465	10	7.439995
1.895078642	2.075838137	0.753840411	3.733915076	0.8052031	9.85	10.758384
1.579921039	1.837324489	0.380515431	3.518185956	0.64492156	11.25	9.134496
1.937676936	2.245040545	0.619146791	3.475012078	0.719519489	9.35	9.123659
1.901549243	2.092326124	0.475630241	2.813014165	0.52499945	9.75	8.762263
1.759319729	2.153469398	0.363145748	2.827819793	0.390220977	8	5.041409
0.918068571	1.3725737	0.819755037	5.373173585	1.267302234	11.05	15.730663
1.005134316	1.429040921	0.109300544	2.789964898	0.469577604	10.2	8.546657
1.149679095	1.679253896	0.205255625	3.156386449	0.817863817	12.35	11.64522
0.727808728	0.832484074	0.405664836	2.792886938	0.494806903	10.75	15.987451
0.839077654	1.406422342	-0.198384818	1.81881719	0.398465987	11.65	13.625142
2.232410264	2.077989634	1.008857309	3.724953199	0.686595461	9.5	6.506844
2.082881037	1.933796106	1.031315382	4.04935958	0.644242485	8.75	10.55065
2.069082661	2.161914388	0.609908186	2.46451681	0.61412206	10.4	12.239333
1.66578282	1.805024978	1.062987988	4.900514622	1.125689825	10.25	13.011407
1.709005292	1.95431536	0.2366389	1.756443004	0.133754836	8.75	8.560232
1.587922479	1.966261745	0.589502928	4.31760227	0.599575285	7.75	9.925963
0.706744193	1.393317291	0.565758974	4.922772481	1.184086822	10.15	15.278462
1.674328539	1.857501768	0.688935141	3.671438787	0.797955434	10.3	11.262491
1.617428075	1.813295799	0.542033393	2.878420637	0.425576776	9	7.872461
0.982510579	1.881869244	-0.139208165	3.330405265	0.566478486	9.1	16.609399
2.021288416	2.056932669	0.917871047	4.181115216	0.772095079	9.4	7.355007
2.458940728	2.470687108	1.075560248	4.247323462	0.624564419	7.75	7.864704
1.565327531	2.133517071	-0.048951793	2.145338325	0.263005551	8.8	13.977869
2.32012927	2.321376167	0.945043078	3.670512023	0.707637573	9.1	8.340748
1.213945027	1.65947821	0.775807234	4.405601397	1.190376296	10.75	21.715035
1.736663865	1.928318999	0.5429205	3.24980903	0.613587372	9.85	10.413643
-0.121813177	0.70638377	-0.607398018	1.525582879	0.110531554	8.25	7.878393
1.414726513	1.689280225	0.491884256	3.660038431	0.432201684	7.6	12.40349
1.46015801	2.080891043	0.233246195	3.615052133	0.765741076	10.25	13.773214
1.83446703	1.944024587	0.62219547	3.550598026	0.574732294	9.5	9.928587
1.130486196	1.618275508	0.416773547	3.569081854	0.687657825	8.6	16.444672
2.001117489	1.938547429	0.990367247	4.431740467	0.659898456	8.5	6.561031
2.436979004	2.557072413	0.972024827	4.429841538	0.604045558	7.7	6.706707
2.222080796	2.257481109	0.757979871	3.186787567	0.528685451	8.85	7.396646
2.170865565	2.140096351	0.784844941	3.268772849	0.424698595	8.25	6.646018
1.583701985	1.873870602	0.434883155	3.754908196	0.612540664	9.9	11.582249
2.001754199	2.007794306	0.973230579	4.498459525	0.869236697	10	11.057152
2.221931372	2.280515706	0.879552944	3.799137986	0.735637432	9.35	10.454711
1.050115169	1.962431675	-0.415719552	2.19117961	0.437011988	10.5	7.944216
1.421391146	1.874774403	0.272766285	3.335913015	0.45792527	8.45	15.172256
1.768630818	1.96217986	0.613623838	3.487057767	0.54318307	8.6	5.575861
1.323479886	1.298416145	0.915481635	4.619999309	0.819260253	10	17.707392
1.724689493	1.865508679	0.638235077	3.485985565	0.53200678	8.6	10.129021
2.003028823	2.191179796	0.595071759	3.033406644	0.556749661	9.1	10.476157
1.635724871	1.891426326	0.434178672	2.817881117	0.709278949	11.4	11.180355
2.343370942	2.256567045	0.848733758	2.770079474	0.463674993	8.6	9.58955
1.993897517	2.093817606	0.923821685	4.352019199	0.701487294	8.25	7.979237
2.130185557	2.071674256	0.926990608	3.744801912	0.689333707	9.4	5.55624
1.626085834	1.95600117	0.289155811	2.850257305	0.406884526	9	7.99555
1.709880666	1.933675806	0.631391339	4.015338285	0.699001628	9.5	10.369838
2.483656345	2.392454791	0.95122316	3.340633903	0.56558754	8.75	6.306525
1.479129823	1.945336363	0.433000915	3.711065179	0.659799256	8.75	12.59263
1.664085453	1.8117447	0.935224488	4.730746116	1.057273805	10.85	13.663586
1.609475392	1.775649878	0.118366766	1.700790689	0.187229572	10	7.702715
0.754464579	1.45138406	-0.058938353	3.387955476	0.390876935	8	16.625941
1.188597456	1.523596516	0.44887401	3.499651441	0.622469039	9.05	16.581565
1.914556407	1.915312646	0.676294911	2.928718153	0.595834187	10.25	5.832762
2.329903511	2.257886645	0.967179149	3.882933124	0.748050604	9.8	5.433036
1.845788093	1.88439851	0.975200347	4.574752052	0.866705747	9.55	9.969655
0.833041343	1.4016113	-0.371458726	1.553582112	0.208969002	11.35	17.529431
2.356110199	2.347105792	1.037701299	4.458492664	0.577756705	7.5	6.374857
1.406442649	1.608119211	0.674004984	3.989591025	0.774762582	9.85	14.528747
2.501390443	2.593156148	0.969569917	3.804699184	0.619539245	8	8.869609
0.733314007	1.503298361	-0.439160738	1.662625825	0.275947696	10.25	7.768879
2.083982621	2.184595914	0.801232462	3.689852672	0.632992418	8.75	8.091946
2.181754618	2.144530845	0.781648772	3.218638184	0.587411353	9.65	7.401893
1.759682412	2.063109354	0.224073119	2.090294856	0.34500103	9.5	9.808236
1.373397271	2.036722925	-0.199804637	2.154661341	0.212866079	8.75	6.204996
1.676322158	2.028224013	0.698742746	4.205153772	0.907102786	9.7	14.662445
1.201631878	1.084686198	0.546457319	2.605151146	0.428860703	11.15	19.632101
1.62731427	1.858889819	0.247751224	2.087847381	0.400502366	10.25	11.437713
1.130435371	1.626293911	0.634694935	4.810672606	1.045443968	10.05	14.871092
1.456158853	1.840247404	0.266548091	3.469263155	0.594761535	10.5	11.527948
1.566418699	1.767230142	0.41515681	2.924611423	0.439346043	9.15	5.529545
1.564180321	1.866073683	0.400632463	3.302129624	0.627907871	10.3	11.97148
1.256081969	1.849532221	-0.179682857	1.938540219	0.146479326	8.4	11.850673
2.089236532	2.24285257	0.586273636	3.031548923	0.394697577	8.25	5.362537
1.682922135	1.892707848	0.331083945	2.35690119	0.329431584	8.95	7.029089
1.947361956	2.0481564	0.987681485	4.82650539	1.001625857	10.25	12.291352
1.052361169	1.575050535	0.63454911	4.635070593	1.008565516	9.25	17.2496
1.47620536	1.198077523	0.521591498	1.796914312	0.096018938	8.75	9.123659
1.403352635	1.796867111	0.723879535	4.258485158	0.999119701	9.9	20.157768
1.770346185	1.902141647	0.379939183	2.228793514	0.248867032	8.5	8.091489
1.801251874	1.961319609	0.608598642	3.813031302	0.555902813	9	9.271503
1.716735711	1.830675495	0.838472328	4.466548883	0.874784106	10.25	12.571184
2.725586379	2.366836013	1.322594469	3.893946291	0.672562885	8.75	7.27059
2.085713467	2.291315998	0.546495521	2.890330677	0.478687369	9	7.417978
1.402072283	1.949040882	-0.040198034	2.300888063	0.311651263	9.15	7.314054
1.940899074	2.090408316	0.820120126	4.323912058	0.800785081	9.5	7.377595
1.757026717	2.214264794	0.439983048	3.524158395	0.819143988	10.4	9.413871
2.079668425	2.24458783	0.685519847	3.51859166	0.606946809	9	9.934633
0.953206253	1.565401004	0.29968224	3.870353698	0.695545454	8.5	19.19895
1.33996792	1.84983684	-0.013848299	2.068255961	0.369099951	9.8	11.787702
2.10319113	2.198613525	0.360370656	1.848131523	0.478574438	11.4	12.871891
1.873704182	2.064084795	0.558474035	3.946227448	0.582136539	9.5	8.546543
1.903678673	1.966271141	0.919519083	4.262444816	0.768810846	9	11.557494
1.298486173	1.938500267	0.202109947	4.293707684	0.861949105	11.4	14.208418
1.676344508	1.834783447	0.067614289	1.069417131	0.170344022	10.5	7.157768
1.812640362	2.022374126	0.64168241	3.711723152	0.632029429	9	5.096851
2.166768779	2.003712365	1.094074405	4.159566471	0.71365567	9	8.762719
0.868963688	1.473382697	-0.341979957	1.509663639	0.171970417	9.85	10.164613
1.724120459	1.798542312	0.722617105	3.29690091	0.788005663	11.05	10.561031
1.923823259	1.926557632	0.870104434	3.823845948	0.790044487	10.25	11.751996
2.157954721	2.23250448	0.781340882	3.568202329	0.547368338	8.5	7.144193
1.998281536	1.961066371	0.483967722	1.719575243	0.339279419	10	6.103924
1.992781094	1.964715549	0.850421666	3.711869981	0.58056297	8.75	7.607004
1.064396627	1.398128162	-0.051700134	1.63313958	0.171115315	9.55	10.375313
1.149797844	1.682544257	0.077220515	2.928100461	0.597729166	11	17.51791
1.641448191	1.872868741	0.761501627	4.124561576	0.833370397	9.4	12.215263
0.361557174	1.019117173	-0.0288016	3.947745311	0.585543731	10.25	17.928701
2.469237927	2.534942113	0.936029905	3.681627876	0.643445392	8.45	15.079169
2.010866984	1.973985219	0.95967935	3.885719003	0.930321126	11.25	11.306297
0.717773967	1.377359537	0.115709221	3.894182201	0.685712709	9.8	20.072895
1.206084537	1.499966494	0.293562198	3.236956756	0.486070489	9.75	9.537075
1.561073433	1.816669418	0.485797085	3.778139015	0.641833379	10	13.222222
1.450750911	1.954747501	0.324026734	4.031258207	0.720896482	10	7.248345
1.374522139	1.829585248	0.168438824	2.955878267	0.593220068	10.8	11.842915
0.647556575	1.293878485	0.297280995	4.611092856	0.901045188	10.45	15.911362
2.253789823	2.306539665	1.113831317	4.825467099	1.010507201	9.75	8.672484
1.999097472	1.997795035	1.239937027	5.378694816	1.129148596	10	16.152292
1.625699237	1.8150584	0.526698349	3.095242784	0.329716476	7.75	7.081222
0.882444084	1.555979234	0.048175484	3.555899128	0.655730855	10.25	13.77253
1.885685903	2.118813622	0.472846724	3.441609676	0.61612822	10.25	12.650011
0.303368397	1.55185511	-0.502039132	3.373032452	0.527387373	8.45	8.379534
1.91145366	1.997548214	0.517975172	2.746660376	0.519365644	10.25	8.53274
1.325461955	1.70201453	0.559678343	4.54498814	0.851112427	10.1	13.345881
1.350346498	1.639297367	0.271003503	2.879440601	0.470115276	10	11.245493
2.124040946	2.094480756	0.945749443	4.047441163	0.852594904	10.5	9.959274
1.568810692	1.883626054	0.568292934	3.486091672	0.698270627	9.25	12.48574
1.853622928	2.043785205	0.528546996	2.943652281	0.57516667	9.7	10.764202
1.833203806	2.016272414	0.884972141	4.396130482	0.957542131	10	13.395391
1.272963395	1.192978314	0.279964749	1.497805296	0.119353477	9.75	15.87018
1.480685182	1.666880828	0.129953176	1.50991045	0.181513258	9.5	9.627538
1.895009695	2.20553855	0.236516814	2.017685878	0.357128969	9.4	8.491216
1.963646382	1.935027425	1.02088927	4.2944903	0.82020869	9.35	13.65811
1.833733052	1.986120351	0.58638157	3.285914606	0.5404738	9.15	7.86767
0.649496313	1.297213457	-0.116367784	3.151070837	0.443678547	9.75	14.367214
2.252413633	2.149260886	1.079445763	4.508747246	0.885155706	10.25	11.92448
1.139732877	1.65749135	0.212222677	3.505600676	0.717925607	11	17.422085
1.491399733	0.936004921	0.786135134	1.639000835	0.114186396	10	16.335843
1.89603666	1.9338544	1.071662973	5.025066336	0.958210789	9.55	10.405658
1.426030243	1.891664657	0.179278937	3.715353677	0.58747707	10.5	10.520419
1.4675485	1.968891892	0.275476658	3.87640053	0.663599637	9.95	9.066735
2.155147261	2.145671545	1.005098372	4.124708404	0.822314706	9.5	9.430869
2.26071492	2.273234537	0.916860835	3.666256079	0.860358633	10.5	8.584759
2.086531987	2.233370614	0.723502925	4.007567205	0.628065949	9	7.623203
1.905360756	2.149513117	0.840620689	4.652680278	0.911154812	9.5	7.105863
1.147905088	1.596488738	0.459893198	4.551845508	0.860002943	10.5	16.406228
2.107515312	2.292558945	0.746314667	3.617754526	0.746186113	9.5	11.960643
1.51826948	1.899053571	0.685780241	4.784476615	0.860555376	9	13.381473
1.928076523	1.940283924	0.612761352	2.813759995	0.414487136	9	6.326146
0.216550321	1.105174342	-0.633275572	2.096995578	0.048357117	7.75	10.087953
2.067985573	2.127034747	0.468552378	2.257053806	0.265832139	8.75	7.439767
1.648781821	1.788963131	0.758716418	4.320232941	0.869393474	10.8	10.627195
1.5554851	1.986314903	0.495118804	4.021157856	0.481562302	7.25	6.982888
1.765055644	1.989309247	0.61476279	4.035744627	0.628943891	9.05	5.452201
2.082548065	2.043693489	0.853550153	3.521827201	0.532266121	8.5	7.139402
1.489850931	1.559171795	0.291276896	1.920969798	0.32862263	10.7	8.784166
1.910563684	1.438942525	1.04640501	2.65924143	0.564317894	11	9.129135
2.236307199	2.187466422	1.042837699	4.505986425	0.762454495	9.05	7.510951
1.707228033	1.797132266	0.595808607	2.981485014	0.74935628	12	10.632215
1.320676808	1.820287566	0.120653174	3.164545278	0.529587819	10.1	10.189253
1.804122998	1.940626221	0.593322573	3.596446199	0.670902905	10.5	8.87999
2.166419191	2.292468015	0.939679335	4.694697731	0.755711039	8.55	8.581565
1.837266703	1.744331469	0.810745095	3.405429981	0.599921045	9.75	6.703399
2.15633544	2.155453374	1.046422003	4.275719151	0.869711272	9.5	11.678074
1.251262644	1.39285866	0.263873828	2.35508938	0.410778511	11.25	11.93566
0.994069624	1.658343786	-0.056862061	3.026611036	0.300725321	7.8	7.095482
2.804921323	2.656991421	1.316719465	4.685570405	0.716425686	8	8.14636
1.371319791	1.589042327	0.726430056	4.504039533	0.984102442	11.75	11.103011
0.854608138	1.355071592	0.210061164	3.979198479	0.543758985	8.75	17.471252
2.308159171	2.318575684	0.941061417	3.921364853	0.719282204	9.15	9.028405
1.957783505	2.258449432	0.551108327	3.422759403	0.669357125	9.5	9.310289
2.196863601	2.161941991	1.018200968	4.447018272	0.748752319	9	8.546087
0.789204543	1.304418178	0.542520719	4.221513571	0.941701272	9.35	19.732831
2.454877304	2.293908018	1.118358577	3.983760007	0.611571337	8.3	5.783595
1.300274798	1.772389193	-0.018516787	2.045832446	0.291277843	9.3	6.730778
2.49010911	2.613179112	0.884586387	3.633595243	0.724179236	9	9.356947
1.438529604	1.727636547	0.330879128	2.940400536	0.374577619	8.45	8.650467
2.093519969	1.956936981	1.206399116	4.63041798	0.88509595	9.25	12.480835
1.538125685	1.903098904	0.484889717	3.725678455	0.532308767	8.05	10.478895
1.126322969	1.470314271	0.046796286	2.574565728	0.074681981	7.25	15.111909
2.148456126	2.05081676	0.942766601	3.611438699	0.732735469	10	8.526808
2.081026279	2.139177555	0.821563475	4.056729691	0.745876347	9.85	12.439653
1.533459667	1.718962568	0.262988232	1.916620511	0.150018188	8.05	5.362422
2.403653637	2.391169846	0.881935091	3.123937617	0.81923568	10.7	8.984485
1.856933909	1.675288043	0.8774737	3.229063641	0.446544053	8.3	10.73671
1.659407107	1.927406726	0.773182694	4.74216365	0.935553839	10	9.652635
1.12190551	1.548750949	0.268331471	3.158134993	0.724437921	11.6	12.48072
2.519032349	2.300303403	1.208647593	3.745366937	0.67202683	8.5	9.082591
1.642927664	1.620521493	0.686824213	3.385928105	0.445376994	8.55	10.728496
1.847147652	2.099634564	0.72681614	4.543458111	0.689142787	8.5	15.30025
0.9143258	1.664488869	0.030435004	4.369690908	0.705867734	10.2	16.365845
1.881860923	2.008118515	1.00292366	4.983444262	0.993537522	9.75	11.85649
0.868563338	1.580245677	0.399047051	4.980667581	1.024126527	10	15.719256
1.089648276	1.58451337	0.600396634	4.409058613	1.104662046	11.3	18.821127
1.848827293	1.881375423	1.0706143	4.818832424	1.06805794	10.75	12.653319
2.36344539	2.01975595	1.074932286	3.19703267	0.505801106	8.95	5.430412
2.2530361	2.124473577	1.204104753	4.307672395	0.991976869	10.3	12.927104
1.302164546	1.619432729	-0.102864624	1.413367594	0.220575778	11.25	6.342003
1.636623727	1.569280905	-0.02643281	1.021528951	0.17453355	11.75	11.590463
1.735730449	1.95820682	0.37048308	2.558478256	0.460616093	9.75	7.500342
1.905999959	2.067966542	0.781953361	3.860303432	0.856229843	10.25	10.471138
1.29063502	1.36715195	0.528320277	3.775605439	0.508899963	9.7	14.320214
2.041579743	2.292659094	0.720225393	4.305496159	0.654469337	8.5	10.082477
2.010615021	2.206854025	0.471129877	2.35669034	0.589624764	10.4	6.629591
3.056173782	2.858654325	1.2821144	3.693142358	0.853698688	9.5	8.729409
1.96677249	2.12198942	0.854281477	4.821134432	0.893206136	10	9.610997
1.892283564	1.851275357	0.582621133	2.228221964	0.444980953	10.05	7.847707
0.541946381	1.290706441	0.011617732	3.968292992	0.705646645	10.25	15.965662
1.909745035	1.983695092	0.79688212	4.141639069	0.71060722	9.5	9.427561
1.937791923	2.185329905	0.694510621	4.093999786	0.569987067	8	8.921058
1.840634438	1.918608866	0.723928735	3.4057156	0.614891854	9.2	8.365274
1.716372838	1.818715208	0.415875705	2.373035817	0.418546268	10	8.713552
2.071509685	2.02047832	1.226148023	4.590717358	1.01703035	9.55	16.349418
2.252035014	2.294986358	0.999967827	4.120100879	0.863659377	9.55	9.074948
1.280034684	1.207057812	0.635799734	3.228575071	0.455504346	9.35	11.366529
1.571697212	1.940696596	0.548652328	4.017565081	0.811294907	10	12.565023
0.770420458	1.442085783	-0.50100715	1.420854334	0.221728038	12	10.640543
1.06015056	1.651926438	0.316329338	4.028605581	0.774677532	9.5	16.124914
1.937071342	1.989112647	0.681235669	3.258697347	0.639481003	10.15	10.148186
1.209265681	1.618291217	0.57074584	4.681269766	0.891083487	10	14.610312
1.252610725	1.626852424	0.112209211	2.663779775	0.425043738	10.35	10.799224
1.488342864	1.685771004	0.832690583	4.559648717	1.072500413	11.75	12.253593
1.700020349	2.0397867	0.58297477	4.196463021	0.615268355	8.3	10.928359
1.390302955	1.80658679	0.523297317	4.356162662	0.884728076	10.5	14.490303
1.980145752	2.204157054	0.527433983	3.185984843	0.625031547	9.95	8.009924
1.436742727	1.708249346	0.626574512	4.705931561	0.741730975	9.3	12.62537
1.037302612	1.58049705	0.066670393	3.174321728	0.415356591	8.75	7.26751
1.998997495	2.136758467	0.594456158	2.986413568	0.609721844	9.95	10.273556
2.955185808	2.734207102	1.285380337	3.8521276	0.767795385	9	8.855806
1.825802779	2.237738244	0.431910238	3.816318865	0.692610506	9.75	12.13039
1.347725681	1.902020865	-0.007679869	2.400772686	0.328896938	8.9	5.660848
1.620237852	1.771553573	0.330080864	2.467710993	0.361667993	9.75	8.949007
1.910146425	1.827876517	0.748736022	3.016702905	0.542930993	9.75	8.546543
1.504631757	1.833095163	0.089873933	1.682727846	0.219483537	9	9.528975
1.023867473	1.230606182	0.592827045	3.962419042	0.843146303	12	15.979237
2.227450366	2.29047055	0.938349598	4.135183109	0.611407612	8	5.161989
2.200393322	2.179301435	0.740395089	2.840134764	0.548886286	9.55	7.128108
1.912165549	2.104305133	0.876751916	4.786138405	0.948122248	9.95	10.281656
1.184590318	1.799691343	-0.13295076	2.32489749	0.336787467	9.5	11.519849
2.022376949	1.605868403	1.054532218	3.264795622	0.440393037	8.75	9.101756
2.159504826	2.122780863	1.058305372	4.317981427	0.855665517	9.55	7.823636
2.147556952	2.073156339	0.833037793	3.211627959	0.607132378	9.65	11.875199
1.910477525	2.106854899	0.569104178	3.283832214	0.611900376	9.65	9.647159
1.242803938	1.922743167	0.059024262	3.75323505	0.68058358	10.5	12.806525
2.441913037	2.160509792	1.088771141	3.450435395	0.56729531	8.95	9.936801
1.422653986	1.147264139	0.782536441	3.006215603	0.36595536	8.75	10.722564
2.263296556	2.398246195	0.690848453	3.385383144	0.632089444	9.5	8.316449
1.008004172	1.528597181	0.211603372	3.521897379	0.754530985	11.5	16.565708
2.091477944	2.025667897	0.682383288	2.761117236	0.390666303	8.95	8.165411
0.916232981	0.717036551	0.587850432	2.499211115	0.300409916	8.75	11.174195
1.5358254	1.299817139	0.432384999	1.597212055	0.09138926	9.5	13.893566
1.585536798	1.641995311	0.428463789	2.340131177	0.382525063	9.95	9.79717
2.335430126	2.479926776	0.882058408	3.746787098	0.790941942	9.25	9.093543
1.851648123	2.095658538	0.705153398	3.697526566	0.678746307	8.65	14.835386
1.004882348	1.549959333	0.025339237	2.690161282	0.488299737	10.05	15.141455
1.384567779	1.799057875	-0.104060696	1.577788422	0.167306463	9.55	5.934633
1.258196255	1.446498948	0.282239606	2.400619153	0.401393836	10.2	13.397558
1.595505209	1.761637875	0.773321568	4.464287087	0.820395782	9.75	10.02715
2.040959794	2.138202678	0.865311749	4.353512062	0.902614863	10.55	9.102213
2.181249821	2.388675596	0.904580985	4.757813683	0.95057062	9.75	7.661647
1.387212502	1.88801679	0.002040383	2.318358842	0.067376792	7.25	13.617043
2.720700719	2.340872594	1.303558437	3.777694321	0.635644352	8.75	9.95357
1.31915525	1.787824927	0.555377621	4.261965311	0.841058693	9.1	11.007871
1.98879422	1.906897568	0.69715003	2.904216603	0.408393507	9	5.964636
1.965155041	2.073483061	0.481158838	2.316743941	0.526530057	10.5	9.739561
1.535246131	1.81211589	0.668672422	3.758300019	0.573894635	7.5	16.480835
2.257812229	2.348878182	0.742993036	3.358133989	0.734457103	10.25	10.429614
1.715940911	1.873481176	0.499960317	2.921467641	0.475192391	9.2	11.612936
1.98684265	2.105637227	0.988595058	4.664391887	0.878970525	9	10.438398
1.951123356	2.098066062	0.54450644	3.145376385	0.493407441	9.25	8.015514
1.619890588	1.858951356	0.540385226	3.633100351	0.629296709	9.5	11.82318
0.819821093	1.33867385	0.328831155	4.379546114	0.794300222	10.3	17.537075
1.953631213	2.001153343	1.067751542	5.029152223	1.077934251	10.75	13.679557
1.477646859	1.889135799	0.38373867	4.038382617	0.54590821	8.6	11.190622
0.645340429	1.477104932	-0.29582158	2.83961036	0.284459644	8	9.039242
1.494876598	1.880740865	0.656001109	4.809764916	0.914757474	9.75	16.830595
1.650545916	1.994556745	0.519236811	3.940082468	0.646878518	9	8.981291
1.937774068	1.97004328	0.877211589	3.953375283	0.566742563	7.95	5.630161
1.058353597	1.630380036	0.555979919	5.292913328	1.078503417	10.5	14.419347
1.219720677	1.63869459	0.19221545	3.070147673	0.495919667	9.7	10.011293
1.191846323	1.017330592	0.503053732	2.323919137	0.297648973	10.5	13.652521
2.528583952	2.531366505	0.805122315	2.788804288	0.352875832	7.9	7.905315
0.788602678	1.572618396	0.131346012	4.267301193	0.829176869	10	14.955738
1.261172789	1.42715928	0.669345781	4.21177886	0.615681587	8.25	19.656741
2.530904671	2.371170917	1.21500016	3.923609695	0.681818888	8.2	15.087383
0.902366963	0.883015835	0.188152624	1.307064704	0.093833116	10.25	7.976386
2.153245035	2.000229423	0.958487097	3.436323524	0.643911034	9.5	7.278462
1.851816131	2.028255623	0.483810734	2.838355402	0.48469881	9.4	9.707392
1.862074183	1.936128216	0.70913309	3.094529896	0.652335924	9.75	7.492584
1.862048583	2.210480409	0.362807917	2.872131394	0.439200859	8.75	10.043805
2.195036424	2.017141247	1.005840212	4.054409294	0.665018601	9.5	12.797855
1.5575007	1.75564533	0.452220922	3.359585691	0.484645797	9.25	11.02156
1.580355882	2.031431099	0.846522132	4.964978529	1.133516708	9.5	13.986082
1.630141771	1.927782726	0.661482057	4.221064837	0.762724621	9.15	11.248916
1.84931884	1.868784555	1.011983245	4.606516901	0.880505438	9.5	12.245379
1.993128861	2.184126159	0.777501029	4.067814317	0.87588259	10.25	13.107346
0.858880606	1.29577869	0.509395581	4.377327332	0.936868991	11	16.387291
2.148927128	2.213827865	0.932797548	3.850081825	0.569398679	7.7	6.443303
2.249168081	2.256692374	0.783213081	3.280881325	0.66706292	10	9.03331
1.704234423	1.924581226	0.377542039	2.452658305	0.548833979	10.6	12.371321
1.09167289	1.721319279	0.249114684	4.358839929	0.775256384	9.9	13.198037
1.964546461	2.053969259	0.956591668	4.39534648	0.880113397	9.5	11.053844
1.857194242	1.980345638	0.89790091	4.504517717	0.984101135	10.75	10.153547
1.878666859	2.056203316	0.68347254	3.922405991	0.588874599	8.6	6.936687
1.140534098	1.280212405	0.199738066	1.902670906	0.315528954	10.75	9.61921
2.234158875	2.112729112	0.578951934	1.755767173	0.418100863	10.75	12.516084
2.357325461	2.266027778	1.047113009	3.767543881	0.831629261	10	11.338466
1.25909492	1.616443859	0.70067477	4.74990812	1.046266718	11	12.478097
2.146945185	2.19552284	0.77505727	2.791405547	0.730535923	10.25	11.081336
1.431470903	1.264871964	0.719144459	2.053249356	0.357872089	8.25	17.261122
2.551969245	2.461981813	0.961429532	3.271265346	0.50708516	8.35	6.468514
2.091229709	2.098645958	0.687512233	3.049152707	0.553093693	9.75	8.261236
2.105226485	2.156978258	0.846483665	3.630287368	0.494248677	7.75	10.437827
1.839364583	1.981372033	0.885808728	4.701744315	0.65671922	7.75	8.031257
1.946341943	1.994986016	0.660087923	3.274011515	0.504188384	9.1	5.797855
1.622449735	1.967502025	0.549851299	3.554048478	0.820905911	10.35	10.834816
1.933695476	2.086661756	0.735942141	3.774073201	0.453298945	7.45	5.140314
1.825431235	1.900579618	0.48963825	2.506401987	0.431188784	9.7	5.219484
0.795104362	1.501748664	0.481106633	5.065847771	1.127678347	10.3	18.980492
1.786839069	1.956305379	0.586416609	3.772195609	0.597870255	9.5	7.193474
1.618887515	2.036446393	0.556751609	3.848978647	0.866669505	10.05	11.908624
1.696924353	1.88610373	0.37594574	2.649002264	0.401816813	9.4	13.107118
2.060980056	2.271093379	0.75797528	3.307554461	0.893350902	10.45	10.145448
1.825267456	1.906144342	0.588830718	3.197748132	0.406286836	8.5	6.437713
0.724046225	1.139840006	0.254106974	3.632162833	0.607433628	10	17.288044
2.363003948	2.290432933	1.297074351	4.942876462	0.942624873	8.75	6.585671
1.092530788	1.144207748	0.197840161	1.701615805	0.11745072	8.95	12.866415
1.419091845	1.670860767	0.05979952	1.687513805	0.040963525	8.125	8.639516
2.249224224	2.197056058	1.11507359	4.398661699	0.824569217	9	9.274811
1.420297237	1.849899234	0.394644808	3.759655774	0.776636528	10.6	16.329682
1.368276579	1.179967611	0.340454386	0.628158631	0.050665105	9.4	21.482318
0.563178248	1.473012666	-0.335514726	3.009843905	0.370755818	8.5	5.419803
1.686604964	1.79304261	0.413877422	2.196634034	0.448682355	10.3	10.578028
1.089225784	1.382673614	0.328697216	3.35948796	0.528698498	9.75	14.88193
0.305593532	1.168796555	-0.083278775	4.429638373	0.739509341	10.4	21.673967
1.320194951	1.72138581	0.003479624	2.044403071	0.27577072	9.5	12.132785
1.583379968	2.072263956	0.340377076	2.872116266	0.614849281	9.1	8.956764
0.366125441	1.109377731	-0.563755987	1.389687709	0.054217785	8.95	13.157084
2.296468022	2.300308489	1.182077196	4.655036524	0.955597208	9.15	12.163244
1.765241771	1.79377939	0.552617393	2.961670976	0.411835688	9.25	10.788158
2.357794572	2.354708146	0.869306337	3.293487853	0.540809599	8.5	6.501254
2.197892252	2.237384097	0.637575247	2.635729122	0.296143114	8	5.534337
0.839057253	0.938027565	0.172252678	2.024922155	0.202504526	9.65	12.40965
2.170921684	2.189060549	0.691864287	2.856929462	0.407527476	8.5	5.761578
2.158278334	2.200001866	0.986038648	4.05700141	0.806979721	9.15	7.595824
2.237557242	2.181626162	0.97417026	4.147728178	0.712310029	9.25	5.016997
0.539816805	1.589479478	-0.327693391	3.726954324	0.53742542	8.9	15.694843
1.741922337	1.885089713	1.043381749	4.430420614	1.033925442	9.5	13.628108
2.345864777	2.411812969	0.832741503	3.534716478	0.671032636	9.25	9.038672
1.820048506	1.918271766	0.502689237	2.455734106	0.435552093	9.4	9.507529
2.367448217	2.14465105	1.124704618	3.781771382	0.728681927	9.5	9.274697
1.812630969	1.894574932	0.393893145	2.016884245	0.376376848	10.05	8.152178
1.684410384	1.775804894	0.612689991	3.985686314	0.584068587	9.75	13.515172
1.266397181	1.439067446	0.458464469	3.119874237	0.41431703	8.3	11.727583
1.306394045	1.590340302	0.573001469	4.095493583	0.789510898	10.25	11.33858
1.622727844	2.030454839	0.325543245	3.208130928	0.569268453	9.5	9.610997
2.002462641	2.118594977	0.816297365	4.125521128	0.84259275	10.25	9.833333
1.825394513	1.871590236	0.917214905	4.349580884	0.928488718	10.75	11.09765
1.146059359	1.805642451	0.146900891	3.068890912	0.729917478	10.25	19.738307
2.318453314	2.042827332	1.250491964	4.474330108	0.685909002	8.45	7.218571
1.568776552	1.339066697	0.798052535	3.098117217	0.293712975	7.5	11.163244
1.748898615	1.826471902	0.646060055	3.475126873	0.60019315	9.75	11.17488
1.618479527	1.430195698	0.760376895	3.187453121	0.485908351	9.9	11.259753
1.551593395	1.938975213	0.747736409	4.733240202	0.849277155	8.4	16.672484
2.032383122	2.24135947	0.627080636	2.996864865	0.39958581	7.65	12.723933
2.108351166	2.249736722	0.848933434	3.800024269	0.758319068	9.1	9.159822
1.419594016	1.645416466	0.356917781	2.857011711	0.512967953	10.25	19.873146
1.853339498	1.91926666	0.48245818	2.534317933	0.356431641	9.15	5.77812
1.187232913	1.730453796	0.113076516	3.421038548	0.603755935	10.5	10.096052
0.82679122	1.392568055	0.050006443	3.24859381	0.589799419	10.75	15.224161
1.534529475	1.88993597	0.35248038	3.55841158	0.645999817	10.45	12.181953
1.481750843	1.741767787	0.122847289	1.987300945	0.168508764	8.75	8.527378
1.11952151	1.445104121	0.478101522	4.185140414	0.81221385	11.3	14.054642
1.064080834	1.217338924	0.305915089	2.821538712	0.251916146	8	6.457449
1.222879112	1.666081159	-0.048387215	2.210418719	0.335756202	10.4	11.283937
1.342618839	1.407102596	0.53250223	2.545266763	0.56708784	10.7	11.010495
1.240708041	1.577858809	0.094331515	2.34655109	0.324844347	9.75	10.421514
1.622324827	1.957910047	0.513335039	3.587895749	0.507815211	7.95	8.696668
0.872984811	1.226773339	0.570901566	4.436675857	0.901799791	10.75	15.727469
1.915847096	1.953936733	0.988887887	4.507205232	0.944122745	10.25	13.088523
1.967925861	2.066225145	0.582558753	3.026612276	0.513967048	9.5	9.753251
0.788097465	1.607675128	-0.217609923	3.14497817	0.35453429	8.25	8.086584
1.648190869	1.974619245	0.441395526	3.513456381	0.649602181	9.9	11.067989
0.829482489	1.789705775	-0.306897483	2.78975599	0.387923644	8.35	14.200205
1.479160608	1.918388013	0.386060248	3.729693875	0.695635408	9.75	10.352954
1.935275106	2.092889965	0.880931718	4.479704961	0.811510287	9	18.36402
1.787118207	2.04331406	0.457005515	3.164653304	0.385787409	8.15	6.500798
1.219377893	1.671564636	0.253301513	3.270696803	0.693330353	11	14.898243
2.022332269	2.067183691	0.702579682	2.914823736	0.599116181	9.7	7.174423
1.480881981	1.663970145	0.51043341	3.566872765	0.53645527	9.25	11.08955
1.341984307	1.390477691	0.424490309	2.675697562	0.446750277	10.75	13.983572
1.339651632	1.83583939	0.368715057	3.666965511	0.778930095	10.2	9.564567
1.776916135	2.04781551	0.621264853	3.748091873	0.652491454	8.9	12.882614
1.912023652	2.068806913	0.91130276	4.269033751	0.938642476	9.85	9.572553
1.08324202	1.726667745	0.176316061	4.245406491	0.767315278	10.5	12.499885
2.219267562	2.229562472	1.191928445	5.091165137	0.894107624	8.5	12.384439
1.68628942	2.043706215	0.509478601	3.397027365	0.754893312	10	11.16062
2.30308387	2.272318947	1.095929015	4.412638744	0.875557535	9.45	7.90543
1.444046158	2.130925174	-0.302427919	1.663384366	0.360509204	10.8125	6.114875
1.834881629	2.172435331	0.554819723	3.789316021	0.65670807	9	7.382956
1.761262249	1.967196569	0.824500664	4.267791585	0.886942696	9.65	10.270933
1.900126752	2.085554362	0.538053282	2.62140645	0.466816378	8.75	9.126397
1.724302639	1.810857978	0.709413205	3.376484593	0.796862164	11.2	7.423568
1.334148814	1.715024846	0.569012103	4.397743455	0.81067536	9.5	18.090691
0.403921979	1.464927169	-0.43792885	3.456130136	0.560957534	10.25	15.93874
2.491137854	2.380639901	0.958325884	3.523027792	0.661885561	9.55	6.840292
2.166047158	2.169232497	1.015416026	4.301775407	0.783283453	9	7.382386
1.979678493	1.987242881	0.671027706	2.945558326	0.544286365	9.75	6.960757
1.689105008	1.950194837	0.358771547	2.895797449	0.254603686	7.75	9.901665
1.932150711	2.194170104	0.859203038	4.70166979	0.790368764	8.3	10.553045
1.32544183	1.894491899	-0.049247988	2.324001654	0.47093031	10.6	14.17294
1.700943387	1.92042766	0.227045493	1.934554879	0.359500692	10.2	6.813027
2.187555212	2.21067647	0.988595942	4.412848843	0.722302542	8.65	8.948437
0.772734361	1.291788124	0.081149394	3.050991783	0.436678305	8.7	7.853296
1.718144452	1.898482347	0.084420419	1.475215553	0.193322266	10.35	9.682067
1.052459737	1.795832556	0.06976599	4.168146273	0.668087689	9.5	15.302988
1.191824999	1.605975298	0.631656756	4.368131552	0.952728665	10	17.476842
1.858318576	2.021682984	0.550911292	2.705796207	0.743814867	11.5	7.798539
0.850567302	1.211180336	0.163070962	3.275796694	0.486909141	10.5	9.783595
1.787074469	1.918393276	0.712481362	4.220480118	0.738665662	10	5.98882
2.295115881	2.217352808	1.095641809	4.406938561	0.737645465	8.7	7.83185
2.265597374	2.296520594	0.850606381	3.618275829	0.564160552	8.5	8.198836
0.825565168	1.130576996	0.481308751	3.979350947	0.7438788	10.3	14.996235
2.185939237	2.203963424	0.971293475	4.214351747	0.650110901	8.25	6.936687
1.961126201	1.930213862	1.005130451	4.361223942	0.856911339	9.85	8.579397
1.64585079	1.772040702	0.599256803	3.249771739	0.423749391	8	9.769678
1.223724682	0.999357417	0.497675363	2.043079075	0.266039405	11	10.468514
2.009992604	1.990132252	0.853933281	3.795112791	0.594428852	8.8	5.567191
2.103768555	2.088205075	0.863669726	3.312172047	0.517536168	8.2	7.409765
1.536917921	1.941508057	0.161183582	2.659157983	0.444264814	9.85	11.89174
1.761664309	2.080317056	0.179359086	1.823793881	0.312825787	9.35	8.806068
2.863678959	2.582549959	1.455671866	4.525894471	0.606424746	7.3	6.818389
1.864258216	2.018706573	0.842378319	4.41556759	0.817396839	9.35	6.744581
1.629188457	1.874871687	0.59555203	4.019437155	0.761733157	10.25	9.1402
2.06841532	2.254298696	0.866736728	3.955243928	0.794794149	8.9	9.33493
1.413166197	1.73417424	0.661959608	4.61112342	0.930313224	10.5	12.500114
1.945097665	1.941067305	0.767740464	2.510861512	0.698100056	10.55	11.5
2.359484308	2.206663154	1.341430812	5.151216198	1.121609135	10.5	9.430755
2.242476231	2.248561765	1.037387569	3.992510523	0.805805139	9.05	9.761464
0.181148531	0.704730363	-0.054410332	2.740450632	0.443248506	10.4	13.192105
2.329230372	2.269492753	1.041505406	4.228379738	0.773620897	9.3	8.776637
0.043520095	0.855909788	-0.577345439	1.655901773	0.13351178	8.85	10.402806
1.83018667	1.93228525	0.808096417	3.924204573	0.700581075	9	9.879762
1.76465038	1.748773124	0.825912846	3.985664455	0.691846589	9.75	9.203057
1.399813373	2.017266345	-0.244939897	1.593270065	0.261959987	10	10.65138
2.112341543	2.231652025	0.745829932	3.425359436	0.545969389	8.45	6.356148
2.041276886	2.206883849	0.618722116	3.199289061	0.544926756	9	8.535021
1.217485873	1.331721802	0.629966193	3.726662181	0.696579376	10.45	12.795231
1.727149565	1.833038474	0.179337937	1.315057343	0.070040593	8.85	6.309148
1.870085969	2.338985526	0.397964367	3.332747286	0.413024361	7.7	14.410449
1.773040588	2.004630391	0.667819772	4.009318195	0.774120869	9.85	12.667122
0.811816143	1.571422201	-0.182668322	2.861049189	0.373818454	8.65	8.556924
1.552906715	1.572676451	1.107456458	5.265953768	1.150204848	11.5	14.044147
2.248386243	2.150116232	0.801231813	2.632962586	0.424621271	8.65	5.113278
1.724159612	1.559341889	0.705433483	3.065361111	0.393425578	9.25	11.31451
0.508958116	1.053241992	-0.211716783	1.955003239	0.211035358	8.85	8.647273
2.46525194	2.331275494	1.033965711	3.612688253	0.495115095	7.95	9.400182
0.689408101	0.750861491	0.366865004	2.959127077	0.410870749	10.65	18.194159
2.294846227	2.443077658	0.806865662	3.26317791	0.617474502	8.5	7.174309
1.563106545	2.031089772	0.219858222	2.794047531	0.419009695	8.6	10.769678
1.940787165	2.184934679	0.578885943	3.29118154	0.658241003	9.6	19.062057
0.135458942	0.964051983	-0.515443075	1.693533168	0.272270283	10.25	9.630161
1.571748969	1.905130159	0.349546163	2.602372072	0.583286127	10.05	14.024526
1.313034238	1.856419026	0.020034571	2.442588228	0.549916941	11	13.455053
1.268056946	1.383132638	0.504317465	3.128679744	0.554119718	10.15	14.640428
1.536891418	1.841131109	0.718269865	4.735914805	0.966607616	10.5	13.616472
1.757287114	1.947439438	0.633736542	3.688846564	0.645356484	9.3	6.372689
2.001963093	2.161629454	0.816491318	4.185885553	0.643466439	8.25	6.61362
1.688653107	1.740748243	0.891124726	4.46959161	0.778098861	9.25	8.847592
2.571689127	2.434439803	1.281469367	4.811332084	0.705148608	7.85	7.070385
1.689520046	1.963475611	0.621413129	4.502106909	0.523824453	7.25	6.175564
0.656439788	1.298725308	0.356232444	4.456121923	0.927343379	10	17.572667
1.759655012	1.478194302	0.617470936	2.121266323	0.255000127	10	8.852612
1.81674214	2.110548543	0.468155485	3.598308561	0.550928717	9.15	13.847022
1.616492531	1.967204352	0.5478073	3.998698307	0.884210922	11	11.689596
1.102652714	1.88621875	0.143997989	4.610963259	0.824192792	10	16.0154
1.390602154	1.593727856	0.866236693	5.25679377	1.075436644	11.25	14.191991
1.897021269	2.085951586	0.553833109	3.168095989	0.574279114	9.5	6.175564
2.319032734	2.235985205	1.133954647	4.732378164	0.631820584	7.75	6.082135
2.817952678	2.801866233	0.966679339	2.98549778	0.473563476	8	7.853296
2.5194217	2.531061367	1.032470307	3.972481176	0.676328157	8.4	9.252338
1.924442297	1.981781121	0.646439913	3.159146596	0.488795512	9	6.985398
2.430697394	2.294237157	0.928611953	3.071130579	0.528338603	8.9	7.302988
0.511349978	1.569734484	-0.578677757	2.094024328	0.404206574	10.2	20.841775
0.969038384	1.522847135	0.289142188	4.443876299	0.868260114	11.55	14.421286
2.290924679	2.211718957	0.926420643	3.81589276	0.780060888	10.5	8.398129
1.63760887	1.82242018	0.235078355	1.786259197	0.31500595	9.95	13.022359
1.534899481	1.803395851	0.143578198	1.831120532	0.308630021	9.95	8.444672
1.562464291	1.717866421	0.52627845	3.176012543	0.565580376	9.75	13.058521
1.8786744	2.142796487	0.401506353	2.803308177	0.322611258	8.15	7.300365
1.437393735	1.820386603	0.502323925	4.378431259	0.697552577	9.1	10.10381
1.168089373	1.455578579	0.30856849	3.214882846	0.44188985	9.05	13.178986
2.009961318	2.200021409	0.77605602	4.515151592	0.627516056	8.25	6.339265
2.081275046	2.316982711	0.601833527	3.343656914	0.680950342	9.75	8.034109
1.675980743	1.891839459	0.352348286	2.522588181	0.271512158	8.2	7.817704
2.015089863	2.269202299	0.560109614	3.155741275	0.606078757	9.3	8.767853
0.928305256	0.924836696	0.029455726	1.159216059	0.090091458	10.5	9.860711
1.787001591	1.877023086	0.623403529	3.319794855	0.482423986	8.75	6.326032
1.296749331	1.787000606	0.014858347	2.38170434	0.47202062	10.75	15.431667
2.124004736	2.350530022	0.736191754	3.589842766	0.707732008	9	8.080538
1.535781417	1.854392336	0.313558324	2.722918247	0.678790213	11.75	8.918891
1.093900772	1.720813912	0.378695343	4.209457362	0.932639049	10.25	16.365389
1.158452861	1.678966039	0.512774614	4.750612261	0.941274717	10	15.207164
2.239335515	2.240607528	0.817044305	3.168439976	0.689644872	9.95	14.178416
2.067718406	2.065656812	0.938677088	4.049042568	0.74163298	9.25	9.567191
1.064864335	1.394166771	0.076929859	2.170628481	0.381949134	10.75	10.098904
1.333565846	1.856649037	0.270118959	3.641375155	0.643238824	9.5	15.648414
2.036226715	2.118618086	0.695317486	3.242934575	0.535591237	8.9	5.055783
1.527566291	1.652614682	0.435721639	2.542686682	0.306277989	8.25	9.98939
1.572374668	1.940187539	0.33658893	3.266539905	0.573276257	9.75	9.745608
1.844464425	2.055384863	0.47749041	3.066120088	0.591135314	10.15	7.021446
2.148455721	2.227345953	0.706882605	2.773222522	0.406557893	8	8.554186
1.076891294	1.649115913	0.081021652	3.190977509	0.320704966	7.55	6.372689
1.221451028	1.584230241	0.412433539	4.119433243	0.708035016	10.25	14.016769
2.493454917	2.39371297	1.218094607	4.281282964	0.830538488	8.8	8.445242
0.6345343	1.121729565	0.025127699	3.027566718	0.413151675	9.35	17.124229
0.824591066	1.348889033	0.370280553	4.522374591	0.785627457	9.5	17.071754
1.318237629	1.537946119	0.806109206	4.431703482	0.973046607	10.45	12.59263
1.325047135	0.931795419	0.538561007	1.529691372	0.117017351	10.5	18.133926
0.048010031	0.867483636	-0.525694753	1.98330238	0.277592517	10.75	18.972279
1.382223296	1.966101665	0.128542635	3.379419042	0.499138684	9	8.6013
1.075711318	1.703551143	-0.245989189	2.166562682	0.266717915	9.75	7.31394
1.259375957	1.496464714	0.355729252	2.918566313	0.54140655	10.55	16.921172
1.946797784	1.998424913	0.619181371	2.924992961	0.363235681	8.25	5.553502
2.384808783	2.469473382	0.765357009	3.277679239	0.683124835	9.75	8.034109
2.6282515	2.373599681	1.206744942	3.899194091	0.728043112	9.25	10.400068
1.627880794	1.802612408	0.559150359	3.819780237	0.657443955	10.25	6.462468
1.526250328	2.122557454	-0.041515729	2.104346472	0.400060773	9.65	7.995665
0.909261912	1.487217328	0.312463938	4.431502184	0.808914762	10	14.917522
1.591230002	2.036874617	0.387185079	3.703878245	0.731376721	10.1	9.162559
0.396358717	1.529191346	-0.818364081	1.759768081	0.229005541	10	11.256445
1.524962847	1.915223335	0.308173087	3.008245395	0.533541337	9.4	8.374058
1.900462364	1.969100947	0.866446748	3.683249077	0.850486817	10.25	14.331622
2.194595648	2.206237256	1.231850265	4.872744626	1.192195991	10.65	14.963951
1.135219716	1.607983565	0.569857425	4.879468739	0.974436302	10.25	15.916267
1.750927986	2.012507887	0.474514644	3.042945759	0.475766989	8.65	9.846908
1.107614072	1.502112526	0.227420571	3.374101997	0.532178801	9.9	9.293976
2.596205085	2.507143702	1.072546605	3.701943469	0.746829656	9.25	7.292037
0.970786479	1.204848915	0.441487031	3.534400132	0.675817063	11.15	12.357403
2.408648834	2.432044743	1.010639758	3.429591326	0.697937777	8.5	14.107232
1.450104846	1.763779003	0.615497648	4.566172919	0.74288684	9.05	8.737622
2.350748671	2.25365863	0.901296237	3.266640814	0.585385009	9.2	9.006502
2.090861667	2.141825549	0.918667424	4.137209153	0.899653684	10.45	10.478895
1.75870548	2.027816772	0.305039539	2.328845548	0.536313898	10.75	9.008555
1.891496265	2.083543881	0.839566459	4.181026618	0.938073693	10.2	14.462582
2.43006481	2.4815293	0.950373279	3.823022919	0.553931809	7.85	8.025781
0.860675216	1.356886088	0.393745575	4.715794068	0.832419018	10.25	16.406342
0.993246758	1.804701968	0.09286731	4.006544628	0.734239125	9.35	15.631644
1.344621512	1.38622424	0.3766146	2.41701205	0.389737914	10.7	7.465206
0.731693751	1.201977384	0.122349035	3.062019018	0.620142139	11.7	16.568446
1.749371998	1.975694193	0.353284132	2.237057682	0.39839261	9.3	9.545288
1.813424264	1.893500055	0.643791039	3.433511562	0.518460318	9	5.386493
0.340172067	1.328232467	-0.782615024	1.905804147	0.280493842	10.75	17.235911
1.49019726	1.73798896	0.541534527	3.523933635	0.646122334	9.5	12.299566
2.612302286	2.360418851	1.193505516	3.922918006	0.629733537	8.6	7.371435
1.326652572	1.618776593	0.720175861	4.4965829	0.943657242	10.25	17.271503
2.208936793	2.26121955	1.024639835	4.727676739	0.831625942	9	9.244581
1.009077078	1.967138568	-0.275742085	3.287648439	0.427071397	8.25	5.660278
1.106229812	1.602926083	0.322765983	3.869329015	0.84288289	11.5	14.511749
1.417964412	1.544952966	0.12882814	1.649157641	0.097596888	9.1	8.056354
1.574323415	1.923234208	0.279760725	2.880627254	0.13020473	7.25	12.368583
1.302078714	1.17361911	0.494848562	2.48815032	0.133789953	7.6	7.916381
1.764460492	1.990305227	0.330100531	2.486630456	0.337989229	9	8.496691
1.876196635	1.796914548	0.693842678	2.919548696	0.393418333	8.75	6.897786
1.445392156	1.888588017	0.480194633	4.410182924	0.745121947	9.25	9.646589
2.195936501	2.135707742	0.966084286	3.833735212	0.733352361	9.5	6.580196
1.676757698	2.014400925	0.40356236	3.066061279	0.600010215	9.7	10.717659
1.627255289	1.896821549	0.289400478	2.717767263	0.459807463	10.05	8.797969
2.449213368	2.402827582	1.079352959	4.094926351	0.62387575	8	8.781884
1.712994626	2.042594961	0.209595695	2.515391606	0.427254846	10	10.314738
1.293116168	1.735735187	0.377872163	4.277412404	0.746889026	10.25	7.935888
2.016417627	2.042007124	0.810192439	3.988759437	0.578489539	8.7	6.57472
1.901723405	2.040814245	0.921772215	4.328948646	0.778912308	8.5	14.233059
1.180509227	1.82431392	-0.239418709	2.013575451	0.361368463	10.65	10.974903
1.437669932	1.566133248	0.688553821	4.163443473	0.839900187	11.5	11.256787
1.339582402	1.807959251	-0.139246333	1.62900185	0.374433774	11.75	16.622746
1.937956659	2.115074557	0.82867726	3.82848524	0.90045145	10.1	9.17294
2.050427569	2.138773213	1.010279997	4.944199637	0.970161393	9.9	13.643851
1.228660075	1.794517869	0.403610495	3.91458205	0.880133955	10.1	15.612365
2.008763832	1.788371759	0.889125454	3.206922116	0.513869433	9.4	8.157198
1.561971807	1.85946076	0.392817283	3.25279965	0.60218826	10.15	11.103582
2.167746918	2.227553552	0.887497557	3.975265984	0.679791785	8.8	7.67545
1.727724832	1.97945035	0.665434524	4.229775069	0.902762773	11	12.844969
2.125911212	2.251026733	0.75430382	3.477709019	0.635228406	9	9.504791
1.507641314	2.014903488	0.362701677	3.974252419	0.492586689	7.75	6.180584
1.872531119	2.114289776	0.402510071	2.670362638	0.414910992	9	8.751996
0.269152579	1.276271027	-0.267346122	4.164462232	0.653516886	9.75	15.473305
0.75730982	1.637951876	-0.363455619	2.894080841	0.505273011	11	11.070385
0.466959582	1.061608153	-0.04702144	2.897993416	0.502610674	10.25	16.836185
0.490539082	0.731200051	0.129046187	1.914603968	0.071507843	7.25	11.916381
1.315371316	1.332432848	0.416705648	1.842347306	0.228695614	8.25	13.9449
0.285297965	1.082972061	-0.561417195	1.740443034	0.150832447	9.55	15.265343
0.900718534	1.442578513	-0.181557016	2.005342131	0.237120622	9.4	13.324093
1.886179423	2.073311157	0.542942417	2.967044283	0.505161767	9	9.909993
2.112461476	2.137828951	1.048671833	4.852592837	1.034149663	10.75	11.886721
1.547534971	1.436561676	0.52518544	2.211455506	0.317123628	9.75	8.666438
2.250905595	2.225169322	0.842466478	3.40359117	0.660857784	9.7	8.441934
2.03039921	2.050938039	0.705410043	3.208235878	0.643758071	10.3	10.594455
0.853161012	1.563907181	-0.013142284	3.491775928	0.456906655	8.25	15.021104
1.788934471	1.973310767	0.522838503	3.593771078	0.531640679	9.35	6.328313
1.923765874	2.077228942	0.634443973	3.259507701	0.674067797	10	8.882728
1.725420595	1.911112085	0.319635478	2.209684585	0.313092485	9.2	12.598562
1.812593546	1.932713374	0.678937529	3.941247692	0.717102535	10.25	12.406342
0.761582611	1.445249456	-0.189741664	2.516242904	0.30605403	8.75	10.654574
1.344122243	1.263271811	0.427299076	2.108631203	0.292880836	10.25	11.971024
2.36977565	2.343349424	1.113794845	4.36049405	0.898094036	9.5	5.564453
0.785040247	1.454034925	-0.273479418	1.865034085	0.204120347	8.6	9.490531
1.405065858	1.896286505	0.30638238	3.670453295	0.64942127	9.55	10.088067
1.422244465	1.879979484	0.314615922	3.369121785	0.620503193	9.5	9.65754
2.377806836	2.375144825	1.019058807	3.676059126	0.642378488	8.2	8.296828
2.010384888	1.998905559	1.052712536	4.368065151	0.91603312	9.85	7.839721
1.993595005	2.225918232	0.62638201	3.441335344	0.610707109	8.95	10.123545
0.460424648	1.111847337	-0.149787108	3.308480832	0.47488281	10.65	17.176249
1.711468994	2.096131799	0.526526215	3.892544855	0.817115732	10.2	8.422997
2.701192606	2.490378037	1.207660365	3.61604198	0.697718625	8.85	5.339949
1.623273818	1.923042792	0.526120008	3.792637292	0.540375762	8.375	5.884668
0.769973633	1.557367661	-0.477567504	1.970865886	0.101636778	8.65	11.172142
2.138830538	2.192573004	0.748116594	3.157803329	0.653676309	9.75	8.274925
0.079175174	0.764731454	-0.557855725	1.135813841	0.095977394	10.45	15.765799
1.437355512	1.655884824	0.554242508	3.920490913	0.741874747	10.75	13.477412
2.101450868	2.177423114	1.112644287	4.88384442	0.853494528	8.25	11.766141
1.675992887	1.713856391	0.56189993	2.725151352	0.388842958	8.75	7.382386
1.78565745	1.885114107	0.533692449	2.922393794	0.46574039	9.35	7.434976
1.9049283	1.703459493	1.282011485	5.254297806	1.008309142	10.25	10.586128
2.747750723	2.504769603	1.38472263	4.301030538	0.833485112	8.75	8.74036
1.150207168	1.586417517	0.737414404	5.275855676	1.045488288	9.5	12.729523
1.421030795	1.860397134	0.106413006	2.888430482	0.466891021	10.25	11.922313
0.978801998	1.529734106	-0.211717234	1.959084355	0.163966942	8.9	8.493953
1.903855931	1.728209273	1.131785013	4.587491301	0.722313352	8.55	10.931211
0.957504239	1.079446888	0.166802243	1.84054005	0.215791604	9.75	9.942162
1.865957532	2.044950471	0.334262091	2.62458404	0.100744604	7.55	7.651266
1.22647564	1.657187055	0.049427996	2.369886184	0.149353055	7.5	10.68971
1.118226878	1.595421927	0.596736948	4.818563721	1.006279689	10.25	17.328998
1.587976765	1.589060714	1.113775411	5.100322577	1.088838478	10.8	12.910677
2.376917785	2.307899978	1.069174669	4.345940188	0.72984696	8.85	7.577458
0.910966126	1.112108217	0.079371279	2.102864778	0.267622165	10.9	21.33185
0.840620478	1.373539019	-0.013610495	3.169577521	0.49367925	10.75	17.556696
1.863763946	2.046608434	0.779325603	4.297883785	0.923982526	10.75	9.723819
2.525200318	2.401302918	1.111103995	4.101698949	0.760541606	9.25	8.239904
1.532767896	1.521218478	1.036039572	4.800799989	0.921754701	9.75	13.099703
1.903878376	1.905218807	0.886267741	4.095811694	0.78319567	10	8.499543
1.207167489	1.733986685	0.117647831	2.772293475	0.420382294	8.85	12.990075
1.525606893	2.090872543	0.049856222	2.462267173	0.443961048	9.5	13.523385
1.682583509	1.856387314	0.785912354	4.310288678	0.92507792	10.75	7.798539
0.657992979	1.282565099	-0.289242273	2.017467865	0.348702881	11.25	16.414556
2.077641677	2.257865778	0.663684292	3.421511304	0.53188127	8.5	9.912845
1.425518457	1.896676159	0.321231818	3.268873542	0.613357512	9.25	10.164499
1.36311908	1.778559581	0.783117145	5.207182139	1.118585307	10.2	20.998174
0.772920397	1.429696012	-0.356727973	1.812834774	0.036545626	7.8	8.253479
1.367560309	1.743678515	0.537508644	4.039344468	0.900944435	11	18.736367
1.642594002	1.902904754	0.543165078	3.498201425	0.789635305	11	12.034565
2.154641681	2.153079294	1.119539765	4.437075049	0.913936533	9.25	8.89368
2.423045558	2.362845328	0.988817968	3.332634004	0.79912574	10	8.760095
0.930916947	1.503697281	0.436978461	4.691093294	1.00214682	11.05	13.832877
1.944890967	2.07017081	0.799271426	4.163112425	0.729142668	9.25	8.42334
1.721844186	1.948799094	0.57261162	3.612795897	0.474074248	8.1	9.061145
1.874163715	1.900210504	0.766739369	3.499811234	0.664198452	9.75	8.425393
0.4546728	1.208116301	-0.469812932	1.866931289	0.293184088	11.35	17.261008
1.418751727	1.483989627	0.391830639	2.619701108	0.375740837	10	12.666438
1.893062431	2.097627965	0.559199682	3.194556729	0.460201425	8.4	9.392083
2.212437321	2.270671747	0.852080863	4.142796007	0.732541261	9.55	7.231918
2.199667629	2.203985974	0.748814548	3.106155018	0.592634932	9.65	6.887405
1.849680309	1.709268262	0.891200798	3.568071848	0.661470607	10.05	6.55065
1.526210708	1.919303855	0.0656649	2.008892961	0.343789454	9.9	9.550878
1.923953989	2.121776574	0.613708219	3.871607194	0.736747526	10.4	7.648528
2.482660634	2.362142476	1.028502986	3.795858322	0.617281232	8.75	7.483801
1.444326462	1.734886186	0.693491732	4.132460879	0.875559005	9.85	13.816792
1.254178655	1.752092983	0.143008392	3.146765055	0.43427318	8.85	8.658339
0.063348746	0.680527294	-0.248911625	2.372888757	0.355568997	10.75	14.353639
1.267371679	1.801446794	-0.131055451	1.883583035	0.202336633	8.95	6.145334
2.25230715	2.035619491	1.067595262	2.870612473	0.656264969	9.25	13.167465
1.167422312	1.62188393	0.090373702	2.759192558	0.495590344	10.5	13.113278
0.202866784	1.322876012	-0.599263012	2.769845654	0.34950502	8.65	8.882842
1.630697293	1.853952064	0.544641671	3.900562877	0.711605223	10.5	9.7731
1.574339153	1.771873066	0.454447954	3.331244638	0.246823377	7.3125	6.947068
1.580163897	1.753286726	0.568109191	3.573755077	0.5757349	9.25	10.884097
2.165139512	2.254145252	0.69915014	3.10510056	0.501782172	8.75	6.3201
1.738128649	1.884434777	0.87769784	4.634458683	0.792090791	8.75	7.634839
1.079100682	1.473385935	0.600270693	4.535641106	0.935296771	10.3	15.974332
1.452699161	1.851819811	0.40740375	3.274903563	0.671609258	9.65	15.413073
1.718718315	2.018659207	0.552087506	3.599561244	0.814362336	10.75	10.36402
0.95072391	1.369958987	0.419626748	4.247951024	0.858878539	11.5	13.632899
2.521420725	2.426779636	1.205869895	3.797559154	0.819584518	8.8	7.361168
1.542153326	1.893165739	0.361000451	3.435107613	0.35743632	7.75	6.443303
1.943641808	2.030784874	0.904775942	4.161872431	0.679365746	8.25	6.333903
1.260157072	1.48860996	0.66118085	3.936938061	0.830391679	10.3	16.075633
1.233841214	1.768431382	0.431873253	4.24408832	0.912768852	10.5	15.179785
1.39789304	1.626415188	-0.044907351	1.011541085	0.125561187	10.4	7.732831
1.440097092	0.946992097	0.674005429	1.69925946	0.15214708	10.5	14.106548
0.478334428	0.841038412	-0.076102677	1.930458863	0.320583152	12.1	12.321925
2.194827502	2.378092147	0.768443641	3.73182388	0.679938076	8.9	5.392539
1.30533848	1.804823715	-0.00096373	2.398887456	0.223172973	8.3	10.881359
0.647451988	1.011207378	-0.100227356	1.696031467	0.314429558	12.3	12.989504
1.786541124	2.016978482	0.838969201	4.690452608	0.784126089	8.45	8.584759
0.667421522	1.400498788	0.019809196	3.955316626	0.658235218	9.75	17.884668
2.318112593	2.431075926	0.829297207	3.898042223	0.745900203	9.5	9.679443
1.695028473	1.216860789	0.938395075	2.90799706	0.423280061	10.5	15.793634
1.859168219	2.144283436	0.680229556	3.92090377	0.607208175	8.05	9.862879
1.946431239	2.048636901	0.844403808	4.257331229	0.548268459	7.65	6.788501
1.193082852	1.12389492	0.514682239	2.618179437	0.388992348	10.1	11.317248
2.329760183	2.397608649	0.932917711	3.820419745	0.927968008	10.5	12.118982
1.73322292	2.146243092	0.344352828	3.322803988	0.427049838	8.25	10.881473
2.060769345	2.200951421	0.890937225	4.701794831	0.853346341	9.5	12.477983
2.014390926	2.017586639	0.796121727	3.724407523	0.488795487	8.25	9.838809
2.056211538	2.039329099	0.871354571	3.734848091	0.792552342	10.5	9.061145
1.786757569	1.926428317	0.556891707	3.336357587	0.668787171	10.85	11.016084
0.341502515	1.265941476	-0.289867395	3.295824749	0.432104357	8.3125	9.736938
1.717164687	1.963808733	0.795972366	4.177182583	0.879671635	9.5	11.240018
1.24454234	1.518741496	0.411280735	3.480150258	0.515641631	8.95	7.147501
2.068105642	2.203509315	1.097760913	4.183804977	1.072440786	10	6.49806
1.925237363	2.183372253	0.187341428	1.532865505	0.477377956	11.5	14.991558
1.708128796	2.108411105	0.373411018	3.318295437	0.544025735	9	8.370864
1.251170906	1.728357518	0.502819556	4.291361554	0.816862178	9.25	17.07164
1.36462283	1.766160308	0.435781881	4.088538213	0.717955263	9.75	12.85535
0.816110247	1.383037673	0.059424887	3.373237366	0.550557123	10	11.516541
1.192319062	1.579210659	0.298473973	3.370036448	0.548844571	9.4	12.882728
1.531005434	1.453331535	0.710540291	3.597693335	0.534644502	9.75	8.773785
2.144860841	2.049194072	1.007899079	4.285525738	0.805153221	10.05	6.994182
1.927787059	1.968825271	0.481839662	1.95578519	0.285854621	8.8	10.807894
1.63631272	2.016117082	0.253479522	2.918005727	0.486169062	9.65	8.203627
1.210777991	1.336304436	0.808001416	4.896476866	0.876863175	10.25	16.926534
1.913239947	2.156871728	0.593792623	3.59489194	0.584447301	8.85	9.066278
2.402622064	2.431280461	1.075044269	4.246665015	0.907325809	9.5	10.421857
2.565693028	2.38633933	1.284295947	4.63095806	0.775160645	8.5	10.252224
1.294965534	1.554999981	0.722988602	4.976087821	0.877930004	9.75	14.024298
0.888450991	1.55405625	-0.162037245	2.668045783	0.343839495	9.1	8.16872
1.427529073	1.673128944	0.835634698	4.666662995	1.110453666	11.6	13.460871
1.703390777	2.037895629	0.738299786	4.522537875	0.676833778	7.65	15.084531
1.549567201	1.927607758	0.670624951	4.735506022	0.966927184	10.25	14.347592
0.99286755	1.584348238	0.054328309	3.099364103	0.517839668	9.5	10.556011
2.049732516	1.977112848	0.967515629	3.515728579	0.775847233	9.9	12.507757
1.707259509	1.926764793	0.403093656	2.561623807	0.455802549	9.4	7.242756
2.04792267	1.961315926	0.776278207	3.070775479	0.546711873	9.65	8.53023
1.468383439	1.983720483	0.116544685	2.764755435	0.48206791	9.6	9.162559
2.536846878	2.549844336	1.051433112	4.280649709	0.629778069	8	8.671914
2.166094546	2.224452817	0.710610193	3.034310313	0.647060848	10	10.528747
1.778459922	2.186496715	0.444071923	3.42231253	0.657631787	9.35	7.073579
1.061197322	1.67825397	-0.260441857	1.911888435	0.297647643	10.4	13.61978
2.000239344	2.063197115	1.087641765	4.585509277	1.083018899	10.45	14.271389
1.95445226	2.119785924	0.463594897	2.507035055	0.386347358	8.9	6.325576
1.697254074	1.988362969	0.399601219	2.944752012	0.586814993	10.05	10.131759
1.988745758	1.96081132	0.682276828	2.725090361	0.561779906	10.15	6.126283
1.597137202	1.796615502	0.772883822	4.372217878	0.967079363	11.1	16.217545
1.013518962	1.503927359	0.120905206	3.154870115	0.489839946	9.5	11.092744
1.980001464	2.167127267	0.605163899	3.46328998	0.587729138	9.25	6.03582
1.612701968	1.803181986	0.766182395	4.724174084	0.811017672	9.5	16.861396
2.531871369	2.234802843	1.292236073	4.179370715	0.833061671	9.65	5.929044
2.180077004	2.258790733	0.679445425	3.014222425	0.438727861	8.45	6.509012
2.110868856	2.154007986	0.806263992	3.523872022	0.596967848	8.85	7.4295
2.106900103	2.009774703	0.873103372	3.625670514	0.58627031	9.25	8.039356
1.420183812	1.882855727	-0.005784229	1.967842986	0.527424868	12.05	13.851813
1.030791027	1.622952021	-0.43795842	1.247517124	0.160388206	11.25	8.406456
1.959927262	2.230146965	0.574393692	3.736991255	0.658301698	9.45	7.106319
0.840234062	1.619941796	-0.089747212	3.505492633	0.490597906	8.75	11.858772
1.362540969	1.671255411	-0.067539346	1.198808957	0.149584588	10	7.773899
2.081816108	2.033509057	0.796808996	3.091046943	0.723238647	10.9	8.291923
2.083773645	2.079659198	0.76579035	3.121826269	0.783051636	11.4	8.41467
1.298828545	1.64066751	0.166645477	2.314480892	0.418570256	10	14.616244
1.920611322	2.172727789	0.351575313	2.176690767	0.516949062	10.3	14.175564
1.519828985	1.734008709	0.63793864	3.861769208	0.866238105	11.35	12.445357
1.974124234	1.934714524	0.446602521	1.822946974	0.186372468	8.9	8.157084
1.167513822	1.36409541	0.450301735	3.611083828	0.572126234	10	12.393223
1.54230785	1.866424575	0.404808788	3.700979897	0.578172608	9.5	12.949007
1.77727415	1.901319162	0.500225075	2.960664039	0.361516138	8.5	5.674081
1.874138875	2.051303986	0.616958943	3.731791661	0.707140513	10.25	9.022701
1.825612521	1.955840419	0.71377077	3.780266222	0.603297759	8.75	8.212069
2.607652034	2.420497204	1.356155408	4.832327022	0.834498506	8.5	10.013575
1.709857976	2.147364811	0.360798358	3.56933771	0.481317168	8.35	7.700547
0.839702675	1.454626891	0.002880441	3.872605613	0.607224622	11	14.816221
2.297677749	2.243085927	0.952107534	3.578840543	0.526547743	7.75	7.541295
2.01193507	2.123513843	0.708235514	3.560101214	0.703438473	10	10.374857
0.642381524	1.356533483	-0.18751401	2.055379578	0.303471761	10.75	13.775724
2.396702404	2.469503772	0.769612606	3.190035966	0.501139411	8.5	9.13461
1.085194342	1.199508722	0.596642975	3.736629425	0.674536883	10.5	12.904631
1.755810496	1.932356206	0.85372759	5.081356202	0.971601509	10.5	9.082477
1.286343033	1.823277042	0.408019267	4.190082523	0.797685439	9.5	12.07837
1.096489124	1.506943082	0.418703874	4.401182027	0.703363544	9.45	14.55065
2.067288202	2.046527179	1.064138691	4.388828379	1.028492524	11	10.95859
2.160972254	2.115325353	1.039508052	4.206721596	0.758456702	8.95	9.400866
1.967788071	1.992753914	0.763648173	3.357459634	0.617946182	9.45	6.818275
1.720653346	1.736716255	0.732566228	3.586314447	0.452945947	8	9.928701
0.606360585	1.319677899	-0.144950918	3.133116765	0.512406744	10.25	14.520533
1.921106273	2.067985464	0.714382073	3.48590843	0.606758915	8.75	8.212525
1.924620527	2.099252432	0.714856418	3.636765423	0.605984663	8.55	5.214008
1.53530348	1.81769884	0.468295212	2.99489688	0.613577299	9.6	13.658224
1.522505057	1.885019505	0.526841209	3.863682195	0.867335027	10.9	10.303787
1.638495921	1.858259182	0.61299592	3.912438765	0.657353449	9.25	7.664955
0.568882726	1.287981337	0.229551592	4.889976557	0.894034612	10.25	17.953798
1.370095786	1.501444476	0.541106029	3.524183773	0.375090621	7.6	7.486995
1.723520595	1.884265776	0.857417381	3.954396405	1.021079341	11.2	10.758726
2.677817266	2.575254843	1.158799341	3.931262094	0.617789034	8	9.76443
2.336254331	2.173798178	1.226023804	4.429972186	0.802123779	8.8	10.248916
1.547322537	1.624379605	0.797716861	4.192445455	0.809463884	10.3	8.382272
1.635268229	1.866217857	0.429053869	2.95434768	0.646429809	11	8.472621
2.233844386	2.169488276	0.846936189	3.139769134	0.565633527	9.15	6.53696
1.128564998	1.726025395	0.39037769	4.456675811	0.914647666	10.25	14.966233
1.689555015	1.999674954	0.552078809	3.051941169	0.466169582	8.5	6.45973
1.702676744	1.978543916	0.709476027	4.614781425	0.876912232	10	13.830025
2.034756686	2.168499739	0.671294363	3.43204758	0.531506397	8.7	9.986652
1.597124233	1.836116293	0.403275327	3.050928906	0.532232066	9.9	16.715833
2.180655362	2.16371554	0.998038396	4.233889032	0.88934833	10.25	8.885352
1.759908892	1.988508142	0.981875768	4.93157099	0.935671935	8.5	14.473534
0.298927712	1.119399522	-0.238952284	3.088543626	0.573377722	11	20.664271
0.762218817	1.492903671	-0.101958025	3.298323182	0.583398057	10.5	14.974446
2.104377121	1.896201896	1.061413577	4.40518046	0.795664307	10.5	8.280857
2.041522401	2.085840838	0.675007945	3.039997822	0.550719424	9.5	5.337211
1.702655177	1.875149345	0.805544013	4.230193279	0.845902102	9.7	12.775952
1.393854605	1.10781118	0.501377941	1.720528518	0.140464257	9.75	5.247547
2.11432086	2.12247615	0.676378518	2.972076071	0.490062653	9.3	7.075747
1.874394756	2.019077454	0.704443587	3.757167932	0.505369922	8	5.76443
0.546542402	1.321772253	-0.365361881	2.209870722	0.273272757	9.1	10.925621
1.659873316	1.859877339	0.397889216	2.429277115	0.442828241	9.45	6.39174
1.311840687	1.997673771	0.11260716	3.319758832	0.653237901	9.65	10.298311
2.409102628	2.383444856	1.117572605	4.253626889	0.961293911	10	9.230549
1.969764914	2.067040044	0.887786003	4.187740975	0.887095016	10.15	10.719826
1.714776478	1.881551747	0.68261952	4.028732968	0.792265564	10.5	9.627652
2.010013954	2.238445057	0.816142307	4.1423681	0.585489851	7.5	8.003878
1.125264739	1.562561052	0.858310727	5.416140434	1.301562501	11.25	18.482203
1.760205572	1.651354986	0.800089217	3.31564461	0.512099969	9	7.694501
1.56690674	1.569950133	0.64441383	3.5353272	0.472378762	8.95	7.784964
1.697951887	1.647152763	0.848462065	3.774718207	0.747650731	10.5	9.348733
0.94313822	1.630765551	-0.274649753	1.97658813	0.187612948	8.5	7.57723
2.002713689	2.204245815	0.837579823	4.781031327	0.890140304	9.75	9.832762
1.007088985	1.42497881	0.47760233	3.709031176	0.744678994	9.05	21.899041
0.90651303	1.482327591	-0.276922833	1.817069831	0.093187157	8.5	11.612936
2.035258838	1.977579769	0.992323356	4.034702489	0.697149657	8.8	10.580766
1.775543812	1.977662913	0.583320264	3.557967933	0.814335347	11.5	7.67796
0.613634481	1.218314076	0.048653225	3.692979351	0.59305841	10.1	13.504334
2.285806979	2.201124044	1.087427855	4.151036943	0.590489965	7.75	16.764887
2.152375182	2.303117002	0.805640781	3.928121298	0.665974518	8.7	5.616472
1.865342414	1.869442534	0.971702112	3.792600314	0.873910292	10.05	11.169176
2.161501412	2.283731074	0.76087441	3.681054527	0.572775542	8.55	9.255076
2.498602635	2.379730076	1.083531497	3.814430803	0.613325116	8.35	6.202943
1.025439636	1.128107433	0.097524258	1.575766721	0.173504475	10.65	11.689139
1.751552922	2.016034376	0.422858396	3.063062804	0.601851881	10.25	9.049737
1.79254211	1.672879508	0.539150746	2.099116263	0.251696258	9.15	7.333105
2.091721212	2.054423546	0.972078728	3.815579937	0.652359561	8.55	10.443303
1.242758706	1.110970456	0.568192728	2.637644067	0.29018512	8.6	11.708647
1.582272796	1.841984613	0.533773339	3.522975767	0.570073535	8.8	9.742299
2.264628017	2.261728873	1.02146879	4.266735859	0.594637532	7.75	7.620693
0.597927749	1.683960423	-0.436180399	3.407033885	0.513837175	9.5	8.710244
1.418443694	1.490633514	0.758810064	4.148933531	0.785740042	10.5	15.60746
1.849264182	1.96595012	0.881552722	4.243694297	0.934019669	10.45	6.511635
1.669039116	1.948451657	0.303809169	2.777245128	0.476439902	10	7.878393
0.451278718	1.346308666	-0.507425766	1.700128057	0.036169524	7.75	11.179671
1.340284678	1.69429592	0.258641685	3.15809631	0.498145712	9.75	9.80527
0.618380207	1.485512771	-0.358297796	2.229052805	0.573373359	12.2	18.129021
2.278914069	2.385425402	1.016739198	4.296840861	0.800844118	8.55	10.771845
1.768166022	1.945667641	0.505220753	2.943716212	0.595440241	10.2	10.928473
2.089091946	2.132531277	1.042885618	4.867299357	0.91407835	9.5	9.220054
1.83749244	1.903078357	0.971725473	4.495896098	0.857036167	9.25	10.582934
2.351563002	2.368761702	1.040586305	3.960311043	0.596476775	7.8125	8.510951
1.556376397	1.898211321	0.623820675	4.372511725	0.866285866	10.05	12.874629
1.384133045	1.420421553	0.329182116	2.42156089	0.006925444	7.25	9.463267
0.017854013	1.160728013	-0.324706668	3.996153104	0.768947795	10.25	21.816563
1.808611991	1.975868133	0.425040106	2.383720166	0.498308472	10.15	7.790326
1.003107366	1.660130511	-0.328452392	1.876991017	0.21637257	9.75	14.796942
1.521106784	1.747110592	0.282926885	2.475067958	0.413183062	10	8.932352
0.879695728	1.103066777	0.185891932	2.261585634	0.162480474	7.25	13.635637
1.206516649	1.55878341	0.742072539	5.118586688	1.047010234	10.5	16.075633
1.120082876	1.749867941	0.133995558	4.059744482	0.710649692	10.5	12.48574
1.961478221	2.074159995	0.754759629	3.876137186	0.534569955	8.15	6.437827
2.426548724	2.402237956	0.911693897	3.420663289	0.62678883	9	8.726785
0.689556774	1.570128711	-0.277429615	2.943424357	0.505514029	9.85	13.00924
0.854916951	1.506243757	0.531562715	4.886260873	0.991453941	8.7	19.335843
1.542432422	1.842555052	0.355624202	2.969579438	0.243523054	7.25	13.621948
1.156551368	1.114669372	0.321028226	1.939904948	0.141966361	8.75	9.312571
1.904357987	1.88669456	0.909326461	3.894084791	0.657775197	8.75	12.921172
1.510182932	1.9380892	0.351535981	3.511812327	0.622900923	9.5	13.840976
2.219844279	2.163582655	0.92862422	3.768705032	0.573364985	8.5	5.279717
2.717682301	2.605709968	1.191288093	3.827306654	0.758636858	8.75	6.276294
1.295882703	1.610726341	0.71052428	4.682583955	0.995313455	10.75	11.207278
1.232246357	1.877608061	0.066802588	3.208470473	0.514145656	9.05	9.736938
2.468053347	2.385752353	1.061535462	4.066049911	0.754037335	9.25	7.472621
0.943404565	1.353646572	0.113999334	1.937563977	0.46684128	10.25	11.582705
1.700746316	1.930189728	0.645142039	3.925918677	0.733521688	9.65	12.666438
2.438161008	2.358164233	1.290606377	4.707531908	0.841886198	8.25	7.519735
1.049360002	1.624827569	0.351452904	4.784755554	0.817108201	9.75	14.150924
1.943110326	2.168975407	0.505776025	3.225613171	0.596242452	9.85	15.062172
1.485001324	1.952136736	0.372498413	3.715040215	0.707700708	9.75	11.023842
2.037858266	1.809391593	0.812053451	2.698236304	0.461300942	9.75	7.672484
1.857900078	1.985171067	0.661503392	3.282637347	0.751733172	10.75	11.188455
0.740380618	1.072075818	-0.010382304	2.204685599	0.262559478	10	17.732032
0.604465056	1.574770281	-0.511790823	1.907931615	0.082920727	8.333333333	10.912046
2.038148155	2.25820587	0.84558853	3.983364902	0.899888456	10	11.724617
1.406300383	1.550360452	0.479323229	3.457865598	0.557641778	10.25	8.880561
2.277036318	2.22496639	1.091672929	4.53106324	0.732122428	8.5	11.530116
1.240038144	1.370340349	0.445483855	3.111378735	0.319131012	7.75	9.200319
2.317847719	2.285919862	1.01868798	4.133322044	0.770986429	9.25	8.209901
1.729466373	1.876361675	0.729129238	4.21338181	0.819052901	10.5	11.024298
1.463912294	2.047416652	0.518244288	4.648786201	0.831100474	8.6	15.289869
2.002734797	2.096803914	0.703633262	3.679311091	0.539653407	8.75	6.330937
1.005308735	1.524737334	0.464208343	4.359844419	0.668066773	7.45	16.034109
1.306418336	2.085160993	0.117245546	3.74468864	0.505452307	7.75	6.868126
1.571449211	2.06375084	0.445546507	4.107433486	0.798371697	9.75	7.845083
1.595667217	1.573822177	0.623754788	3.322267671	0.535173355	10.25	11.758042
0.833755873	1.311440494	-0.213725466	1.709630216	0.323554791	12.25	14.172256
0.900996576	1.161247246	0.284582014	2.949151607	0.499139899	10.3	13.745151
1.636006651	1.672210447	0.720540708	4.294233264	0.685836053	10.25	8.765001
1.302366259	1.758089899	-0.024257627	1.930717428	0.326333735	9.9	12.606319
1.799358764	1.999463608	0.632682311	4.038265106	0.795479262	10.75	10.725758
2.213280955	2.139685678	1.06429414	4.415466226	0.846090447	9.75	10.985854
2.139943462	2.155333835	0.950680898	3.68970048	0.905737085	10.55	11.256445
2.319317187	2.257271888	1.038627624	4.233934939	0.632596802	8.3	6.816107
1.090527996	1.676473756	0.197652049	4.161738035	0.625351258	9.25	15.617841
2.28583505	2.259016096	0.809735836	3.237766163	0.606373037	9.55	8.138033
1.557198307	1.379831252	0.51562965	2.129893429	0.176643447	8.85	11.856148
2.464790378	2.369173413	1.188484175	4.405153563	0.956637408	9.95	9.34052
1.29280063	1.750784527	-0.16312085	1.558327095	0.201577632	10.125	8.910107
2.06491409	2.316915203	0.396864495	2.801127956	0.125547922	7.416666667	10.046315
2.006293999	2.154518606	0.494888519	2.403863575	0.396951107	8.9	8.204312
1.733432728	2.116727694	0.085472513	1.733159025	0.336752371	9.85	15.908624
2.169734348	2.025297489	1.237211716	4.288229646	1.10456538	11.3	10.054528
2.035904928	1.950385078	1.035425786	4.273647909	0.743661567	9.05	5.701232
0.172621843	1.068081154	-0.629765296	1.650056953	0.274054461	11.35	17.066621
1.736706239	1.958981248	0.645956297	3.722686281	0.527277746	7.95	6.030002
1.193975719	1.760021705	0.408349957	4.936188319	0.9535546	10.9	12.392653
1.860052581	1.937792257	0.848036641	4.357763744	0.742863258	9.25	9.351471
1.500605912	1.739647332	0.82320112	4.84846282	0.988474494	10.25	15.366529
1.985257056	1.881702607	1.122194253	4.931279988	0.938848043	10.25	12.058635
1.69719977	1.510219305	0.796291219	3.303035282	0.458060278	9.15	6.990987
1.722046669	1.884676644	0.79403374	4.288601879	0.867451518	10.15	8.124914
0.80491845	1.143611011	0.444606066	4.47220181	0.746041839	10.45	11.886151
2.683112205	2.595803346	1.136495078	3.930485976	0.57174364	7.8	7.497376
0.401612233	1.510113423	-0.505707136	3.105166617	0.412651603	8.375	12.581679
0.689061182	0.84430658	-0.022655477	1.377735797	0.032712282	9	18.881359
1.266258125	1.64025229	0.183182676	2.781023697	0.424692089	9.5	8.094227
1.892224814	2.131136986	0.779989355	4.435634045	0.724387766	8.5	9.622518
1.599894282	1.911353221	0.497242627	4.163235901	0.654319732	9.5	7.949691
2.5042896	2.276965385	0.95716312	2.802903569	0.435530244	8.65	6.545174
1.07600676	1.824600261	-0.440383392	1.471998244	0.086841124	8.833333333	8.384668
1.387850434	1.72745365	0.851666666	4.898732244	1.138819511	10.5	14.88193
1.190104839	1.548347324	0.401386908	3.80038721	0.693973236	10.25	13.446725
0.817728629	1.619134454	0.290016467	4.614210563	0.989835187	9.85	14.771959
1.449033863	1.541874729	0.450153871	2.870185935	0.286192108	8.1	9.515742
2.314978699	2.226440146	1.112929643	4.589008763	0.95679008	10.5	10.175108
0.86327935	1.389806091	-0.082555592	2.736063925	0.38503778	10.25	7.828656
2.113576288	2.205089677	0.939274485	4.237401001	0.655362154	8	8.611795
1.944209081	1.988028441	0.979839468	4.772990432	0.986564303	10.75	10.063312
1.166765229	1.704537125	0.03607455	3.269074617	0.192500591	7.25	5.452772
1.297160369	1.418621401	0.281493829	2.020148165	0.30707882	9.75	11.111339
0.639480467	0.936065356	0.051609357	2.04741318	0.304641977	10.2	10.096167
2.04694818	2.229814027	0.460469636	2.709029432	0.570378654	10.45	6.651266
1.715997948	1.844704661	0.700697828	3.572159961	0.728308422	10	7.662103
1.273453764	1.718963048	0.177956685	2.889253868	0.474725245	9.4	15.582819
1.955228491	2.060245472	0.710970832	3.486378135	0.497225784	8.25	6.024982
0.827916079	1.158541739	0.13186602	2.755392991	0.265245114	8	13.7812
1.374129382	1.831513076	0.360964156	3.836185099	0.784173737	10.75	11.951859
2.075532461	2.145656775	0.853218207	3.897423553	0.702437799	9.1	7.136093
2.402417739	2.374444564	1.113821579	3.783840474	0.738053731	8.45	11.850673
2.236068455	2.336501643	0.697290543	3.029477907	0.589852242	9.35	9.337326
0.910724043	1.57865317	-0.266552651	2.074308646	0.151914011	8.2	17.805498
2.819511729	2.624426313	1.494925461	4.663330523	0.960986903	8.65	5.862993
1.044232522	1.404007278	0.107579785	2.618860758	0.411233692	10.3	13.59514
-0.090057055	0.800352503	-0.310020496	3.181886443	0.444125708	8	9.285078
1.442635236	1.527592287	0.965660733	4.866011689	1.018431173	10.7	13.167921
1.823334447	1.893171307	0.961933642	4.602359301	0.903822502	9.75	9.282454
2.061186441	2.027375808	0.517157939	2.080032843	0.346329235	9.75	6.539698
1.132253846	1.860373698	-0.095600492	2.991521452	0.456533621	9.25	9.920374
1.610630838	1.736534439	0.201427761	1.741190326	0.200326785	9.65	9.219598
2.230060403	2.217401058	0.841314776	3.705504257	0.522220355	8.5	8.297513
1.477439255	1.826223972	0.61260981	4.518371583	0.892576192	10.35	16.710814
2.420432029	1.958911911	1.218097852	3.705969963	0.692596723	10.45	10.944558
0.774579096	1.250077082	0.351119091	4.424236899	0.728863264	9.55	16.072324
2.172468421	2.067617702	1.030816932	3.78623881	0.838290904	10.25	11.352384
1.250839929	1.407622205	0.311413576	2.655521446	0.393972808	10.05	16.310631
1.391613768	1.7406276	0.43308299	3.946908894	0.745541021	10.7	14.095596
0.891627126	1.022977494	-0.017644849	1.392675477	0.152054763	12.05	12.997718
0.724118384	1.298301867	0.054991302	1.487310285	0.155161934	9.5	14.462468
2.368527485	2.105044011	1.209224071	4.455480025	0.856478262	10.25	10.799224
1.579543162	1.919683233	0.40135423	3.558102795	0.505243176	8.75	11.653319
2.67100355	2.430352969	1.301055361	4.260863051	0.908048847	9.85	8.250285
1.512088087	1.953545485	0.387923399	3.658096856	0.681510671	9.6	6.210472
2.444994653	2.317149226	0.941200519	3.402387129	0.626196725	9.5	9.731576
1.739075439	1.715177157	0.575057921	2.877281748	0.36509756	9	5.041409
2.381222612	2.450330273	0.78253485	3.177351221	0.505250224	8.45	8.373488
2.02860288	1.875655794	0.708943386	2.667045579	0.230847983	7.95	6.911476
1.659406302	1.823200274	0.321564045	2.233851467	0.123229374	7.416666667	7.886607
2.203968756	2.196900607	0.898291644	3.829455996	0.500457908	7.9	8.691193
2.005984021	2.070262257	0.697204712	3.365609231	0.631462052	9.85	7.875313
1.182357199	1.611311376	0.212783428	3.107935064	0.64432144	11.2	11.842915
2.183013142	2.281659531	0.735033627	3.011102218	0.559541324	8.8	9.540269
0.621115283	1.36114171	0.407781651	5.34177443	1.100002896	10.4	21.819644
1.186455041	1.687354354	-0.040852864	2.487477449	0.082544792	7.25	9.704654
1.600239188	1.858461856	0.192739954	2.062403092	0.411648948	10.7	10.755418
0.913036463	1.459253593	0.142060527	3.498424634	0.67766397	11	15.757472
0.534897511	1.296245977	0.125423575	4.342542278	0.891712483	11.25	19.349874
2.340023531	2.336954684	1.11629468	4.673584578	0.753550704	8.25	5.274811
1.28306378	1.773670723	0.206681994	3.463014651	0.57287692	9.7	9.291124
1.831069208	2.136687691	0.368495504	2.805894593	0.442326528	9	8.833561
1.573299918	1.878455271	0.172573776	2.156389697	0.442679125	10.75	9.375998
1.493246238	1.565858254	0.770555467	3.50196549	0.784068623	10.35	14.547798
1.773995367	2.019842191	0.418040599	2.963984507	0.384754113	8.5	6.996235
1.888001144	1.887872776	0.961074433	4.31178273	0.925720341	10.75	10.082477
1.918511683	2.13098986	0.832267284	4.012403685	0.7824893	8.75	10.476728
1.997905285	2.114577831	0.860121779	4.403780755	0.833882797	9.75	9.923112
2.466307855	2.488085437	1.09096942	4.488345786	0.791342755	8.65	5.463723
1.740628165	2.019870264	0.618293466	4.149802498	0.701046736	9.2	10.580196
1.689876959	2.239140619	0.136058412	2.106264626	0.318890331	8.1	6.411019
0.847943038	1.560624901	0.226713341	4.569881623	0.853867626	10	14.799794
2.082885556	2.13213887	0.949705195	4.376226499	0.820754978	9.45	5.701802
0.729771582	1.340970116	0.018648898	3.690736492	0.572984904	10.25	15.336413
0.283040401	0.646304169	-0.312272796	0.710641898	0.110453961	10.25	15.316678
1.74844711	1.956553989	0.618362167	3.690368368	0.743503285	10.25	9.031143
2.208302426	2.102170883	1.031374853	3.799946902	0.841359636	10.3	7.527948
0.572937092	1.339334437	-0.16640064	3.545585699	0.590255234	11	16.346566
2.269662243	2.179703119	0.889979564	3.391105425	0.563566676	9	6.019621
1.871214238	1.818813334	0.645812938	2.644564281	0.30758641	8.2	5.233629
2.001060169	2.176566162	0.658817623	3.45677892	0.664366003	9.55	12.110654
1.949366492	2.063881672	0.90386733	3.832686596	0.774778068	8.85	14.057266
1.828121836	2.05143754	0.733978461	3.504888989	0.801489724	9.6	7.850673
1.920700097	2.058892356	0.748302449	4.068171799	0.804207682	10.3	10.53696
1.346985375	1.747897093	0.185045377	3.497666956	0.326770809	7.5	5.548596
2.67542496	2.425872469	1.263990592	4.183710499	0.679193192	8.5	5.337668
1.776852211	1.98084368	0.239383592	2.062910306	0.306813232	9.5	6.333903
1.890760356	2.169888589	0.632068803	4.210243431	0.577234652	8.25	6.533652
1.385087292	1.581252314	0.015461385	1.257506258	0.182121899	10.75	10.824435
2.027633092	2.085903636	0.79414664	3.78921532	0.62613877	9	6.413187
2.455478899	2.58870228	0.959184865	3.861030041	0.607562631	7.75	7.412502
1.870055426	2.033131717	0.556896048	2.929420458	0.663036077	10.55	11.05989
1.463034908	1.701756431	0.890284786	5.029655976	1.035744242	10	14.255076
1.195914332	1.576408956	0.511215238	4.338905071	0.764381798	9.5	12.464407
1.584763581	1.636097371	0.670655065	3.394990545	0.607291678	9.7	12.984599
1.911961382	1.902887097	0.957900153	3.995733501	0.90394644	10.65	9.986196
2.106519762	2.287607756	0.739006555	3.578236563	0.624512568	8.65	8.713438
1.848528552	1.838462337	0.739166799	3.354375967	0.438469304	8.25	9.364704
0.885564127	1.435910294	-0.178048363	1.964331885	0.402093412	11.65	16.382386
1.895540166	2.028803481	0.678311522	3.771819612	0.556218365	8.7	7.905886
0.741908755	1.804261724	-0.504872706	2.464539587	0.511185156	10.6	15.724617
2.126700097	2.069345931	0.772701539	3.390329298	0.409271644	8.35	7.470568
1.14787376	1.49134153	0.542370977	4.347659793	0.822599866	10.25	11.738877
1.683742302	1.594744223	0.937501436	4.297969762	0.719694335	9.5	8.56297
1.576360676	1.70530719	0.452888028	2.806233398	0.462100677	9.7	7.741159
1.463075277	1.923020797	0.432216097	3.611073966	0.810617799	10.25	17.447296
1.779896443	2.130935068	0.485590153	2.938207738	0.698249144	9.8	8.597992
0.541590792	1.346888276	-0.35924568	2.489161277	0.3379184	9.083333333	7.736253
2.118670574	2.169414144	0.844211647	3.754273249	0.627970266	8.75	6.500798
1.24789735	1.786394657	0.175912075	3.611241616	0.540574768	9.2	9.506958
0.917241389	1.625213406	-0.226525619	2.148359985	0.363144031	9.65	14.361624
0.81347003	1.389441892	0.156723852	3.840519037	0.68408652	10.4	17.348163
1.021035713	1.614669155	0.047214534	2.935830494	0.632666077	11.05	17.042094
1.691564849	2.023848957	0.742099136	4.356637082	0.666572038	7.55	10.092972
1.976224138	2.120919792	0.493228135	2.973694187	0.48474512	8.75	9.487793
2.160834476	2.194443207	0.879044602	3.586323131	0.764344186	9.75	6.883983
1.892787291	2.04686463	0.658166358	3.530434781	0.730532689	10.3	11.204996
1.31500541	1.78814472	0.30314275	3.609928222	0.631851894	9.5	14.407711
1.655120812	1.39620424	0.684075893	2.66090828	0.273699361	9	9.102327
0.20954529	1.102997616	-0.614256979	2.328394702	0.032428313	7.25	7.226899
1.548299418	1.743427004	0.088185453	1.393712845	0.115838047	9.3	12.028975
2.134573443	2.088470378	0.999136998	4.218422569	0.817129616	9.8	9.622062
2.191245513	2.151257658	0.924334976	3.800451759	0.509634702	7.95	6.008441
2.639641192	2.6318684	0.903241756	3.046750734	0.647040322	9.25	7.966119
1.803276725	2.03310588	0.467483627	2.916750514	0.533096868	9.5	9.743098
2.14830887	2.012633549	1.052298448	3.744310834	0.987898306	12	10.890143
1.651567235	1.960364484	0.593844307	3.513896561	0.874348196	10.85	8.669176
1.892030616	1.999422961	0.356139149	2.012868112	0.343245923	9.9	7.23728
1.314965192	1.925389969	0.543026806	4.479697389	1.031578916	9.85	17.855122
2.45483636	2.229031295	1.300936836	4.335545327	0.924485025	9.75	10.561601
1.26513948	1.628430124	0.920353303	5.264047038	1.165126687	9.65	20.274811
1.988852577	2.141766916	0.753903824	3.817752215	0.756369251	9.7	11.818161
2.809183332	2.559401913	1.378739734	4.187717821	0.975675975	9.9	7.930527
2.621988398	2.19977059	1.366866713	3.659017727	0.731582352	9.2	8.655601
2.562662519	2.481611912	1.080818092	3.960561574	0.730206813	9	7.401551
1.523634121	1.873111876	0.02741775	1.754071818	0.248414109	9.8	12.29409
0.642109517	0.998149522	0.030509366	2.409715132	0.324767536	9.8	13.093429
2.080222433	1.741667048	0.887485006	2.644898483	0.431220877	9.75	8.877367
0.318252695	1.129617489	-0.549504115	1.852164227	0.287827663	11.7	11.883983
1.782654045	2.032853997	0.57915072	3.740722991	0.73349408	10.15	10.949806
0.750968739	1.381533853	-0.133200313	2.562861227	0.523152243	11.65	14.958475
0.834292098	1.259861652	-0.026876232	2.354897783	0.279771829	9.25	17.485055
1.209777866	1.700347272	0.274178089	3.891823628	0.446284486	7.75	9.227697
1.646077818	1.837117591	0.827247271	4.897130744	0.917606723	10	17.586356
0.649215138	1.436039013	-0.605033739	1.02218596	0.088360269	9.8	13.652064
1.572484578	1.647751093	0.722724471	3.564538554	0.74796061	10.5	11.809947
0.866649793	1.500211362	0.248503471	4.152565916	0.818450043	10.25	15.045744
2.564806066	2.430008556	1.008025369	3.357255214	0.574172135	8.75	6.693018
0.207599918	1.303536955	-0.155957861	4.440021593	0.900400114	10.5	15.401665
1.476884189	1.798720359	0.172091854	2.656520752	0.162980824	7.8	10.695185
1.255567704	1.546517452	0.88943229	4.955859642	1.202978479	11.5	20.877823
2.159455985	2.244598686	0.662989934	2.996664328	0.491495774	8.9	7.09765
1.424941229	1.735870679	0.295144346	2.854029165	0.3661841	8.5	7.732831
1.874597161	1.951667072	0.692603269	3.216036205	0.529485875	8.75	9.665639
1.97718009	1.942148736	0.921545292	3.660288318	0.719428589	9.4	11.445471
2.461007114	2.446666292	0.79651416	3.215913734	0.591126198	9.55	8.874515
1.728852596	2.081993916	-0.032113168	1.499823198	0.305885045	11	8.680584
1.51938655	1.931803027	0.378522541	3.551945819	0.776888304	11	10.823864
1.952968658	2.161077528	0.424144499	2.391409879	0.409932583	9.1	7.087154
2.186846057	2.184003569	1.097631831	4.74009122	0.844978352	8.9	6.45414
1.607510058	1.810736658	0.803846305	4.533673375	0.912289697	10.05	9.244695
1.231740012	1.52223779	0.890283145	5.367040082	1.085582045	9.85	18.038215
1.657661716	1.879761097	0.16907033	1.98007232	0.187253599	9	6.91159
1.197962379	1.667142607	0.188565816	3.312817811	0.722998523	12.1	16.285991
1.638421583	1.961062153	0.417524571	3.623229555	0.632692234	10	7.897102
2.006536258	2.097857733	0.747442376	3.745032758	0.669317867	9.5	11.532968
1.948798858	2.012701794	0.924705287	3.879621505	0.710461684	8.5	10.58031
2.150142997	2.209656754	0.866522351	4.618623641	0.717461079	9.25	9.775268
2.438435389	2.421254876	1.158339947	4.62671318	0.775964206	8.3	6.802418
1.130643016	1.471769336	0.070511685	2.349855512	0.366950933	10.5	12.436573
1.138824196	1.589300863	-0.057090398	2.010153335	0.385529176	11.05	8.037303
2.249862873	2.25049705	0.665388292	2.5390107	0.304781934	8.15	10.087839
2.286977177	2.190325809	0.879836308	3.636088428	0.606270223	9.5	7.229523
1.34809698	1.519288349	0.323606278	2.741589349	0.248837643	8.15	10.076659
1.943634902	2.113352724	0.82389994	4.413103013	0.770137691	9.05	10.588523
1.955664338	2.166493791	0.392315512	2.332325659	0.227171621	7.95	7.317134
1.09577571	1.678651667	-0.09283216	2.573443697	0.17564422	7.75	7.752452
1.739682926	1.886217921	0.749322037	4.102271957	0.792485844	10	8.611909
1.194090164	1.556688909	0.287714195	3.352852896	0.686094418	11.7	12.415012
1.16667167	1.937768496	-0.217871295	2.594085818	0.494389408	10.5	11.626625
0.906446106	1.484795444	-0.184115128	1.808835757	0.254080654	9.25	14.799224
2.286644367	2.190747763	1.021023989	3.900788701	0.777067991	9.75	8.63963
1.470989499	1.865287737	0.609225016	4.144818424	1.010632512	11.25	13.896303
0.749773274	1.522605993	-0.233943918	2.804882285	0.474324181	10.25	16.951631
0.63474909	1.328470007	-0.086528035	2.926920969	0.559751464	10.3	14.002737
2.158028045	2.054041874	1.093308362	4.63040785	0.896988886	10.2	9.553844
1.264808705	1.620096047	0.421541092	4.010284012	0.649406581	9.55	13.261236
1.026962569	1.863172265	-0.316465902	2.345403902	0.369253581	9.5	13.041638
0.483857328	1.631240067	-0.684038171	2.357032165	0.409963771	10.45	11.733401
1.214809051	1.747128409	-0.109508173	2.020357496	0.326445723	10	9.551334
1.492160735	1.621799492	0.219864881	1.82893354	0.074467322	8	8.905201
2.724658834	2.470438398	1.194785657	3.516872509	0.68193613	9.1	6.657312
0.48665924	1.448840044	-0.540112632	1.745030588	0.464697316	12.25	16.461099
0.90111814	1.422460968	-0.199090799	1.584081976	0.142975833	8.7	7.377595
0.575026536	0.744978733	0.279825486	2.86123621	0.465851514	11.65	13.017453
1.483346799	1.811104908	0.73336839	4.749953887	0.890171776	9.25	15.486424
0.936960217	1.113035206	0.077712958	1.804596409	0.148725769	9.25	9.052589
1.559630527	1.869838133	0.207931229	2.237100914	0.491556501	10.85	10.835158
1.566451285	1.764436715	0.428111833	3.001952407	0.492814086	9.6	10.011293
1.191913877	1.881748744	0.21374439	3.572928079	0.688593178	8.9	12.012662
2.5851684	2.319796811	1.135755451	3.335402726	0.651412438	9.25	9.159251
2.66292822	2.331839177	1.196039815	3.395029791	0.644842638	9.25	6.580196
1.245569589	1.500143118	0.909914926	4.696492348	1.118939874	10.5	15.53023
1.768819409	2.195151433	0.123132667	2.029131788	0.486888333	10.55	8.390029
1.930353713	1.954197117	0.909622755	3.984322541	0.914907347	10.95	11.235112
2.307443859	2.182050743	0.863297494	2.918479244	0.500830963	9	6.451973
1.994804746	2.178169612	0.72136157	3.22220439	0.838481662	10.5	10.630047
2.696930155	2.613924892	1.113699492	3.629746397	0.547624997	7.8	9.775268
1.94688415	2.134690091	0.71725982	3.627388674	0.840250542	10.5	7.842459
2.746973693	2.553699091	1.224157399	3.798177292	0.552593031	7.75	9.093543
1.21227932	1.698685563	0.399704807	4.363927754	0.830578165	10.45	16.724503
1.037540728	1.415893448	0.650886439	4.75827414	1.018940846	11	15.174423
1.862466968	1.950547542	0.947834757	4.473444083	1.043349543	11.25	9.260438
1.472408077	1.351657539	0.259669759	1.042609619	0.047568861	9.75	7.768537
1.578598475	1.975133627	0.43062639	3.525952261	0.74340793	10.25	10.668491
0.760095838	1.473700103	-0.024935113	3.559531737	0.43776556	8	15.068104
1.9549176	2.070458199	0.550180129	2.802678762	0.495882459	9.5	6.393908
0.913062927	1.689421469	-0.001841239	3.843371937	0.702879034	10.25	11.79352
1.037571495	1.44769788	-0.103183595	1.660743537	0.199081653	9.8	9.389801
1.242639703	1.815660197	0.048518228	3.09920633	0.311520808	8	8.910107
1.888302211	1.944331812	1.021491192	4.453434995	1.063378953	11	10.832078
1.256630631	1.673660839	0.127471054	2.747593463	0.414113398	9.55	12.248117
1.835197784	1.866908932	0.903378149	3.905392716	0.62894193	8.1	17.940109
1.73619412	1.804939818	0.620929428	3.349960408	0.617983932	10.3	9.356833
2.386585145	2.502541061	0.593316077	2.211574378	0.401289857	8.75	6.24903
2.299012032	2.365922604	0.926067632	4.059156606	0.628844691	8.25	6.189253
2.09217999	2.152796568	1.014612286	4.257974681	0.901345418	9.5	11.084531
1.454222601	1.796016582	0.344611923	3.215664009	0.562721154	9.75	7.193931
2.141703588	2.151527758	0.80161917	3.72980265	0.370185683	7.5	6.72861
2.449414796	2.287231376	1.166406833	4.116269799	0.768725555	9.1	9.562286
1.062659891	1.245811552	0.847055926	4.598357189	0.904743439	9.15	16.138033
1.147931433	1.735392681	0.575644206	5.167016013	1.068000006	10	17.643851
2.565179487	2.330796324	1.265753198	4.277063339	0.861540148	9.65	9.808008
1.198213104	1.603980824	0.430303732	3.697799931	0.781853714	10.45	14.72804
1.565523466	1.846679586	0.576400261	4.088021176	0.717958888	9.6	8.834017
1.857739403	1.92146636	0.632628991	3.196687765	0.430817745	8.5	6.552931
2.142517477	2.236992326	0.885736069	3.793667	0.735861991	9	7.921857
1.945090026	2.163974698	0.673904178	3.780041868	0.669302331	9.1	11.338923
2.310870527	2.240239131	0.896975486	3.603527833	0.674939874	9.75	8.48072
1.795099154	1.875712419	0.70340113	3.718016825	0.606961207	9.25	8.368012
2.14298898	2.283920891	0.508253725	2.406069822	0.45866764	9.45	7.81508
1.057758011	0.990231543	0.521978425	2.340053887	0.364948059	9.35	9.824549
1.753035031	1.95645736	0.632427101	3.895814394	0.645667845	9.2	7.940908
1.453239676	1.767935248	0.707352682	4.242545489	0.7210499	8	13.884782
0.913703867	1.125150712	0.193818413	2.604315253	0.442742721	11.95	16.757357
1.914480258	2.109057418	0.717090585	3.77260401	0.677059228	8.95	13.868469
1.796467548	2.076312344	0.627869376	3.896631545	0.711725856	9.25	6.706251
2.300428851	2.316556829	0.743224911	2.94711702	0.540687295	9.25	6.292721
2.083523119	2.109737866	0.737782576	3.282988568	0.563060698	9.25	10.361738
2.190278233	2.246900877	0.868798826	3.786286377	0.737718806	9.45	9.068902
1.849307691	1.834913864	0.714470095	3.324683505	0.585163399	9.85	8.22302
2.183733825	2.304574289	1.013873195	4.240172998	0.765190283	8.15	7.073009
1.911142917	2.057780721	1.080805702	5.470229102	1.08837055	9.75	14.610426
2.44473958	2.254185416	0.942570966	3.683093569	0.65643027	10.25	8.154574
1.061310685	1.799304259	-0.116151904	3.099206111	0.421466194	8.95	6.909308
1.354081687	1.829414054	0.184904125	3.12038832	0.412538811	8.55	6.126169
2.584740045	2.349448682	1.334530174	4.390438394	0.774555333	8.5	7.448665
1.961314174	1.859849991	0.819816128	2.638577125	0.494840796	8.8	11.409765
0.633411841	1.102869739	0.078865526	3.749665973	0.473787128	9.75	15.944216
1.350376575	1.985935968	0.040523885	3.094184307	0.567247201	10	9.342801
2.26928464	1.99049147	1.027465822	3.779583803	0.543960348	9.1	7.784964
2.406957235	2.24946776	1.010554227	3.504841936	0.811092044	10.75	8.151836
2.025281327	2.172651442	0.648532339	3.638309417	0.350312533	7.5	9.816335
1.59668555	1.935821285	0.459937736	3.860086094	0.648036824	9.55	6.076317
1.036347499	1.54610605	0.503866026	4.54297595	1.036215006	11.5	14.467944
0.375502817	1.037165402	-0.435404819	1.696284507	0.18227778	10.25	6.635523
1.890192632	2.140647379	0.585433303	4.003037223	0.633826989	9.25	8.478211
1.5504979	1.688189564	0.953402812	4.851851628	0.976999953	9.75	13.868811
2.197677148	2.072616434	1.173349644	4.607908963	0.902891203	9.7	9.526579
0.807380302	1.520212763	-0.104864561	3.138283326	0.505225911	9.75	13.157084
2.143282062	2.182762163	0.861475394	3.401629301	0.813608237	10.3	9.756103
1.542127648	1.891307175	0.559629742	4.880263943	0.780987255	9.75	13.666324
2.000119489	2.187613606	0.372299058	2.239275567	0.3034607	8.85	8.053159
1.785356238	2.032390376	0.465934935	3.342977135	0.298961063	7.583333333	5.822267
1.825662454	2.144517776	0.508704215	3.762982127	0.704554278	9.95	7.453684
1.496030689	1.725520831	0.400339287	2.316817594	0.508711524	9.7	11.780173
2.321546884	2.30531355	0.963303814	3.588577571	0.649349014	8.65	8.09765
2.684513	2.463685948	1.342321305	4.381943896	0.922499974	9.5	9.044832
2.016696491	1.946463262	1.143806123	4.040240725	1.12655687	11.8	10.990873
1.384457477	1.781814236	0.693213908	4.802132528	0.950064592	9.55	16.42334
1.470228539	1.886897238	0.058799922	2.17724497	0.214020171	8.5	7.993041
0.917435201	1.069625947	0.134759491	1.989283018	0.267475465	10.75	11.081907
1.814211152	1.882711801	0.947565275	4.917115593	1.010880749	11.1	11.763404
1.192715036	1.723991736	-0.023044887	2.522123085	0.382009002	9.65	6.76135
2.187795883	2.185367457	0.870801483	3.589759691	0.662090756	9.25	9.846338
1.623885926	1.608781232	0.664706911	3.304378277	0.581383419	10.25	10.46783
2.244872636	2.30288552	1.172507913	4.268841047	0.800987762	8.25	6.515058
0.24060225	1.309507881	-0.756775138	1.813467301	0.29645904	10.9	12.25576
1.887362853	2.055064005	0.758367061	3.813390663	0.770815849	9.6	6.093429
0.761169687	1.101027356	-0.054286502	1.958439763	0.291917544	11.25	16.044946
1.428306759	1.924754748	0.236192828	3.345926046	0.602558282	9.75	11.880789
1.130315396	1.48768525	0.05232299	2.1784651	0.462377561	12	16.496691
0.821868109	1.355913167	-0.217320375	1.963232431	0.26646134	10.35	14.353524
1.14488322	1.585407871	0.116819455	2.777147465	0.597202582	11.75	12.094341
1.305261392	1.715975047	0.017395198	1.891624902	0.423290315	11.1	11.943759
1.698029063	1.890285662	0.562446284	3.837215904	0.674547165	10.25	10.49806
1.736043168	1.907334186	0.835314342	4.808634786	0.852548146	9.5	13.296714
1.013393575	1.655877727	-0.101105652	2.461799333	0.48287743	10.4	10.274013
1.641677498	1.952867943	0.068593434	1.714563531	0.436932286	12	12.466575
1.741318591	1.963941475	0.11933194	1.405830471	0.206697272	9.75	10.629477
2.042544596	2.156179619	0.740638638	3.779884303	0.746742783	10.1	10.23785
1.275764788	1.55921675	0.044988741	1.586156749	0.288803598	10.75	14.583504
1.879006626	1.855979518	1.005317232	4.546623717	0.696640738	8.25	11.324891
1.26264854	1.835638434	0.639826772	5.12766308	1.178565579	10.75	15.46783
-0.130737889	0.781765309	-0.710908612	1.755692104	0.032591411	7.35	12.537759
2.270663854	2.164418734	1.027892764	4.544268154	0.82986758	10.25	9.120921
1.733478077	2.025280559	0.059935865	1.583092962	0.188154493	9.5	8.724503
1.635396862	2.013385446	0.425868325	3.632499072	0.641233834	9.5	8.513575
2.096975713	2.044877885	1.135187972	4.829876051	0.944889213	9.75	9.096167
1.920177336	2.157828877	0.735008673	3.923682478	0.63328744	8.2	9.165297
1.970147432	2.094489765	0.64118344	3.340819033	0.623971876	9.75	11.127766
1.017195962	1.637095483	-0.237883297	2.077593913	0.291549684	10	8.436915
1.786862503	2.059019175	0.503669867	3.384208579	0.657783646	9.95	7.314054
1.901857636	2.048103874	0.707759443	3.50570539	0.715586725	9.75	12.23112
1.708435863	1.605587126	0.287598139	1.57041742	0.320614421	12.08333333	19.062057
1.107868074	1.208149242	0.553516167	3.838157257	0.642241727	10.95	11.825918
2.471484917	2.488191621	1.222288893	4.801834333	0.72869142	7.5	9.575404
2.461447315	2.262215602	1.089973609	3.818722585	0.701881163	9.45	6.243896
2.189487371	2.314609688	0.763869555	3.614908262	0.790843109	10.25	9.441364
1.155750648	1.379621939	0.502568145	3.209620254	0.653489623	10.15	15.182523
2.101273775	2.149064056	0.713421976	2.804169722	0.528082214	9	9.337211
1.226424965	1.665071276	0.236716883	3.185678204	0.562831095	9.75	11.02099
2.087166743	2.172692967	0.967202915	4.384913769	0.986760045	10.5	13.750741
1.585064251	1.841872407	0.69529979	4.562167134	0.922159222	10.8	14.093315
1.705784514	2.132947589	0.639419707	4.713843601	0.894302559	9.5	17.743098
2.219413866	2.247492023	0.883466632	3.819559255	0.827226158	10.35	8.885922
1.137400704	1.605229963	-0.103063112	1.412871852	0.229209093	9.45	8.187885
1.558552393	1.888801455	0.274220732	2.96656198	0.524377013	10.25	8.028519
-0.099140698	0.882141091	-0.767159283	1.504544283	0.142871123	9.5	8.466689
1.863937208	2.040808073	0.934759317	4.867941982	0.918993202	9.25	6.4214
1.449994538	1.34251441	0.666358605	2.981523969	0.4853041	10	12.053159
1.779048772	1.929434411	0.693932161	3.550504763	0.600616234	8.7	7.93817
2.773302752	2.484839403	1.235384772	4.051212951	0.64111779	8.75	8.044946
1.834490445	2.162190396	0.409271123	3.078022907	0.556495571	9.45	7.730207
2.608855354	2.460759886	1.156132393	3.98807162	0.741094179	9	7.888888
1.945656125	2.248929297	0.830681373	4.468711976	0.952306367	9.5	11.45414
1.891439943	2.022934142	0.633902009	3.223895094	0.574446394	9.25	7.749828
1.944663498	1.816079289	0.889781283	3.64820843	0.564189152	9	6.484827
1.926894702	2.038256229	0.785541199	3.973361196	0.73768202	9.55	8.581679
1.192764677	1.873174923	-0.049006052	3.022014084	0.454590528	9.25	7.235455
1.326881118	1.2659218	0.362940953	2.181138176	0.239006966	10.1	13.43623
1.55206699	1.900155919	0.710369032	4.876576175	0.879097491	9.25	12.16313
1.178247387	1.579103976	-0.057741967	1.880308445	0.331629219	11	14.405544
0.917177295	1.560963847	0.01300931	3.504645191	0.609219304	10.5	12.188227
1.192575978	1.400781923	0.033937775	1.752891465	0.051254887	8.6	9.209103
1.778268548	1.981600355	0.835461407	4.263990412	0.677203737	7.85	11.648528
1.304571096	1.524133068	0.431222309	4.029678542	0.597064509	10.4	19.790326
2.580199638	2.408632667	1.198990818	3.929896451	0.800087905	9.25	8.148984
0.13612712	0.825470833	-0.485497558	1.301126228	0.04148939	8.916666667	13.049965
1.871039851	2.0669215	0.62713901	3.444010327	0.704363369	9.95	7.366529
2.066501632	2.155053943	0.725471468	3.367490191	0.66271384	9.7	10.741843
-0.128941098	0.672478051	-0.625165911	1.599037116	0.090266069	8.375	9.285763
1.415934694	1.818118392	0.477186502	4.630154229	0.866146357	11	12.41467
1.63660893	1.975089862	0.580349062	4.080332408	0.780166274	9.7	10.917522
1.458941754	1.798764965	0.420022769	3.203742288	0.683571108	10.25	17.023043
1.424926872	1.614003602	0.223934815	2.030585474	0.180160922	8.4	8.743668
0.22584013	1.080433142	0.018455904	4.896555288	0.852889168	10.75	21.189368
2.285545132	2.167982841	1.074623397	3.491746396	0.87022564	10.3	12.527378
2.61621807	2.33009752	1.403707428	4.664337239	0.830826982	8.75	6.00308
2.209646265	2.237470113	1.110246719	4.583523735	0.945096741	9.4	10.016769
1.494536188	2.023461706	0.229637295	3.342486017	0.621809272	9.75	9.586356
1.582985245	1.739988511	0.995698257	5.058621964	1.035106221	9.75	15.319872
1.667742554	1.937896623	0.277090033	2.397134496	0.283348498	8.55	7.437485
1.572930561	1.936695933	-0.086498879	1.349480861	0.28179396	11.5	10.177846
2.394985385	2.4183648	0.92493514	3.568045419	0.68597082	9	8.448094
1.97532719	2.032122269	0.580299143	2.57870135	0.565716186	10.4	12.992813
1.689773247	2.028135249	0.370015327	3.326867031	0.522549664	9.3	7.01289
1.46416253	1.829782317	0.637742565	4.577248632	0.819373925	9.15	11.615103
0.674167229	1.614770819	0.037328004	4.856704249	0.909458814	10.25	15.993497
1.256385573	1.825475341	0.43043793	4.390250604	0.986250345	11	10.254848
1.881120513	2.062508286	0.750654115	3.861333365	0.776117249	9.6	11.752566
1.549372818	1.754694439	0.106522676	1.325689033	0.19325511	9.75	9.748459
1.627595041	1.88716827	0.647485013	3.846426193	0.702338601	9	7.401551
0.421330541	0.815338777	-0.360287121	1.446419722	0.067471589	9.75	10.419233
1.276617408	1.834408783	-0.036706239	2.508425501	0.273172062	8.55	7.721879
2.379362057	2.090237311	1.250503279	4.333461618	0.846826386	10	6.515058
0.987353856	1.424960288	0.058096842	2.687003644	0.380607863	9.5	12.475359
1.968089101	2.262222214	0.669937221	3.807613451	0.685663701	8.75	8.319415
1.526641464	1.386177137	0.819992464	4.123381762	0.603560893	10	13.909879
1.592233662	1.770890432	0.530466112	3.378151175	0.612072036	10	7.434291
1.71553783	2.001814016	0.410893546	2.839060436	0.555398676	9.7	7.965662
1.881427117	2.039261982	0.588657351	3.395389549	0.684574463	10.5	6.706137
2.148441815	2.172892399	0.787215654	3.491405787	0.719526858	10.25	7.50057
3.030882548	2.767234728	1.231130525	2.678976692	0.673373322	9.1	8.455624
0.876361893	1.327441695	0.390387849	4.243511617	0.751753894	9.75	12.448094
0.864236018	1.454351202	0.140578239	3.992931826	0.703556756	10.75	17.324321
1.879243412	2.015842849	0.833318049	4.025242054	0.833678858	9.75	12.031371
1.842689488	1.955170381	0.96804334	4.517982691	0.968364673	9.95	11.818275
0.018230182	0.918363588	-0.501473559	2.445862735	0.334719967	9.75	21.509696
1.942262734	1.943869894	1.0526704	4.318779195	0.966591464	10.2	13.742527
1.059347669	1.472672755	0.810274734	5.079585817	1.216358646	11.05	17.241843
2.30490091	2.228807877	0.949070343	3.705401642	0.598682906	8.75	7.571868
1.103571724	1.34950277	0.038488967	1.558299709	0.240188534	10.45	11.960073
0.929530759	1.346950911	-0.143093188	1.675236993	0.230312279	10.45	12.420031
1.729693501	1.964412659	0.676473042	3.95938715	0.793574752	9.9	11.582249
0.847225077	1.737695484	-0.416919152	2.335195145	0.498941031	11.5	16.269906
1.965816955	2.314483625	0.432909975	2.843403517	0.496738318	8.75	6.107118
1.079817106	1.685549479	-0.018764547	2.632318415	0.507481548	10.15	12.141227
0.256903856	1.156772469	-0.597439265	2.250587412	0.065186437	7.5	8.070157
2.309658793	2.242816349	1.098478547	3.84565309	0.92536536	10.15	7.806867
1.912894797	1.979784384	0.908045737	4.769173496	0.804582161	9.4	13.131873
1.671883979	1.938155571	0.909623642	5.319370506	1.044907019	9.75	17.668491
2.100109695	2.228589297	0.643809288	3.327064562	0.592283592	9.5	8.510495
2.006641052	2.12409843	0.743631783	3.796434552	0.60575959	8.8	7.817704
1.558367973	1.698494307	0.344752243	2.448284727	0.374963719	9.8	8.880561
1.36488956	1.315848382	0.456655149	2.541350494	0.367661099	10.5	11.83185
0.203755583	0.811664832	-0.309361707	2.043005629	0.254065536	10	13.326716
2.016695433	2.0590999	1.005581738	4.577054518	0.935140494	10	9.603353
1.65883245	1.94279629	0.414085148	3.03426075	0.538847603	9.5	10.394022
1.606219432	1.716692378	0.1991677	1.396380067	0.049710134	8.3	6.720282
1.740793664	1.668460237	0.656698496	2.858726297	0.364013138	8.6	6.65697
2.425786946	2.304040315	0.986544385	3.642557678	0.567466293	8.65	7.278918
1.128004428	1.616884152	-0.143908947	2.18908269	0.052500423	7.75	15.357859
1.529458527	1.563457036	0.646485832	3.393315198	0.532905721	9.25	13.548596
1.116451398	1.020674459	0.584983653	2.532926492	0.394562431	9.4	11.081793
1.584491998	1.849337728	0.217902496	1.777304504	0.5197134	11.65	13.753935
1.619440497	2.039729059	0.435033792	3.469863889	0.778688085	10.35	10.72861
1.974541331	2.070262568	0.449518634	2.298585233	0.304869909	8.9	6.597193
1.583093885	1.417183674	0.704026019	3.067371022	0.60803912	12.35	15.497604
1.96836904	1.944819285	1.067782594	4.502969204	0.849784663	9.15	12.541067
1.619911502	1.818361166	0.386830003	2.683856809	0.388024207	9	10.002509
1.316889371	1.694826045	0.548190632	4.251238917	0.886612954	10.65	14.564339
1.249141287	1.835150816	-0.10640024	2.48916659	0.218102109	8.875	12.675108
0.914968226	1.129121134	0.129437766	1.744761168	0.333302187	9	11.61556
1.821026703	1.961291491	0.832480744	4.466580889	0.701703671	8.5	8.619895
1.901016725	1.939591788	0.836373798	3.753299337	0.748671008	9.8	10.827173
1.293996	1.627317082	0.268003699	2.523060671	0.487129279	9.7	19.01597
0.992165415	1.503482261	0.466493797	4.017335456	0.895037468	10	18.202943
2.190067354	2.249024409	0.915773447	4.000244697	0.606618275	8.1	6.834816
1.314184072	1.838001884	0.191330152	3.488628219	0.614419181	10	17.463837
1.871202283	2.06518327	0.644262086	3.608490527	0.698669823	9.75	10.281656
1.882106655	1.977581712	0.562748707	2.787761932	0.611474621	10.65	8.584759
1.117926883	1.654336794	0.283399879	3.796627395	0.769579454	10.5	15.895049
1.598848019	1.928293595	0.274649513	2.943656964	0.503008832	10.05	15.155258
1.322958981	1.438057814	0.50398565	3.110028898	0.521894851	9.75	9.472051
1.903831625	2.126143656	0.768463408	4.110690673	0.900618394	10.25	8.866187
1.964750821	1.927637705	0.772573539	3.633017737	0.526350666	9	6.939425
0.51451794	0.920220094	-0.094339742	1.828751942	0.195294905	8.7	6.69838
1.652516189	1.922377462	0.398113398	2.980928572	0.447855994	8.9	9.91775
2.81434582	2.550120666	1.149618054	3.039039645	0.608756314	9	8.633584
1.807357993	1.863920339	0.584974644	2.912753664	0.548451737	10.1	6.468058
2.565312319	2.457043721	1.132653267	3.987729864	0.779490184	9.15	6.315195
1.706914757	1.885833226	0.45196799	2.601051166	0.443751984	9.5	10.561715
2.203287615	2.148166542	0.999315736	4.271000141	0.729274496	9.15	12.765571
1.698728718	1.956695318	0.890814172	4.702098579	1.016539568	9.75	14.58031
2.581563878	2.427561574	1.273378146	4.147555867	0.986337173	10	8.890942
1.956479933	2.01584951	0.994620757	4.587590182	0.968510203	10.25	11.280971
1.23055659	1.48303047	0.542480501	4.703581373	0.732067922	10.25	16.119438
2.005222494	2.02629901	1.078667625	4.797533039	1.004310364	10.15	12.743668
2.005928159	2.117831465	0.629627743	2.952754217	0.558676568	9.4	9.137348
1.397376257	1.514797188	0.292669925	2.180161393	0.228110873	8.8	9.838809
0.937601949	1.494060967	0.081112376	3.243845184	0.671567408	11.7	15.180355
2.152976661	1.973998676	1.163933533	4.410664117	0.846288248	9.7	9.146132
1.65140522	1.953944762	0.745728671	4.583160396	0.936204918	9.95	14.29603
1.344052298	1.675607414	0.15378719	2.459559245	0.303572745	9	9.301619
1.513986759	1.945116688	-0.200776148	1.283757647	0.26286515	11.55	9.282454
1.405638804	1.552812308	0.799925181	4.540830995	0.918124837	10.75	10.758156
1.856878398	2.061135487	0.647604599	3.154614802	0.696166008	9.6	8.474903
-0.044425385	0.87155294	-0.723630627	1.501792384	0.199150259	11.35	11.664955
2.008774424	2.087338662	0.912550142	3.878582863	0.866053403	9.9	14.744581
1.207127651	1.568637521	-0.047744975	1.85777433	0.266136632	10.5	8.847592
0.972533899	1.673696445	-0.057474131	3.267866655	0.646437421	11.2	8.096851
2.176786852	2.333824743	0.627548456	4.1722448	0.363279558	7.85	7.615103
0.604390249	1.40065758	-0.342916737	2.585039748	0.340218136	9.5	7.662217
2.488958784	2.448931282	0.93804074	3.252025292	0.521104057	8.25	11.187999
2.065583764	2.046376538	1.025477792	4.094256773	0.823294557	9.35	12.869609
1.44285548	1.881561042	0.234435836	2.778259744	0.436072113	8.7	12.373602
1.411393531	1.072730329	0.657886842	2.204025746	0.276164419	10.3	16.704768
1.907402697	2.177735265	0.614057554	3.74495141	0.616381109	8.75	8.086584
1.873887162	1.918845706	0.905695746	4.124696579	0.914850643	10.75	11.834131
0.560115034	1.408172192	-0.672103408	1.34808848	0.115278819	10.375	7.64522
2.060473249	2.029337592	1.099097353	4.689758565	0.956747061	10	6.591147
1.350559347	1.517128928	0.381924494	3.248500369	0.449207925	9.8	10.509012
1.456635507	1.588112745	0.460555499	2.73926011	0.539337063	10.45	8.825119
2.349286677	2.379870926	0.723817614	2.440116149	0.653485761	10.25	11.796372
0.640742934	1.320098889	0.641495743	5.384539722	1.231634197	9.75	20.820328
1.647134174	1.70283498	1.129861553	5.292655191	1.153789245	10.75	12.272758
1.36690165	1.719587355	0.18967402	2.679160699	0.330733952	8.75	10.832762
1.714291366	1.879826512	0.935440769	5.081248089	0.897052707	9	16.121606
2.323233106	2.167041089	1.270232474	4.192893597	0.708168998	7.75	6.846338
0.88415276	1.293459368	0.210106032	2.987614904	0.531995542	9.75	10.522815
1.872302931	2.103269168	0.61138626	3.537587569	0.614190274	9	9.452201
1.24608772	1.805059312	0.076334232	3.075764889	0.357493445	8.25	10.569244
1.513051957	1.733881694	0.352027653	3.145262134	0.451112934	9.7	7.563084
1.586804686	1.779069434	0.512004971	3.230976848	0.681177966	10.9	10.052247
2.358808261	2.126387699	1.279986757	4.302465017	0.791575074	8.8	12.20146
1.629194094	1.796689893	0.780392019	4.404234801	0.871700939	10.25	12.899269
2.584557701	2.475885911	1.300107403	4.459520771	0.741525466	7.85	7.21013
1.585048416	1.79403423	0.858536472	4.844967466	1.00002788	10.35	14.886835
1.361138434	2.049614808	0.208257693	3.930785407	0.844069063	10.6	12.71629
0.136004832	0.85268343	-0.53189908	1.482576043	0.16314475	10.6	11.177503
2.834967289	2.532363787	1.254047797	3.601418902	0.601482754	8.5	11.201688
2.225767226	2.196448989	0.926826057	4.085358944	0.639974016	8.85	7.697923
1.480647736	1.632848091	0.347380413	2.247587414	0.36769406	9.5	10.610426
1.147303046	1.680318698	0.340013913	4.091813473	0.714215431	9.25	15.251083
1.701634317	1.871227836	0.401300794	2.291998542	0.539905502	10.8	11.114647
2.079218358	1.944479364	1.051565191	3.776919072	0.810262084	10	7.774469
2.026259609	2.033884574	1.177599866	4.812920006	1.123470352	10.5	15.328199
2.154792041	2.179760705	0.740039277	2.904277681	0.645549606	10	13.942276
1.845633	1.852696056	0.661667521	3.638491304	0.493849961	9.25	6.649212
1.658553608	1.932302362	0.730464225	4.051020478	0.810644106	9.15	8.354323
1.817884865	2.058473631	0.583278983	3.640878591	0.445423956	7.8	10.925849
1.56828873	2.020379173	0.138153883	2.500479666	0.27929258	8.25	10.479466
2.309378407	2.245264451	0.929170744	3.674929653	0.71331294	9.75	6.429614
1.314861769	1.727787978	0.208406841	2.904910138	0.495661191	9.65	12.176363
1.90409641	2.104081964	0.772485039	3.872667742	0.713525928	8.75	9.069016
1.150832634	1.416449519	0.286912828	3.10696418	0.492466555	10.25	8.111225
2.257690514	2.33661893	0.784841523	3.559081754	0.610293979	9	8.124344
1.988417539	2.1684065	0.676829594	3.649647868	0.523084275	8.25	7.502966
1.406904312	2.040265834	0.201873552	3.258266649	0.856361456	11.4	10.654688
2.086715097	2.22798547	0.491169877	2.241645643	0.458613026	9.55	9.086014
2.46277386	2.347047845	1.268520254	4.288395834	0.728860758	7.85	11.946954
1.366267542	1.557108808	0.496810927	3.377315279	0.479895871	8.6	10.268651
1.943248681	2.255730188	0.635042864	3.840558049	0.442863401	7.25	12.590006
0.80151756	1.383348213	0.30725893	4.540223556	0.850101232	10.55	15.421172
1.688384587	1.881545845	0.411188406	2.897274711	0.264899679	7.85	9.600616
1.77702183	1.919889948	0.605029582	3.726299471	0.566674485	9.25	6.980492
1.030930028	1.771558291	0.36597161	5.201641635	1.031478674	10.25	16.946269
1.648236599	2.128683137	0.194475406	2.783981393	0.502986163	9.5	7.881131
1.471628755	1.636780071	0.576595911	3.949924835	0.647562128	9.95	10.936573
1.55066454	1.988027922	0.168685967	2.724363613	0.476883842	9.8	10.008441
1.295092252	1.29416983	0.129678527	1.416948186	0.098589574	9.75	9.586356
2.219364768	2.282764666	0.979491581	4.337353012	0.638362444	7.9	6.927789
1.089788593	1.112775464	0.604125938	3.832018021	0.551907044	9.75	11.629363
1.484763654	2.098266979	0.180106906	3.374106153	0.651801055	9.75	14.878736
0.923790228	1.005080753	0.35161736	2.2536264	0.340855596	9.3	16.379534
1.813670117	1.834655159	1.031847973	4.500483599	0.831822914	8.8	15.029545
1.056453769	1.865408035	-0.377820059	2.330441561	0.305062559	9.75	11.489162
1.604653449	1.897802896	0.607338629	4.016720193	0.735609554	9.4	7.738877
1.981892582	2.330200006	0.660288738	3.730001584	0.731890828	8.85	20.910107
0.732429019	1.198005674	0.584062169	4.906668095	1.0243308	10.7	18.654688
0.336239366	0.854625412	-0.017980609	3.24817114	0.50366271	11.25	21.000912
0.046558749	0.937088266	-0.599975176	1.659819753	0.060360481	7.25	13.260552
2.24100363	2.419898785	0.791403954	3.863389377	0.573881218	8.1	7.259867
2.190289014	2.293012611	0.581077421	2.911104141	0.528830161	9.75	7.100844
1.361478669	1.783429694	0.680343028	5.106547195	0.90350277	8.95	15.398699
1.086785233	0.859507697	0.478018393	1.972653286	0.224643777	10.5	14.640543
1.198216078	1.698336345	0.306383166	4.094350993	0.713428798	10	11.97091
1.475028695	1.699979011	0.803947236	4.461924509	1.027856753	11.15	14.418777
1.833934714	1.917528419	0.679326863	3.832809584	0.657833458	10	10.788272
1.555574013	1.620913892	0.64393578	4.087544057	0.640542388	10.25	10.35341
2.379599386	2.446205633	0.976194706	4.265528473	0.704746089	8.5	6.011407
1.437718297	1.759650047	0.537913165	3.868554249	0.847046333	11	12.508213
2.046463394	1.920416944	1.077552277	4.447154491	0.915672862	10.75	9.572781
1.963116082	2.148599389	1.019473023	4.987401995	0.965918178	8.95	12.267282
2.200070429	2.325136299	0.713882031	3.088117888	0.593196936	9.05	10.706251
0.755081539	0.937641402	0.125245748	2.123641473	0.268045844	10.25	13.436344
1.941823179	2.097519689	0.430889972	2.882391702	0.21332791	8.05	10.156399
1.165705979	1.058089955	0.895275731	3.992865732	0.729672762	10	13.559434
2.796380146	2.653513441	1.233547456	4.056780126	0.638909015	8	5.994296
2.179498915	2.144128128	0.918437446	4.688590222	0.528929567	7.25	8.78428
2.188735305	2.157979242	1.084650354	4.638812109	0.885249031	9.55	7.517111
2.073511474	2.141546634	0.773362315	3.91317434	0.615314238	9.05	6.791581
1.529469963	1.777468357	0.527091329	3.16233313	0.654961385	9.75	16.033994
2.025860833	2.061382576	0.575071593	2.591825241	0.471276953	9.75	6.638261
1.170040084	1.715088434	0.02527342	2.581217745	0.538320019	10.75	13.121492
1.897871618	2.12560713	0.533524604	3.302241836	0.589572788	9.5	8.981177
