# Supplementary material for: Decomposing the role of alpha oscillations during brain maturation
Source: eLife. 2022 Aug 25;11:e77571. doi: 10.7554/eLife.77571 (PMC9410707; doi:10.7554/eLife.77571)
Supplement: Figure 2—source data 1. [file elife-77571-fig2-data1.csv]

totalPsdYounger	adjPsdYounger	aperiodicYounger	totalPsdYOlder	adjPsdOlder	aperiodicOlder
1.093	0.014507	1.3122	0.63384	0.0093601	0.69506
1.0041	0.017085	1.2074	0.55041	0.010881	0.61356
0.93204	0.02021	1.1138	0.47777	0.012137	0.54067
0.87785	0.024276	1.0291	0.41366	0.012965	0.47472
0.83911	0.030699	0.9517	0.35821	0.013321	0.41452
0.81121	0.04194	0.88054	0.311	0.013642	0.35914
0.79086	0.058853	0.81466	0.26907	0.01502	0.30787
0.77032	0.078472	0.75332	0.23085	0.017952	0.26013
0.74096	0.096744	0.69594	0.19737	0.021524	0.21548
0.70471	0.11086	0.64205	0.16898	0.025096	0.17354
0.6654	0.11967	0.59123	0.14222	0.029689	0.13399
0.62351	0.12524	0.54317	0.11561	0.036316	0.096581
0.58262	0.13132	0.49757	0.093046	0.045615	0.061092
0.54778	0.14124	0.45419	0.076783	0.059142	0.027335
0.52283	0.15767	0.41284	0.066634	0.07814	-0.0048513
0.50852	0.18112	0.37332	0.061391	0.10251	-0.035607
0.5022	0.20905	0.33548	0.062047	0.13099	-0.065053
0.49835	0.23748	0.29919	0.067412	0.16097	-0.093297
0.49315	0.2638	0.26432	0.07286	0.1908	-0.12043
0.48729	0.28879	0.23077	0.077326	0.22078	-0.14654
0.4811	0.31397	0.19844	0.081891	0.25143	-0.17171
0.47621	0.33973	0.16724	0.089093	0.28432	-0.19599
0.4766	0.36791	0.13711	0.10368	0.32153	-0.21944
0.48266	0.40054	0.10796	0.1263	0.36429	-0.24213
0.494	0.4375	0.079731	0.15309	0.41269	-0.26409
0.50869	0.47657	0.052374	0.18283	0.46609	-0.28538
0.5231	0.51451	0.025835	0.21992	0.52456	-0.30604
0.53307	0.54765	6.46E-05	0.26451	0.58979	-0.3261
0.53213	0.57109	-0.02498	0.31428	0.66161	-0.34559
0.51398	0.5785	-0.049337	0.36885	0.73609	-0.36454
0.47648	0.56436	-0.073046	0.4219	0.80635	-0.38299
0.42203	0.52815	-0.096138	0.46312	0.86302	-0.40097
0.35028	0.47435	-0.11865	0.48214	0.8966	-0.41848
0.2633	0.41008	-0.1406	0.47074	0.90094	-0.43557
0.17213	0.34357	-0.16202	0.42737	0.87462	-0.45224
0.087478	0.28175	-0.18294	0.35572	0.82165	-0.46852
0.010787	0.22821	-0.20338	0.26474	0.74961	-0.48443
-0.055525	0.18405	-0.22336	0.16488	0.66672	-0.49998
-0.10902	0.14961	-0.2429	0.0637	0.58093	-0.51518
-0.15495	0.12415	-0.26201	-0.033617	0.49826	-0.53006
-0.19559	0.10564	-0.28073	-0.12348	0.42271	-0.54463
-0.2291	0.092311	-0.29906	-0.20356	0.35652	-0.55889
-0.2564	0.083073	-0.31702	-0.27422	0.30091	-0.57287
-0.27864	0.077211	-0.33463	-0.33601	0.25636	-0.58657
-0.29613	0.074394	-0.35189	-0.38668	0.22256	-0.60001
-0.31004	0.074431	-0.36882	-0.42536	0.19846	-0.61319
-0.32188	0.076726	-0.38544	-0.45409	0.18194	-0.62612
-0.33223	0.080042	-0.40175	-0.47742	0.17107	-0.63882
-0.34178	0.08308	-0.41777	-0.4966	0.16493	-0.65128
-0.35183	0.085715	-0.43351	-0.5107	0.16259	-0.66353
-0.36119	0.088062	-0.44897	-0.52019	0.16308	-0.67556
-0.37176	0.089871	-0.46417	-0.52781	0.16573	-0.68739
-0.38512	0.090941	-0.47911	-0.53569	0.16974	-0.69902
-0.39934	0.090715	-0.4938	-0.54315	0.17364	-0.71045
-0.41385	0.089287	-0.50826	-0.55102	0.1767	-0.7217
-0.42755	0.088141	-0.52248	-0.55962	0.17982	-0.73277
-0.43946	0.0885	-0.53648	-0.56569	0.18399	-0.74367
-0.44927	0.090291	-0.55027	-0.56848	0.18915	-0.7544
-0.45692	0.092866	-0.56384	-0.57209	0.1946	-0.76496
-0.46413	0.095508	-0.57721	-0.57782	0.19951	-0.77536
-0.47404	0.097868	-0.59038	-0.58471	0.20421	-0.78561
-0.4847	0.10017	-0.60336	-0.59125	0.20967	-0.79572
-0.49175	0.10293	-0.61615	-0.59523	0.21592	-0.80567
-0.49681	0.10672	-0.62876	-0.59724	0.22227	-0.81548
-0.50316	0.11114	-0.64119	-0.5994	0.2285	-0.82516
-0.50893	0.11524	-0.65346	-0.60111	0.23446	-0.8347
-0.51362	0.1193	-0.66555	-0.60253	0.24021	-0.84412
-0.51994	0.12391	-0.67748	-0.60526	0.24615	-0.85341
-0.52766	0.12841	-0.68926	-0.60988	0.25195	-0.86257
-0.53534	0.132	-0.70088	-0.61321	0.25657	-0.87161
-0.54396	0.13451	-0.71235	-0.61725	0.2595	-0.88054
-0.55384	0.13587	-0.72368	-0.62458	0.26054	-0.88936
-0.56489	0.13631	-0.73486	-0.63373	0.25976	-0.89806
-0.57713	0.13648	-0.7459	-0.64505	0.25732	-0.90665
-0.58819	0.13678	-0.75681	-0.65899	0.25324	-0.91514
-0.59647	0.13778	-0.76759	-0.67421	0.24809	-0.92353
-0.60362	0.1398	-0.77824	-0.68905	0.24287	-0.93182
-0.61102	0.14221	-0.78876	-0.70253	0.23769	-0.94
-0.61891	0.14402	-0.79915	-0.71546	0.23178	-0.9481
-0.62665	0.14449	-0.80943	-0.72996	0.22468	-0.95609
-0.63563	0.1434	-0.81959	-0.74602	0.21633	-0.964
-0.64659	0.14125	-0.82964	-0.76206	0.20702	-0.97182
-0.65864	0.13922	-0.83957	-0.77875	0.19734	-0.97955
-0.67022	0.13814	-0.84939	-0.79681	0.18732	-0.9872
-0.67842	0.13716	-0.85911	-0.81671	0.17731	-0.99476
-0.68733	0.13477	-0.86872	-0.83633	0.16736	-1.0022
-0.70116	0.13115	-0.87823	-0.85465	0.15683	-1.0096
-0.71489	0.12736	-0.88764	-0.87372	0.14515	-1.017
-0.72475	0.12389	-0.89695	-0.89483	0.13268	-1.0242
-0.7353	0.12038	-0.90616	-0.91571	0.12099	-1.0314
-0.74904	0.11643	-0.91528	-0.93217	0.11128	-1.0385
-0.76235	0.11199	-0.9243	-0.94592	0.10309	-1.0455
-0.77432	0.10752	-0.93324	-0.96092	0.095324	-1.0524
-0.78658	0.1034	-0.94208	-0.97624	0.087802	-1.0593
-0.79902	0.099864	-0.95084	-0.98954	0.08103	-1.0661
-0.81195	0.09673	-0.95952	-1.0016	0.075259	-1.0729
-0.82392	0.093327	-0.9681	-1.0139	0.069966	-1.0796
-0.83393	0.089874	-0.97661	-1.0269	0.064779	-1.0862
-0.8446	0.086653	-0.98504	-1.0398	0.05996	-1.0928
-0.85725	0.08296	-0.99339	-1.0513	0.055734	-1.0993
-0.87009	0.07878	-1.0017	-1.0613	0.0522	-1.1057
-0.88121	0.075165	-1.0098	-1.07	0.049191	-1.1121
-0.8909	0.072888	-1.018	-1.0788	0.04645	-1.1184
-0.89988	0.071765	-1.026	-1.0883	0.044201	-1.1247
-0.90835	0.071359	-1.034	-1.0968	0.042457	-1.1309
-0.91525	0.071556	-1.0419	-1.1032	0.040897	-1.137
-0.91966	0.072395	-1.0497	-1.1081	0.039715	-1.1431
-0.92484	0.073301	-1.0575	-1.1123	0.039548	-1.1491
-0.93199	0.073553	-1.0652	-1.1154	0.04006	-1.1551
-0.93906	0.072936	-1.0728	-1.1184	0.040522	-1.1611
-0.94774	0.07097	-1.0804	-1.1249	0.04041	-1.167
-0.95864	0.068373	-1.0879	-1.1339	0.039592	-1.1728
-0.96942	0.06639	-1.0953	-1.1422	0.038935	-1.1786
-0.97805	0.065322	-1.1027	-1.15	0.038687	-1.1843
-0.98486	0.06453	-1.11	-1.1565	0.03801	-1.19
-0.99298	0.06385	-1.1173	-1.1628	0.036414	-1.1957
-1.0025	0.063213	-1.1245	-1.1722	0.034469	-1.2013
-1.0097	0.061979	-1.1316	-1.1831	0.032837	-1.2068
-1.0165	0.060507	-1.1387	-1.1932	0.031387	-1.2123
-1.0273	0.058788	-1.1457	-1.2024	0.02967	-1.2178
-1.0384	0.056756	-1.1527	-1.2106	0.027994	-1.2232
-1.0451	0.055272	-1.1596	-1.2171	0.027101	-1.2286
-1.0516	0.054236	-1.1665	-1.2233	0.027195	-1.234
-1.061	0.053261	-1.1733	-1.2297	0.027825	-1.2393
-1.0701	0.052374	-1.1801	-1.2353	0.028284	-1.2445
-1.0775	0.051531	-1.1868	-1.2424	0.028128	-1.2498
-1.0862	0.049978	-1.1934	-1.2512	0.027479	-1.2549
-1.0955	0.0481	-1.2	-1.2596	0.026942	-1.2601
-1.1042	0.047267	-1.2066	-1.2668	0.026568	-1.2652
-1.1108	0.047767	-1.2131	-1.2723	0.026185	-1.2703
-1.1148	0.048903	-1.2196	-1.2783	0.025929	-1.2753
-1.1204	0.049844	-1.226	-1.2862	0.02577	-1.2803
-1.1281	0.050035	-1.2324	-1.293	0.025793	-1.2852
-1.1357	0.049393	-1.2387	-1.2986	0.026272	-1.2902
-1.1434	0.048739	-1.245	-1.3037	0.026891	-1.2951
-1.1521	0.048554	-1.2512	-1.309	0.027192	-1.2999
-1.1609	0.048242	-1.2574	-1.315	0.027316	-1.3047
-1.1661	0.048077	-1.2636	-1.3211	0.027708	-1.3095
-1.1692	0.048757	-1.2697	-1.3263	0.028786	-1.3143
-1.1732	0.04944	-1.2757	-1.3298	0.029958	-1.319
-1.1787	0.049508	-1.2818	-1.3318	0.030406	-1.3237
-1.1846	0.049064	-1.2878	-1.3364	0.030193	-1.3284
-1.189	0.048532	-1.2937	-1.3444	0.029404	-1.333
-1.1938	0.048306	-1.2996	-1.3505	0.028839	-1.3376
-1.1997	0.048289	-1.3055	-1.3529	0.029394	-1.3421
-1.205	0.04853	-1.3113	-1.3552	0.030687	-1.3467
-1.2114	0.04898	-1.3171	-1.3584	0.031871	-1.3512
-1.2195	0.048812	-1.3228	-1.3609	0.032218	-1.3557
-1.2252	0.047602	-1.3286	-1.364	0.031148	-1.3601
-1.2279	0.045403	-1.3342	-1.368	0.029033	-1.3645
-1.231	0.041735	-1.3399	-1.3716	0.026325	-1.3689
-1.2343	0.03669	-1.3455	-1.3734	0.022853	-1.3733
-1.2373	0.031412	-1.3511	-1.3742	0.019199	-1.3776
