# Supplementary material for: Decomposing the role of alpha oscillations during brain maturation
Source: eLife. 2022 Aug 25;11:e77571. doi: 10.7554/eLife.77571 (PMC9410707; doi:10.7554/eLife.77571)
Supplement: Figure 3—source data 1. [file elife-77571-fig3-data1.csv]

onefInt	onefSlope	indAlphaTotal	indAlphaRel	indAlphaAdj	IAF	age
1.984472217	2.146636768	0.420721469	2.514058177	0.239059542	8.15	7.266411185
1.928023159	2.132419524	0.587833502	3.13540473	0.536422731	8.75	9.492331416
0.837371548	1.461234151	0.048437291	3.268647034	0.569844147	9.7	21.3994988
2.170922659	2.277052109	0.651143707	2.906104107	0.457554789	8.65	9.681247155
1.66319788	1.953255569	0.488704085	3.510067442	0.685432346	10.15	15.15980359
1.221876869	1.577379612	0.238022921	2.718765789	0.615823985	11.5	19.74580161
2.049678547	1.931434966	0.806179366	3.245668568	0.288530348	7.4375	9.171996032
2.170278057	2.025148797	0.942892781	3.509634365	0.455971687	8.15	8.13980424
0.998941855	1.423424627	0.372879198	4.092888545	0.780139988	10.95	21.29545825
2.275824352	2.379560021	0.584207776	2.635890762	0.326935307	8.3	6.628478327
1.853516493	2.161950979	0.384790279	3.004202859	0.371795082	8.35	9.32805686
2.00813281	2.161270233	0.501128967	2.844915483	0.633656094	10.95	8.635365817
2.146108122	2.216232771	0.599390674	2.82501058	0.383606815	8.65	7.455326924
1.863697693	2.057174784	-0.198306064	2.022002457	0.277596469	9.25	11.15424234
2.070498076	2.081351464	0.424312266	2.119159259	0.341640137	10.2	10.11657473
1.990309873	1.966096631	0.849080992	3.76182798	0.648495903	9.35	13.46777567
1.4015348	1.843426435	0.384091425	3.576424625	0.672532366	9.45	14.8969643
1.955748982	2.113853731	0.34547587	2.290281046	0.254183008	8.9375	12.51224533
1.985760975	2.168686353	0.38531686	2.343020927	0.227215376	8.2	7.041902625
2.204350596	2.299231787	0.876639955	3.759999902	0.523310267	8.125	8.870826013
2.095087242	2.273184331	0.43164816	2.335419279	0.502224214	10.15	10.17133291
1.977664427	2.160968926	0.536705018	2.856800445	0.479325973	9	8.301340886
1.466906041	1.919361386	0.209045753	2.991620545	0.589429425	10.35	15.47740107
1.834966868	2.085363986	0.504174513	3.497424237	0.613634489	9.75	11.67170719
1.629682815	2.117952534	0.059481078	2.208796904	0.404611192	9.75	10.83116905
1.776921959	1.782810602	0.675364169	3.505658939	0.48785387	9	11.31577899
1.991788174	2.064396817	0.624679667	3.103063452	0.437713582	8.7	10.04265118
2.023451704	2.28027721	0.564651126	3.029051993	0.637296453	9.5	11.89895366
1.325191789	1.826215706	0.191987897	3.084803835	0.450930711	8.65	13.42396912
1.692930956	1.955830588	0.523638428	3.302630702	0.659361925	9.8	11.61147319
2.009854671	2.121627613	0.605463825	3.014818641	0.596720367	10	11.9701393
1.973397274	2.063099709	0.502529345	2.508163702	0.479166866	10	10.3438212
2.043785378	2.378468496	0.560949788	3.394657358	0.566517335	8.666666667	8.862612285
1.980832917	2.093164604	0.497505929	2.741136021	0.383161127	8.5	6.959765347
1.699815512	2.078732892	0.702476406	4.624393873	0.85408489	9	12.62449961
1.75885538	2.011089487	0.255692499	2.417320852	0.446864251	10.5	11.56766664
1.917088837	2.143752549	0.317206357	2.163480756	0.204973559	8.2	12.88186308
1.960525282	2.114915744	0.730698189	3.140550669	0.692317299	9.5	10.19049828
1.846261208	1.908267001	0.543481253	2.957034218	0.425360949	9.25	8.99403193
2.127503725	2.152411385	0.524239584	2.814119622	0.464310903	8.875	8.024812051
1.811146528	2.167749994	0.448863866	3.468212248	0.569566734	9	9.746956977
1.467969171	1.952541169	0.386428504	4.138204915	0.75415281	9.9	21.89779829
1.922776962	1.858370948	0.637804251	2.137752815	0.256605175	10.5	9.522448418
1.006074499	1.454843208	-0.133041474	1.811463839	0.236355074	10	19.84436634
1.178849607	1.512262632	0.43920538	3.730960723	0.690503831	10.05	20.10446772
2.164578752	2.170050426	0.670741508	2.778646468	0.434027199	9.0625	9.024148932
1.574792836	1.947353079	0.545867949	4.188658736	0.717545912	9.1	12.69568525
0.44045056	1.268402643	-0.422202706	2.332241704	0.370144895	10.55	20.7478764
0.851867889	1.685538307	-0.453649393	2.037829776	0.309492764	9.9375	18.708134
0.960068172	1.683780994	-0.425856441	1.764708332	0.386313457	11.9375	21.43509162
0.945232409	1.346434416	0.03286295	2.286537669	0.40649399	10.75	20.89298559
2.119021879	2.177827424	0.951570572	3.591974516	0.558634908	8.583333333	6.278025941
1.864368819	2.1299077	0.720917224	4.166173478	0.721612625	8.75	11.54850127
0.957429747	1.543258172	-0.087553703	2.768816032	0.356773771	9.3	20.4248031
0.604519035	1.127914823	0.081727371	3.40313712	0.551926403	10.16666667	20.87929604
0.763440129	1.352926963	-0.44604115	1.553642579	0.271514755	11.91666667	19.41177668
1.070702449	1.71919267	0.252785006	3.073517836	0.657596305	8.45	19.42272831
1.328257345	1.629721054	0.688695652	3.854678559	0.862501628	9.55	20.62467048
1.199732256	1.611380157	0.394814531	3.396393712	0.573986495	8.5	21.41045044
0.915869754	1.599204591	-0.188108176	2.548727442	0.468320942	10.85	17.72248666
0.964479674	1.549579611	0.190461927	3.320831238	0.784884161	11.3	18.2947097
0.982114977	1.587931877	0.063185965	3.623758905	0.597322702	10.2	18.31387506
1.368306718	1.885475056	0.379681659	3.948545638	0.753288013	9.6	19.17357857
1.67117	1.890558388	0.544676039	3.066918576	0.487647254	8.125	11.86062293
1.130291175	1.627165178	0.342680675	3.858525991	0.754511541	10.05	16.32889085
0.912834796	1.424241332	0.193120653	3.549473523	0.618817215	9.9	19.14346157
0.670200227	1.099378556	-0.041110534	2.943947493	0.491698827	10.6875	19.05584847
1.328839276	1.70035456	0.454156621	4.313070637	0.665171184	9.25	18.69170654
1.128556269	1.601113731	0.350654824	3.696136044	0.771402151	10.45	18.31935088
1.029025	1.515432842	-0.007589983	2.359213505	0.500821663	11.55	18.97371119
0.882787669	1.324401584	0.422868109	3.23495331	0.629882978	9.833333333	19.36249431
1.250798262	1.762809152	0.211948467	2.653562125	0.204678898	7.875	19.54867214
1.185286305	1.686929624	-0.07391614	2.214288561	0.180098489	8.583333333	18.99287656
0.994300813	1.684976202	-0.273163507	2.77153425	0.57187715	10.875	16.91480343
1.428595974	1.896201788	0.18732713	2.782646276	0.511387717	9.7	17.67046639
1.141057212	1.647206925	0.129974226	3.046662989	0.609122586	10.8	18.22078615
1.234517842	2.003177541	0.297282825	4.860571349	0.950897948	9.95	18.2372136
1.359838251	1.820882579	0.633327069	4.487421389	0.849399471	8.55	18.89157392
1.277658785	1.79040412	0.004599993	2.122847041	0.404911076	9.9	18.44529471
1.000751466	1.515021691	0.003094187	2.332067975	0.375053926	9.5	17.52261929
0.986559915	1.637491331	-0.220716292	2.07798812	0.392049379	10.65	20.22219782
1.039586103	1.64199384	0.125141151	3.224867762	0.403038393	7.6	18.71634772
0.823382869	1.450610679	0.009809176	3.40431912	0.579744801	10.3	19.11882039
1.895141835	2.055721927	0.462105974	2.690400286	0.52908305	10.2	10.9050926
0.908837629	1.536329534	-0.065113509	2.474656678	0.625467855	11.375	19.07501384
1.069384202	1.610290908	-0.371306927	1.818678484	0.094388489	8.666666667	16.76148051
1.078593789	1.860101695	-0.356743887	2.873198888	0.191347994	7.25	19.30773612
1.837329022	2.069477863	0.610894969	3.458971559	0.745506529	9.8125	14.24260399
1.419201161	1.77184566	0.161196867	2.192280033	0.53678373	11.45	17.78819648
0.95729544	1.454933136	0.375256835	4.339709244	0.80334794	10.15	21.29819616
1.681994428	1.967711234	0.86176663	4.604518367	0.812472388	8	19.93745526
1.714049989	1.794047208	0.528295508	2.921395856	0.46206149	9.5	9.77433607
1.933753361	2.023401252	0.844998934	3.915059715	0.725026311	9.2	11.88526411
1.543875275	1.961014151	0.174434057	2.357685473	0.558743409	10.8	17.40215128
1.260490379	1.858149627	0.518870008	4.810939241	0.971019136	9.55	18.03187041
1.031200581	1.679580614	-0.116498309	2.296859746	0.377222829	9.35	17.61844611
1.852586592	2.07962831	0.564435293	3.225537665	0.634969112	9.6	12.5916447
1.93370745	2.068211885	0.581374421	2.941022516	0.467722567	8.6875	9.089858754
1.876417464	2.034963129	0.526404981	2.773500055	0.521555331	9.55	11.2911378
1.049184906	1.472631302	0.186257289	2.632443801	0.494607214	9.55	19.3898734
1.121164884	1.48741441	0.254495514	3.316927013	0.633382717	11.35	16.25222939
1.209954743	1.623396175	0.109238158	2.21097948	0.389891489	9.55	18.11400769
2.044085431	1.93993141	0.831181517	3.297168316	0.434613679	8.4	9.024148932
1.79479214	1.895865867	0.632851122	3.189197314	0.585488036	9.55	10.55464021
1.923132163	2.08532206	0.55608702	3.025741462	0.536024492	9.35	10.45059966
1.784226542	1.95440933	0.239778706	1.962471819	0.177691842	9	11.85788502
1.694965636	1.877057933	0.376066056	2.86189703	0.440375992	9.85	12.50676951
1.520739448	1.639295002	0.703620168	4.18323668	0.711385685	9.75	14.71626229
1.651068727	1.867925383	0.13426305	1.774929801	0.308751812	10.65	16.48221377
1.711191331	1.971973575	0.500329095	3.44381509	0.59373264	9.45	14.05368825
1.641298351	1.979152341	0.12597459	2.256145512	0.292216131	9.4	7.488181835
1.896966005	1.922260842	0.752595152	3.425854311	0.568287496	9	11.44446072
2.217751445	2.433864318	0.90790945	4.304138162	0.794382148	8.55	14.52460864
2.113300139	2.141609895	0.68428455	2.888957473	0.538930649	9.5	8.137066331
2.027325431	2.062635929	0.578165643	3.102381265	0.41550802	8.625	9.40471832
1.919378043	2.066362737	0.709803083	3.203187892	0.510290937	8.05	13.65669141
1.796918009	1.793115695	0.400032754	2.035527674	0.191810203	9	8.873563922
1.483840745	1.985300395	0.206299344	2.835029786	0.580751712	9.3125	16.75600469
1.002139429	1.526313445	0.466560738	4.629109355	0.95927356	10.7	18.46719798
0.973045445	1.338068057	0.114983188	2.712331639	0.223812742	7.7	17.70879712
1.624733625	1.965986632	0.277902236	2.653206738	0.394342139	8.9	10.86676187
1.750356297	1.673881533	0.836656732	3.563439633	0.512711932	8.35	13.91679279
1.785525375	1.727057345	0.694743203	2.807214956	0.483150198	9.35	10.70248731
1.641964172	1.779641505	0.673212531	3.712442285	0.64290505	9.25	14.32200336
2.152053744	2.217611768	0.731992763	3.060297096	0.567664939	9.1	10.85581023
1.854563491	1.958391479	0.44424211	2.379301245	0.347200967	9.1	13.05435137
1.421575998	1.960027547	0.120967814	2.664534643	0.599907392	10.5	20.35909328
1.540819177	2.018457871	0.278182883	3.077632793	0.514392974	8.8	15.53215925
1.908625365	1.918589879	0.398524655	1.917020918	0.302230008	10	8.383478164
1.63130771	1.580094579	0.515493495	2.372720248	0.347836377	9.65	11.03925015
2.011855102	2.344665986	0.27929916	2.494449594	0.162264926	8	9.725053703
1.707881994	1.997081228	0.543006455	3.525104048	0.64894806	9.3	13.22683965
1.943698037	2.227302924	0.18936539	1.78212577	0.336485247	10.25	10.55464021
1.687699125	1.989640254	0.374371304	2.483544051	0.529620746	9.7	13.69776004
1.823165805	1.936585819	0.26293488	1.810275799	0.201712323	9.35	10.33286956
0.769173667	1.148096984	-0.005284584	2.37443277	0.333234005	10.4	19.81972516
1.092051976	1.723221216	-0.066335554	2.681036	0.362478008	8.85	16.02498292
1.019053819	1.579755851	0.380640707	4.363724368	0.813744341	9.5	21.80744728
1.466883277	1.928135863	0.125196713	2.389962416	0.466728073	9.85	11.6443281
1.822451216	1.847093747	0.346702641	1.909874162	0.337034332	10.3125	11.96466348
1.985549303	2.105247128	0.618897413	3.214034602	0.601763415	9.8	7.835896312
1.813007937	1.960827908	0.559698802	3.308084611	0.392002088	8.2	11.12686325
0.682505554	1.285038449	-0.022779269	3.807672664	0.54073623	10.5	17.87307167
1.240024608	1.680853444	0.132937827	2.658908519	0.506610449	10.3	12.07144194
1.513308939	2.19320843	0.030263107	2.335580076	0.552264997	10.0625	11.36232344
0.913240771	1.667545079	-0.456764537	1.945039474	0.334045167	10.5625	17.00789234
1.096841574	1.329824131	0.101784908	2.296517775	0.273925326	10.2	16.7587426
1.912776652	2.134323865	0.496667239	3.348159549	0.307806063	7.5	9.883852441
2.141507657	2.168954354	0.792777691	3.52915268	0.625795161	9.35	7.65793221
1.055295075	1.334575124	0.199759175	2.318733082	0.489957452	11.1	20.6602633
1.533150443	2.02951602	0.154683078	2.609924383	0.492300295	9.55	18.43434307
2.039853418	2.270310176	0.165101277	2.48847866	0.109153897	7.25	12.40546687
1.96059765	2.179218768	0.429405501	2.754749658	0.524456078	9.4375	10.37667611
1.71880665	2.160948223	0.333740903	3.335351586	0.601340614	9.5	10.27811137
0.753705455	1.206060034	-0.108773364	2.010399094	0.214948604	9.05	15.61429653
1.64251194	1.965254383	0.306184906	2.737071101	0.501062403	9.8	14.03726079
1.599430668	2.051279285	0.076323789	2.257589336	0.362488609	9.5	16.03593456
1.814163	2.019053921	0.163146359	2.485778885	0.278223926	8.625	8.742144278
1.734788271	1.834963612	0.512694556	2.930379257	0.464658125	9.5	10.98449196
1.186332546	1.741378293	0.1205998	2.793892135	0.541858207	9.6	20.28243182
1.145592607	1.583458462	0.257920432	3.019762788	0.695164175	11.15	21.64591064
1.565234248	1.592743042	0.543566711	2.643084252	0.402044661	9.25	7.373189646
1.705342303	1.928619528	0.364033637	2.531058335	0.519997949	10.4	14.9845774
0.969844436	1.460781118	0.338806073	3.430918037	0.721903951	9.65	20.52884366
1.557585504	1.898515404	0.603735327	4.262736689	0.807208142	9.65	14.9270813
2.112783995	2.096560737	0.728308613	2.968049423	0.346492809	8	7.463540652
1.803752779	2.026507522	0.480972283	2.963786938	0.414427768	8.45	8.753095915
1.784557899	1.901449595	0.420965202	2.19682741	0.249684558	8.3	7.386879192
1.981024579	2.232985934	0.635352913	3.233077166	0.71906087	9.6	14.82851657
1.722120574	1.925586475	0.48619698	3.246695528	0.354397948	7.95	8.109687238
1.676832818	1.739155121	0.80104071	3.842691176	0.528701461	7.7	11.40339208
1.757475744	2.033156702	0.100508895	2.040352843	0.472363031	10.625	8.887253469
1.186511497	1.738395967	-0.173283618	1.826154602	0.222453009	9.55	13.49241685
1.892135846	1.935226697	0.386574837	1.718706073	0.237609102	10.75	10.54368857
1.00606074	1.409450884	0.299824112	3.551177114	0.616225799	9.85	19.77591861
1.64599229	1.951301012	0.340088036	2.920729168	0.648395593	11.2	13.80453851
2.035739824	2.127943751	0.65920942	3.294940367	0.533690703	9.15	10.20966364
1.29834296	1.810702714	0.434549921	4.185417034	0.718420698	8.7	17.59380493
1.087515925	1.683327492	0.316187428	4.81107534	0.743226192	9.15	17.00515443
1.532183425	2.045120212	0.058013058	2.500481739	0.406899565	9.65	14.98183949
1.232515305	1.96022826	-0.260532728	1.915563793	0.398151827	10.4	19.79782188
1.594851936	1.950135652	0.712259841	4.012493883	0.807434395	8.6	20.01685462
1.610305743	1.889910033	0.195215973	2.215804089	0.369712987	10.05	15.60060698
1.416107131	1.896599912	0.225114641	3.040368549	0.415891768	8.4	15.87987373
1.724413507	1.931652012	0.333238481	2.278844895	0.342136554	9.25	14.55472564
1.718298585	1.680809367	0.506280348	2.394570434	0.304526627	9.25	8.709289367
1.651612485	1.885724462	0.481107078	2.768535161	0.51380241	9.15	13.52527176
1.773754632	2.085070063	-0.260349801	2.553635776	0.078578848	7.25	11.93180857
1.714664343	2.058181803	0.30106934	2.952586212	0.561832136	10.3	10.00979627
1.068178145	1.651805043	0.101575289	3.776580858	0.551784308	9.5	16.51233077
1.87118067	2.06813767	0.324376701	2.334065165	0.364235899	9.6	7.835896312
1.603049674	1.916106957	0.779986172	4.203314458	0.828245898	8.5	21.35295434
2.147050559	2.265718664	0.461599446	2.39378997	0.308653356	8.8125	8.482042898
1.982528765	2.199662124	0.564448138	3.309684274	0.610185027	9.55	10.7572455
1.251592876	1.890465588	-0.022871815	2.755864546	0.434826637	9.3	21.2215347
1.811389113	1.873253591	0.209728705	1.506188154	0.118430192	9.125	10.2562081
1.892038506	2.258366242	0.584657317	3.957097281	0.768574644	9.5	12.24940604
1.020829777	1.359970385	0.415664839	3.074298923	0.826198742	12.45	20.21945991
1.238125798	1.691957616	-0.105036698	1.821649805	0.386006453	11.5	20.216722
1.937502909	2.070840908	0.663386562	3.555458955	0.312200559	7.375	8.777737098
1.944216433	2.100896308	0.740446815	3.764905009	0.603118761	8.6	10.72439058
1.908545661	2.042057242	0.620979909	3.13934583	0.273965647	7.25	11.08853252
1.08700419	1.581337207	0.187052182	3.435384826	0.54135721	9.35	21.27081707
1.356070787	1.427242582	0.328138741	2.178304526	0.316031263	9.95	9.667557609
2.138328463	2.310552208	0.487801246	2.631962395	0.614181692	10.75	11.0529397
1.530929622	1.5307545	0.739236539	3.309446947	0.670305865	10.3	14.68066947
1.817484717	1.980069975	0.296285255	2.064147176	0.421924485	10.75	11.15971816
2.19641414	1.877557733	0.838823658	2.393619366	0.408638897	9.6875	13.65669141
1.919308	2.156792828	0.416737328	2.617082033	0.432410237	9.1	11.39244044
1.554264466	2.02379802	0.45755871	3.883573708	0.788279045	9.75	14.56293937
1.745805296	2.050238285	0.691050241	3.323437018	0.357100692	7.25	13.05435137
1.997224195	2.129074369	0.642362204	3.258724014	0.524341443	8.85	11.19531098
1.213795058	1.723656162	0.231624984	3.609786551	0.530444422	8.8	13.45956194
2.280918374	2.242444386	0.154093822	2.906333736	0.055137305	7.25	6.390280221
1.698797695	1.898425132	0.661757885	4.023851676	0.627750384	8.75	12.06870403
1.226489992	1.621151501	0.288285346	3.742028207	0.550785699	9.5	14.53556028
0.775663836	1.195550084	-0.053819377	2.272978419	0.333391996	10.55	18.13591096
1.14231656	1.483661823	0.186260755	2.673001522	0.482557856	10.5	18.27554433
2.407774875	2.139260755	0.997260351	2.500293455	0.708227023	10.95	12.8572219
2.10023878	2.242058955	0.658653555	3.281957369	0.688601743	10.1	10.36572447
1.890601995	2.071844786	0.583364624	2.979184064	0.584994	9.45	13.94143397
1.85338083	1.807326728	0.820141152	3.677960473	0.324930906	7.25	7.28283864
1.842431713	1.965332502	0.559307502	3.079006224	0.422672919	8.6	8.706551457
1.866017582	1.888887745	0.728890399	3.746797048	0.546854393	9	8.690124002
1.815019548	1.89992537	0.564213698	2.818107955	0.431311577	8.9	10.36024865
1.72160003	1.861084122	0.178146889	1.563061173	0.200313173	9.85	10.16038128
2.17765986	2.045319153	1.070531461	3.740598324	0.545649079	7.5	11.56492873
2.169886509	2.079034284	0.792968715	3.037382124	0.712713022	10	10.79557623
1.811373311	1.85013193	0.735673746	3.444961872	0.703705021	10.35	9.571730785
1.906937744	1.984813664	0.618847494	3.414501341	0.259793871	7.3	10.00158254
1.912577727	1.850238123	0.878004525	3.807961059	0.62927968	8.833333333	7.088447083
0.878942825	1.62690125	0.069547414	3.791855514	0.723733218	9.95	17.97985013
1.936571702	2.091655685	0.488586763	2.685295338	0.533998045	10.05	11.89895366
1.914579886	2.162890821	0.503567631	2.849416154	0.577179797	9.5	8.742144278
1.693128353	1.919193926	0.844511196	4.315892898	0.940870057	9.75	19.9511448
2.040512963	2.083281677	0.729596176	3.492109868	0.551360632	9.05	11.37327508
1.792273765	2.002085389	0.577837929	3.671435554	0.620845472	9.45	12.79424999
1.329100022	1.739384623	0.424261806	4.213664411	0.640643292	8.95	19.68830551
1.898571884	1.919917489	0.683725769	3.854834664	0.599853335	10	10.81474159
1.766454805	2.048624223	0.489967953	3.158697617	0.62179155	9.7	12.54510024
1.272895887	1.660327572	0.266597775	3.059110279	0.330562362	7.65	15.13790032
1.736121353	2.049774696	0.416401089	2.866669243	0.650125405	9.75	12.06596612
1.371319991	1.486300061	0.65775559	3.881861072	0.668172583	9.7	12.26035768
2.047518048	1.869260621	0.574290212	2.120041857	0.355909367	9.75	8.189086607
1.861758355	1.811450746	0.680832038	2.904066393	0.332693404	8.15	9.568992875
2.116705673	2.13938394	0.641077131	3.222894685	0.639613762	9.625	10.25073228
2.000075529	2.006395754	0.607247585	2.643175147	0.377842222	8.85	6.508010319
1.995883616	2.195371456	0.573133883	3.274403045	0.571591551	9.3	8.128852603
1.141481575	1.480119903	0.097046541	2.166043507	0.30603758	9.45	15.0749284
1.810415874	1.921480367	0.333556043	1.809214497	0.317374145	9.75	9.538875873
1.453216306	1.634680311	0.520054261	3.639748805	0.618038153	10.1	15.69095799
1.323114633	1.576631795	0.207760765	2.406397511	0.350531612	9.7	17.37203428
0.980646389	1.556534668	0.044108358	3.07720573	0.61587181	11.1	16.50959286
1.749681135	1.790287628	0.671704671	3.303860901	0.596174423	9.8	13.6840705
1.786159552	1.90515779	0.58125639	3.107680396	0.524985025	9.3	13.6840705
1.767833729	2.108977565	0.514791435	3.291541897	0.579977964	8.65	10.00705836
1.616488845	1.890655589	0.403325535	2.376347906	0.347150547	9.166666667	10.95437496
1.833399159	1.946922424	0.395995491	2.474866857	0.440837092	10.4	11.47457772
1.756512517	2.04982715	0.552445763	3.442447725	0.514583572	8.15	12.7394918
1.586168037	1.916403395	0.172405483	2.327098707	0.356306031	9.6	15.29122324
1.528734459	1.964161077	0.337610346	3.329396143	0.627591782	9.65	13.44313448
2.147618845	2.228182039	0.867383159	3.536720512	0.733159432	9.625	12.16179295
1.964040439	2.230416857	0.634103225	3.694008448	0.555750062	8.25	12.02489748
0.623950825	1.165376373	-0.327671975	0.819005309	0.037077274	10	17.51166765
1.951074647	2.050296627	0.478574537	2.618880299	0.373584797	9.0625	7.518298837
2.141477979	2.147384032	0.747876609	3.151786743	0.129815624	7.25	7.211653
1.833916407	2.042053031	0.221804512	2.363424456	0.328601166	8.833333333	10.03991327
2.131023249	2.24247527	0.884097817	3.999210758	0.612178309	8	12.07144194
1.762308961	1.922252703	0.520251558	3.080350925	0.398206616	8.166666667	13.0926821
1.958828234	1.983575256	0.375299736	1.721470032	0.265988902	9.75	7.312955642
1.602101911	1.846429168	0.347041092	2.663864909	0.39039025	9.05	13.38563839
2.077456573	2.206584123	0.767606725	4.005191213	0.692962733	8.5	9.437573231
2.082564994	1.989588763	0.747483946	3.083264873	0.570141147	10.25	13.03244809
0.923521694	1.437092385	-0.086360681	2.29328508	0.14338924	8.125	16.14271302
1.450001574	1.66771491	0.20837336	2.037398925	0.450183129	11.55	14.85589566
1.949400883	2.17976243	0.538203105	2.848303379	0.448429259	8.4	14.97088785
1.758293451	2.025421287	0.582053454	3.81045496	0.657767557	9.25	14.97088785
1.890976461	1.829937635	0.710031631	2.56932368	0.619421971	10.8	10.85033441
1.39749568	1.741151495	0.35294391	3.299833466	0.431244933	8.25	16.50959286
1.955760695	2.095998705	0.674739183	3.22635179	0.617130632	9.25	13.5964574
1.800780411	1.934757414	0.306733313	1.88211057	0.343008025	10.1	11.45267445
1.971122321	1.947379128	0.574829056	2.50929253	0.350174991	9.1	8.900943015
2.117463782	2.058071334	0.514484856	1.757508495	0.484905982	11.25	9.489593507
1.591115245	1.897829698	0.406921242	2.706217822	0.55886777	9.55	14.92434339
1.841499299	1.975118493	0.613733445	3.349555962	0.687382465	10.5	13.47051358
1.865989731	2.038267078	0.669713028	3.221936913	0.607589831	8.9	12.57795516
1.644021038	2.003613522	0.516596706	3.587679599	0.781350555	10.15	14.36854781
1.222707906	1.613817348	0.557317507	4.693074301	0.8799946	10.25	15.80047436
1.628104534	1.742940633	0.574760939	3.326107445	0.678265462	11.05	14.54651192
1.214342893	1.778781244	0.045127825	3.190152088	0.497883274	9.85	15.68822008
1.847665848	1.927307964	0.509817585	2.128064931	0.30547847	9.583333333	7.80577931
1.563297637	1.781754933	0.602663719	3.993358818	0.65293671	9.25	15.7840469
2.094875807	2.280475562	0.708975382	3.700865612	0.507821188	8	13.08994419
1.524150611	1.867387283	0.76988072	4.503822463	0.832062608	8.3	14.39866482
1.66343537	1.967011308	0.476971694	3.378751198	0.702280539	10.3	15.1625415
1.249210824	1.754038997	0.066004209	1.891774037	0.251955737	9.75	15.46644943
2.108934763	2.177233165	0.458668755	2.168042101	0.243523363	8.5	7.176060179
2.271914412	2.247749194	0.66695271	2.685399149	0.397988864	9	6.335522035
1.712904873	1.746378555	0.784675191	3.435998736	0.449208716	7.4	19.77044279
2.225440214	2.319711844	0.089409908	1.495342324	0.117649214	9	7.896130315
2.072585506	2.118182161	0.694645704	3.297779713	0.510462377	9	10.49440621
1.50608089	1.852996109	0.221154464	2.647999978	0.372861617	9.05	13.40754166
2.151534333	2.313657053	0.588248576	3.041267086	0.551389855	9.4	8.900943015
1.296246671	1.846283906	0.03776327	2.830006392	0.526858681	10.45	15.90999073
1.234141498	1.686332415	0.192797732	3.134716767	0.48788926	9.125	12.27678514
1.841753559	1.826890648	0.984601481	4.287163835	0.846270078	9.75	13.30623902
1.929455054	1.739782761	0.543667099	1.872398748	0.311570033	10.125	11.36506135
2.245020381	2.608949323	0.520289657	2.775668132	0.653413781	9.35	10.64772913
2.232213512	2.205583598	0.733857627	3.431580648	0.261434517	7.5	8.799640372
1.167729327	1.708538341	0.252275422	3.730404148	0.760729656	10.75	16.41650394
