# Supplementary material for: Decomposing the role of alpha oscillations during brain maturation
Source: eLife. 2022 Aug 25;11:e77571. doi: 10.7554/eLife.77571 (PMC9410707; doi:10.7554/eLife.77571)
Supplement: Table 1—source data 1. [file elife-77571-table1-data1.csv]

;age (beta);age (CI lower);age (CI upper);gender (beta);gender (CI lower);gender (CI upper);diag ADHD (beta);diag ADHD (CI lower);diag ADHD (CI upper);diag other (beta);diag other (lower);diag other (upper);age*gender (beta);age*gender (CI lower);age*gender (CI upper)
alpha peak frequency;0.42;0.34;0.49;-0.08;-0.15;-0.02;-0.09;-0.19;0.01;-0.07;-0.17;0.04;-0.04;-0.15;0.08
total individualized alpha power;-0.31;-0.38;-0.24;-0.37;-0.43;-0.31;0.01;-0.09;0.1;0.01;-0.09;0.12;0.13;0.01;0.25
Relative individualized alpha power;0.14;0.06;0.22;-0.35;-0.41;-0.28;-0.01;-0.11;0.1;0.01;-0.1;0.12;-0.05;-0.17;0.07
aperiodic-adjusted individualized alpha power;0.23;0.16;0.3;-0.39;-0.45;-0.33;-0.04;-0.14;0.05;-0.02;-0.13;0.08;-0.06;-0.17;0.06
aperiodic intercept;-0.54;-0.61;-0.48;-0.37;-0.42;-0.32;-0.02;-0.1;0.07;-0.02;-0.1;0.08;0.08;-0.02;0.19
aperiodic slope;-0.44;-0.51;-0.38;-0.39;-0.44;-0.33;-0.04;-0.12;0.05;-0.03;-0.12;0.06;-0.05;-0.15;0.06
