# Supplementary material for: Decomposing the role of alpha oscillations during brain maturation
Source: eLife. 2022 Aug 25;11:e77571. doi: 10.7554/eLife.77571 (PMC9410707; doi:10.7554/eLife.77571)
Supplement: Table 2—source data 1. [file elife-77571-table2-data1.csv]

;Total individualized alpha power;Relative individualized alpha power;Aperiodic-adjusted individualized alpha power;Aperiodic intercept;Aperiodic slope
Total individualized alpha power;;0.66;0.64;0.84;0.64
Relative individualized alpha power;;;0.88;0.34;0.35
Aperiodic- adjusted individualized alpha power;;;;0.34;0.36
Aperiodic intercept;;;;;0.89
