# Supplementary material for: Decomposing the role of alpha oscillations during brain maturation
Source: eLife. 2022 Aug 25;11:e77571. doi: 10.7554/eLife.77571 (PMC9410707; doi:10.7554/eLife.77571)
Supplement: Table 3—source data 1. [file elife-77571-table3-data1.csv]

	age (beta)	age (CI lower)	age (CI upper)	gender (beta)	gender (CI lower)	gender (CI upper)	diag ADHD (beta)	diag ADHD (CI lower)	diag ADHD (CI upper)	age*gender (beta)	age*gender (CI lower)	age*gender (CI upper)
alpha peak frequency	0.34	0.15	0.53	-0.05	-0.21	0.11	-0.04	-0.2	0.12	0.04	-0.25	0.33
total individualized alpha power	-0.44	-0.61	-0.27	-0.05	-0.19	0.11	0.04	-0.11	0.19	-0.07	-0.33	0.3
Relative individualized alpha power	0.2	0	0.39	0.05	-0.12	0.22	-0.02	-0.18	0.15	-0.1	-0.4	0.2
aperiodic-adjusted individualized alpha power	0.33	0.14	0.52	-0.02	-0.18	0.13	-0.04	-0.21	0.21	-0.06	-0.35	0.24
aperiodic intercept	-0.76	-0.88	-0.65	-0.1	-0.19	0	0	-0.1	0.09	-0.07	-0.25	0.11
aperiodic slope	-0.6	-0.77	-0.45	-0.08	-0.21	0.05	-0.06	-0.19	0.06	-0.13	-0.36	0.1
