# Supplementary material for: Decomposing the role of alpha oscillations during brain maturation
Source: eLife. 2022 Aug 25;11:e77571. doi: 10.7554/eLife.77571 (PMC9410707; doi:10.7554/eLife.77571)
Supplement: Table 4—source data 1. [file elife-77571-table4-data1.csv]

Outcome	left thalamic radiation (beta)	left thalamic radiation (CI lower)	left thalamic radiation (CI upper)	right thalamic radiation (beta)	right thalamic radiation (CI lower)	right thalamic radiation (CI upper)	thalamus volume (beta)	thalamus volume (CI lower)	thalamus volume (CI upper)	total intracranial volume (beta)	total intracranial volume (CI lower)	total intracranial volume (CI upper)	age (beta)	age (CI lower)	age (CI upper)	gender (beta)	gender (CI lower)	gender (CI upper)
total individualized alpha power	0.06 [-0.02 0.14]	-0.02	0.14	0.07	-0.01	0.15	0.03	-0.23	0.29	-0.01	-0.14	0.13	-0.23	-0.31	-0.15	-0.35	-0.43	-0.27
aperiodic-adjusted individualized alpha power	0.15	0.07	0.23	0.15	0.07	0.23	0.07	-0.19	0.33	-0.04	-0.18	0.1	0.22	0.14	0.3	-0.39	-0.47	-0.31
relative alpha power	0.11	0.04	0.2	0.14	0.06	0.22	0	-0.27	0.27	-0.01	-0.15	0.13	0.14	0.07	0.22	-0.35	-0.43	-0.27
aperiodic intercept	0.04	-0.04	0.1	0.02	-0.05	0.09	-0.01	-0.24	0.23	0.03	-0.09	0.15	-0.51	-0.58	-0.44	-0.35	-0.42	-0.28
aperiodic slope	0.07	0	0.14	0.03	-0.03	0.11	-0.11	-0.34	0.13	-0.03	-0.13	0.17	-0.48	-0.55	-0.41	-0.39	-0.45	-0.31
