# Supplementary material for: Decomposing the role of alpha oscillations during brain maturation
Source: eLife. 2022 Aug 25;11:e77571. doi: 10.7554/eLife.77571 (PMC9410707; doi:10.7554/eLife.77571)
Supplement: Table 5—source data 1. [file elife-77571-table5-data1.csv]

Outcome	Flanker total score (b)	Flanker total score (se)	Flanker total score (p)	age (b)	age (se)	age(p)	gender (b)	gender(se)	gender (p)
aperiodic-adjusted individualized alpha power	0.073	0.022	0.001	0.23	0.022	<0.001	-0.75	0.045	<0.001
total individualized alpha power	0.044	0.022	0.046	-0.23	0.022	<0.001	-0.74	0.045	<0.001
relative individualized alpha power	0.068	0.023	0.002	0.14	0.023	<0.001	-0.68	0.047	<0.001
