# Supplementary material for: Decomposing the role of alpha oscillations during brain maturation
Source: eLife. 2022 Aug 25;11:e77571. doi: 10.7554/eLife.77571 (PMC9410707; doi:10.7554/eLife.77571)
Supplement: Table 6—source data 1. [file elife-77571-table6-data1.csv]

;HBN subsample without any given diagnosis;Full HBN sample;Healthy validation subsample;Full validation sample
n total;190;1770;108;310
n female;86;632;62;103
n male;104;1138;46;207
age mean;10.07;10.81;12.97;13.51
age sd;3.39;3.44;3.75;4.16
IQ mean;106.16;98.86;107.95;103.37
IQ sd;15.24;16.55;13.13;14.77
